# Supplementary material for: Synthesis of geological data and comparative phylogeography of lowland tetrapods suggests recent dispersal through lowland portals crossing the Eastern Andean Cordillera
Source: PeerJ journal article supplement (doi:10.7717/peerj.13186), 2022-07-13

**Appendix S2.** Calibrated trees made with BEAST. Decimal values in the nodes represent the posterior values of support. Samples from the eastern and western sides of the EC-MA are represented with “E” and “W”, respectively. The red point indicates the age of divergence between eastern and western populations and represent the nodes used for hABC analyses.

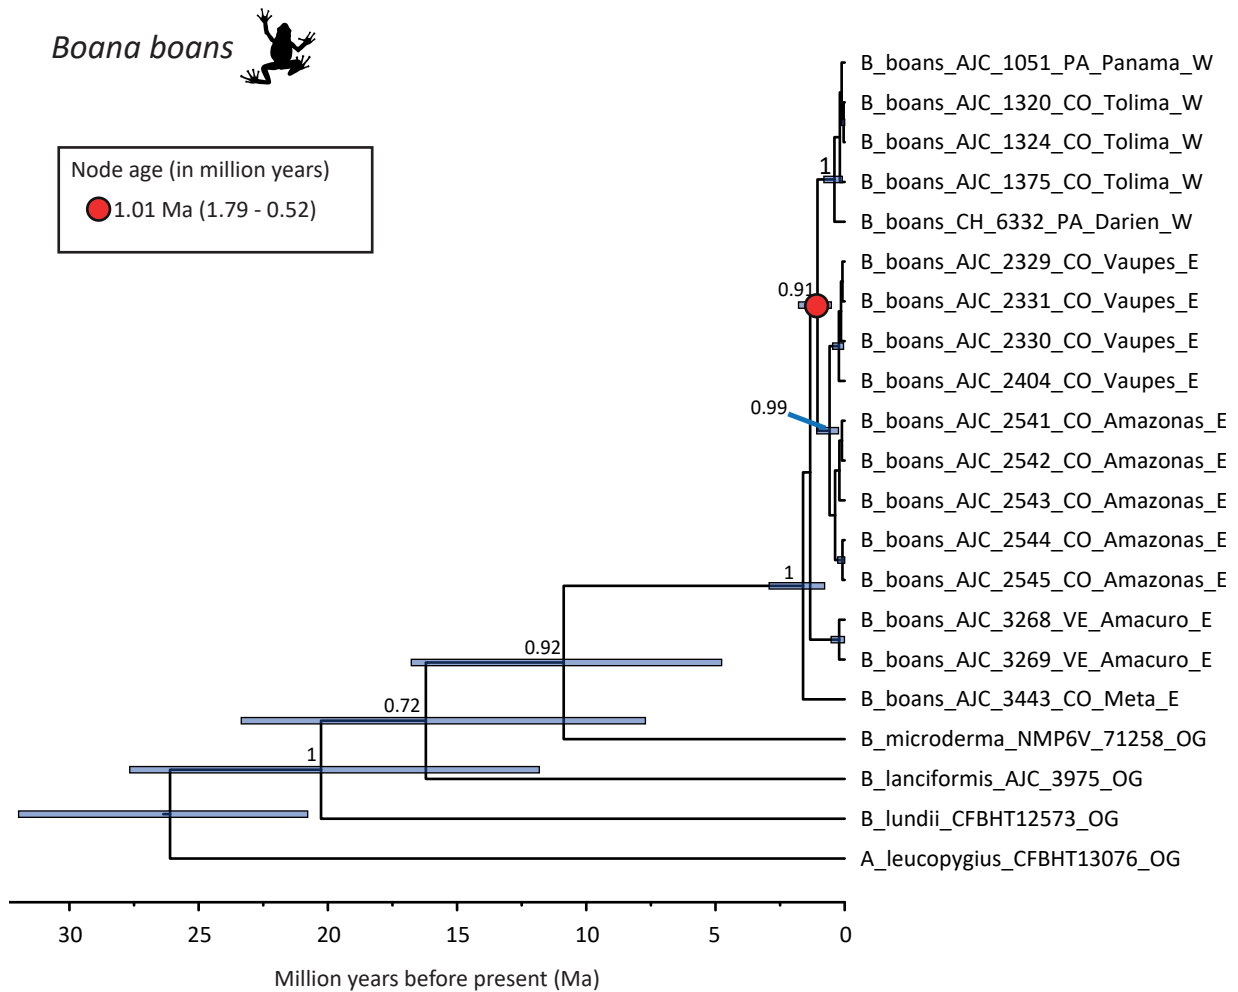

*Boana pugnax*

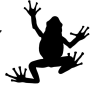

Node age (in million years)  
● 3.14 Ma (6.57 - 0.87)

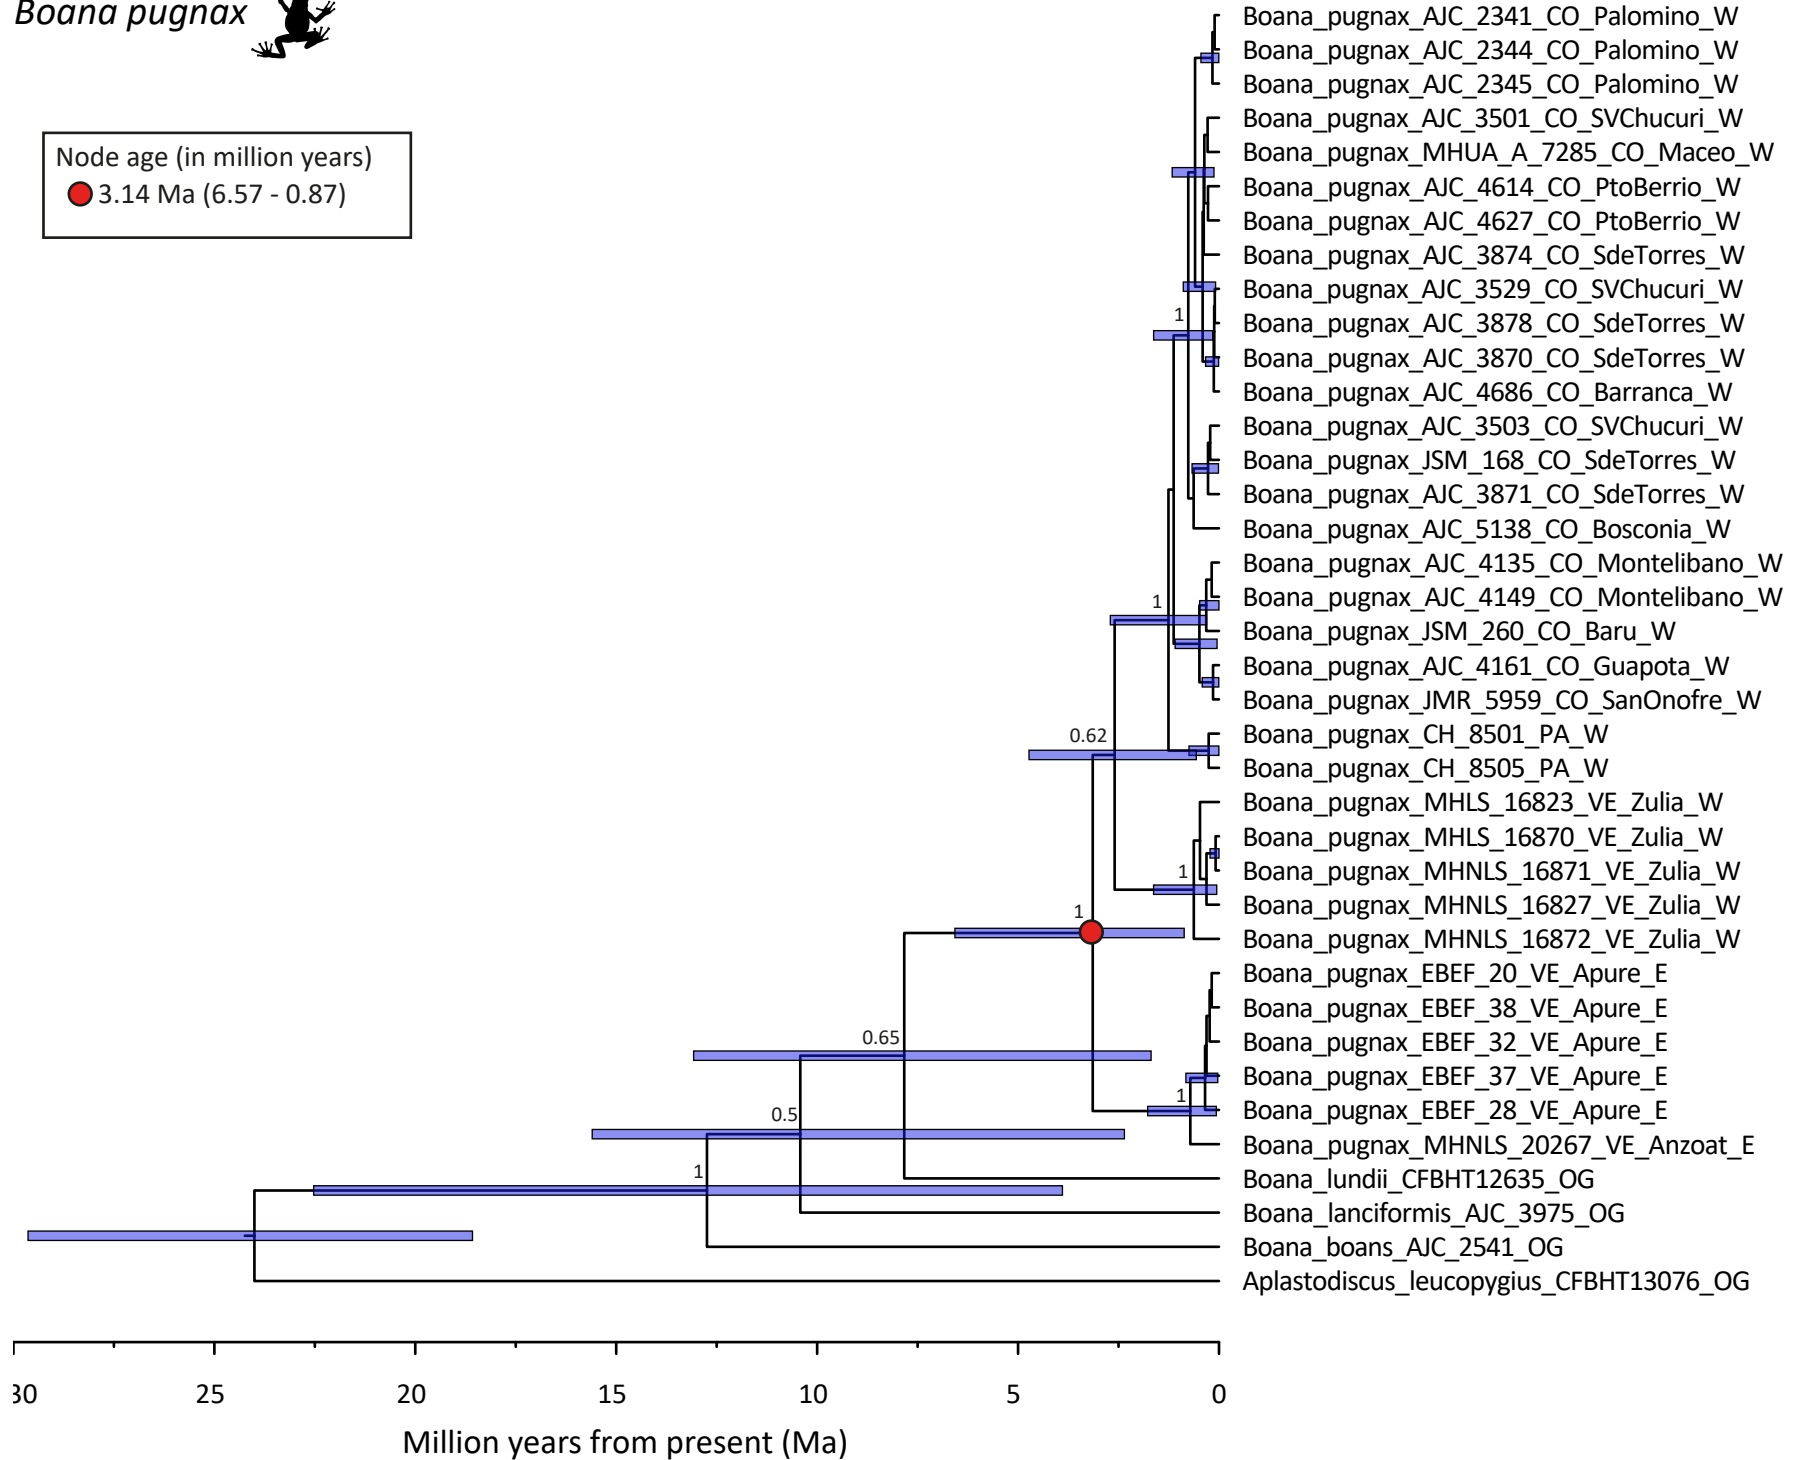

*Boana xerophylla*

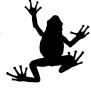

Node age (in million years)  
 ● 2.41 Ma (5.32 - 0.32)

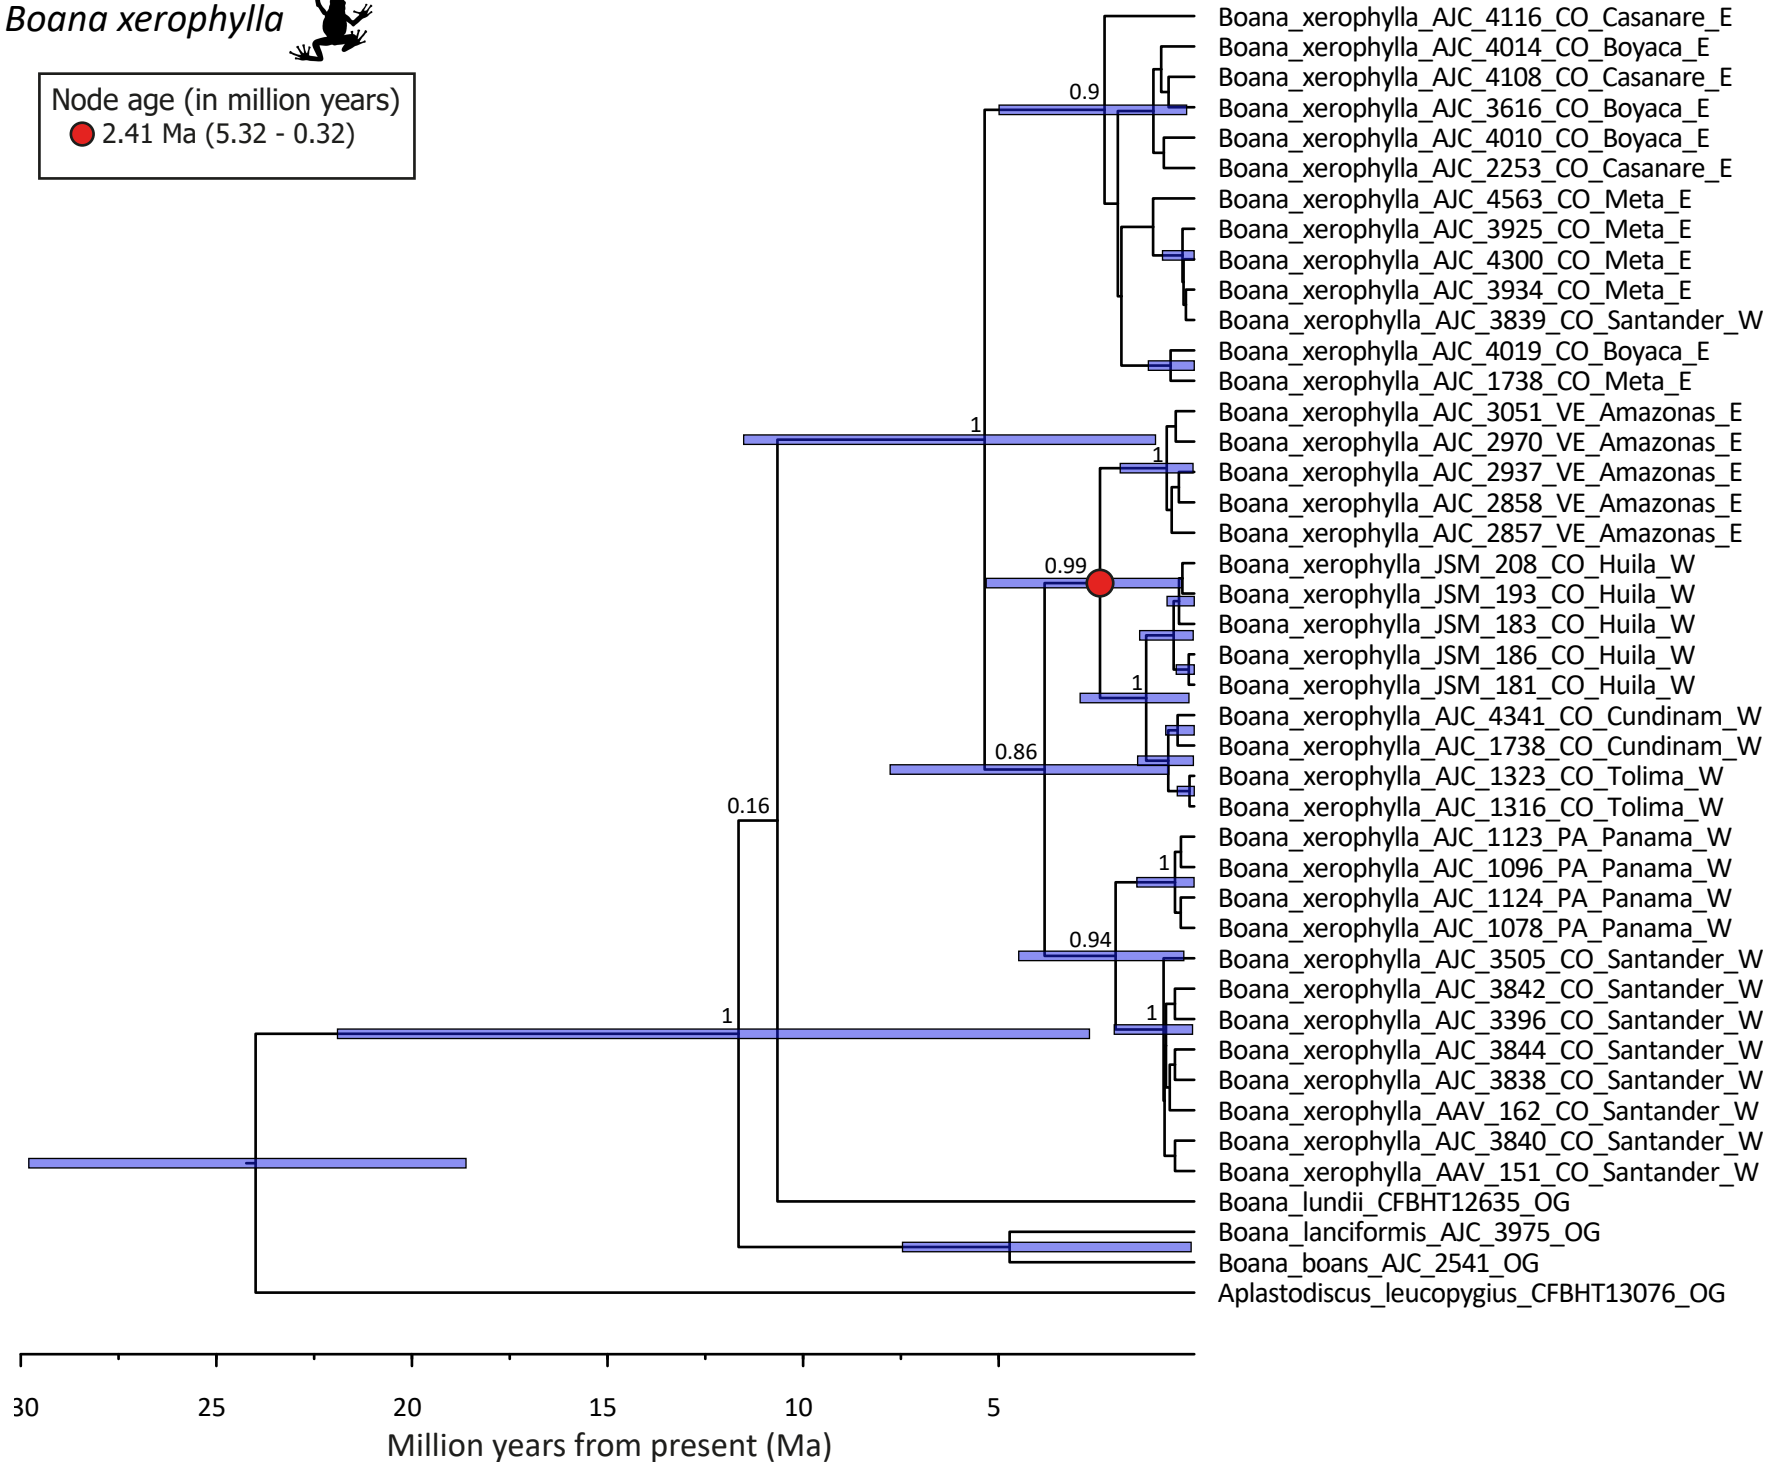

*Dendropsophus microcephalus*

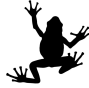

Node age (in million years)  
● 7.03 Ma (14.66 - 1.55)

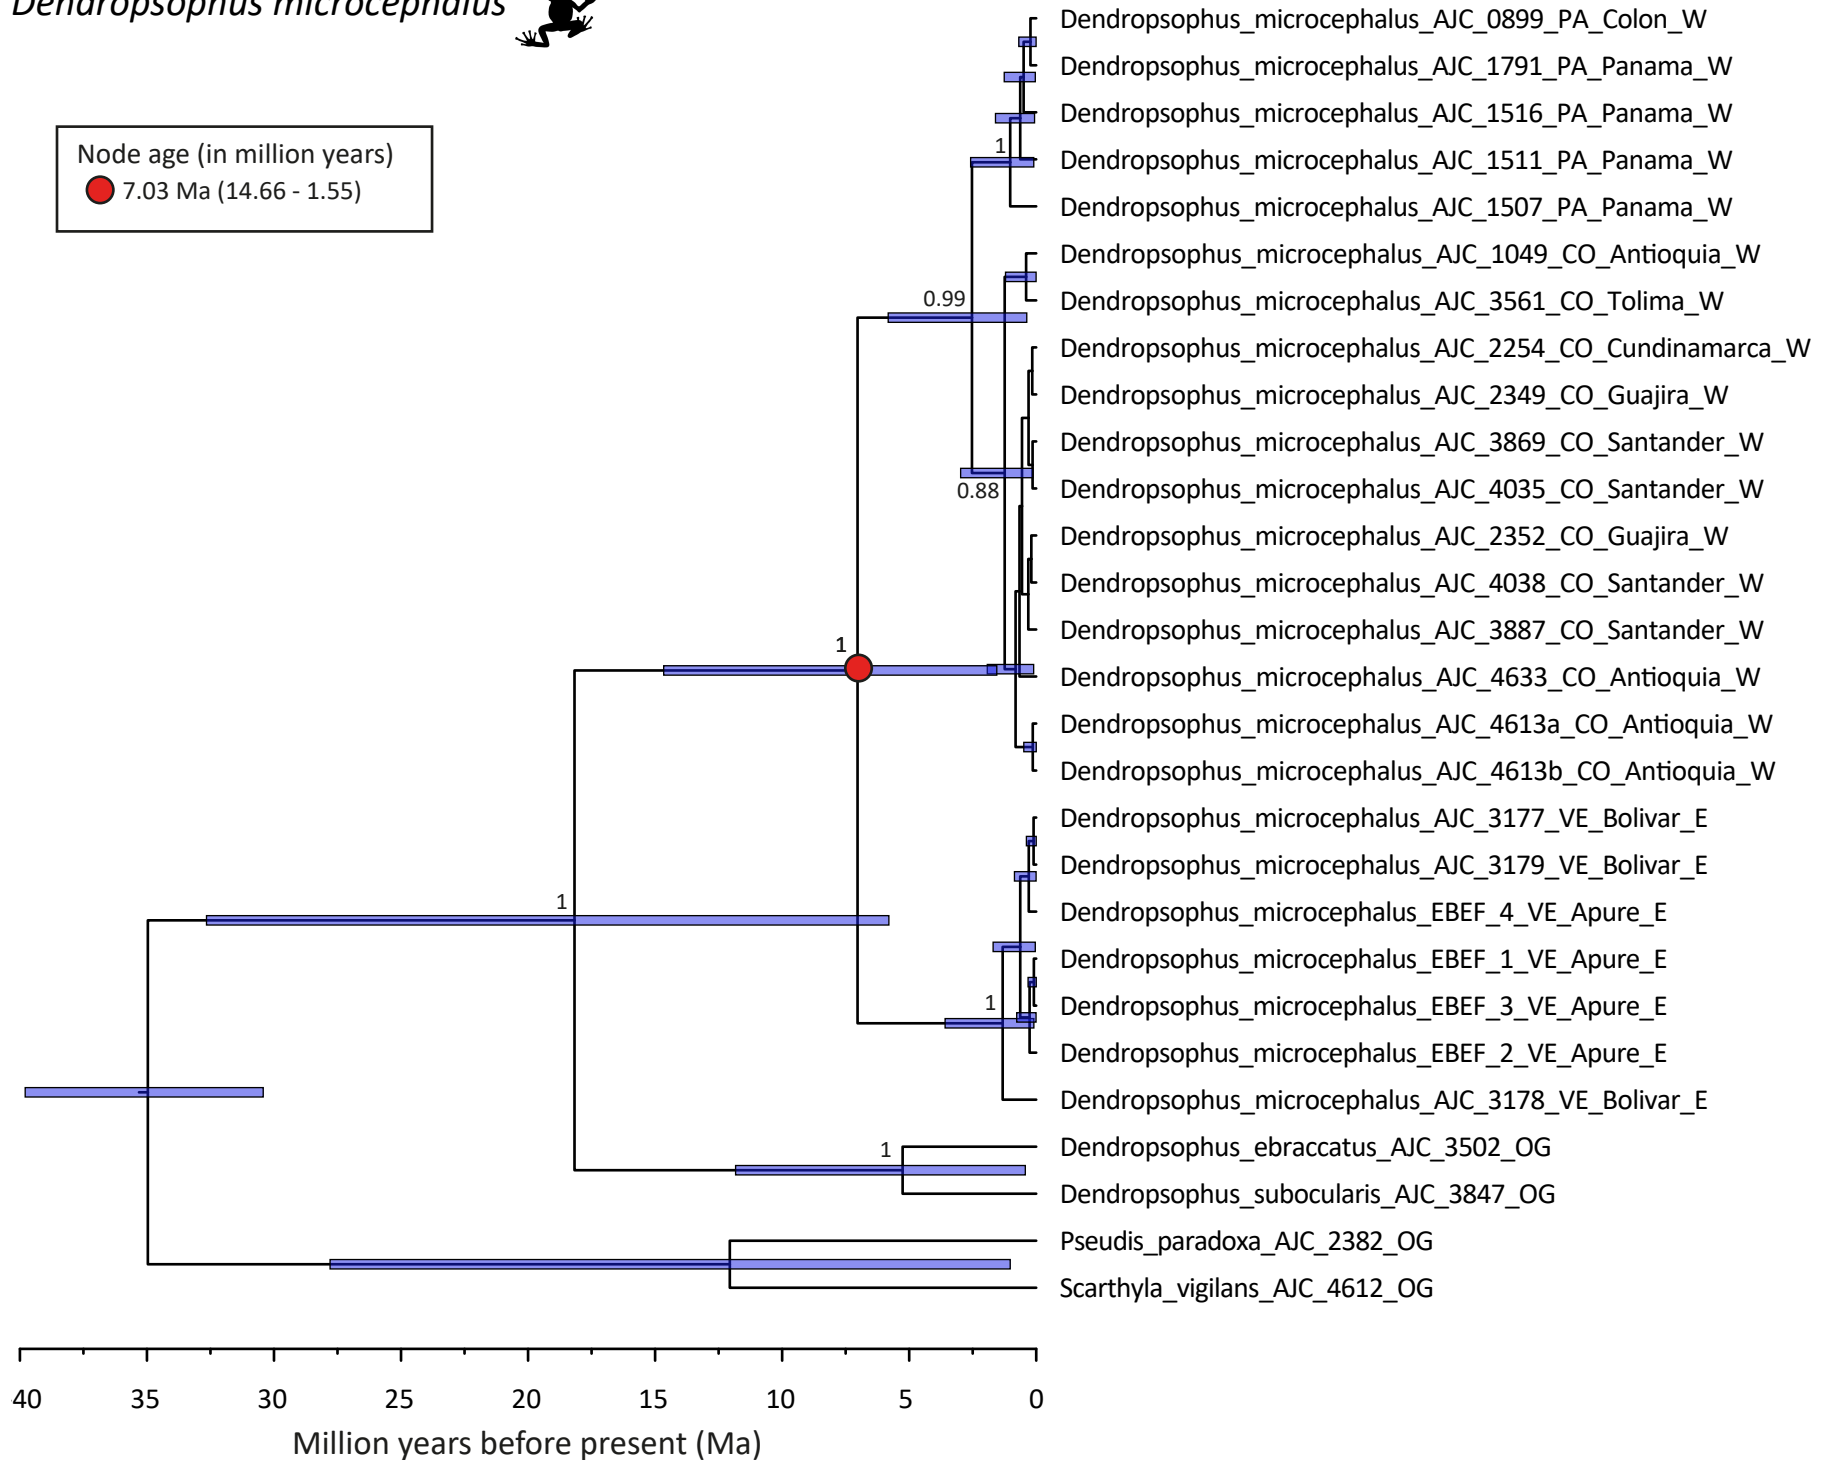

*Elachistocelis ovalis*, *E. pearsei*, *E. surinamensis*

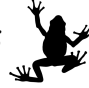

Node age (in million years)  
 ● 3.24 Ma (4.91 - 1.77)

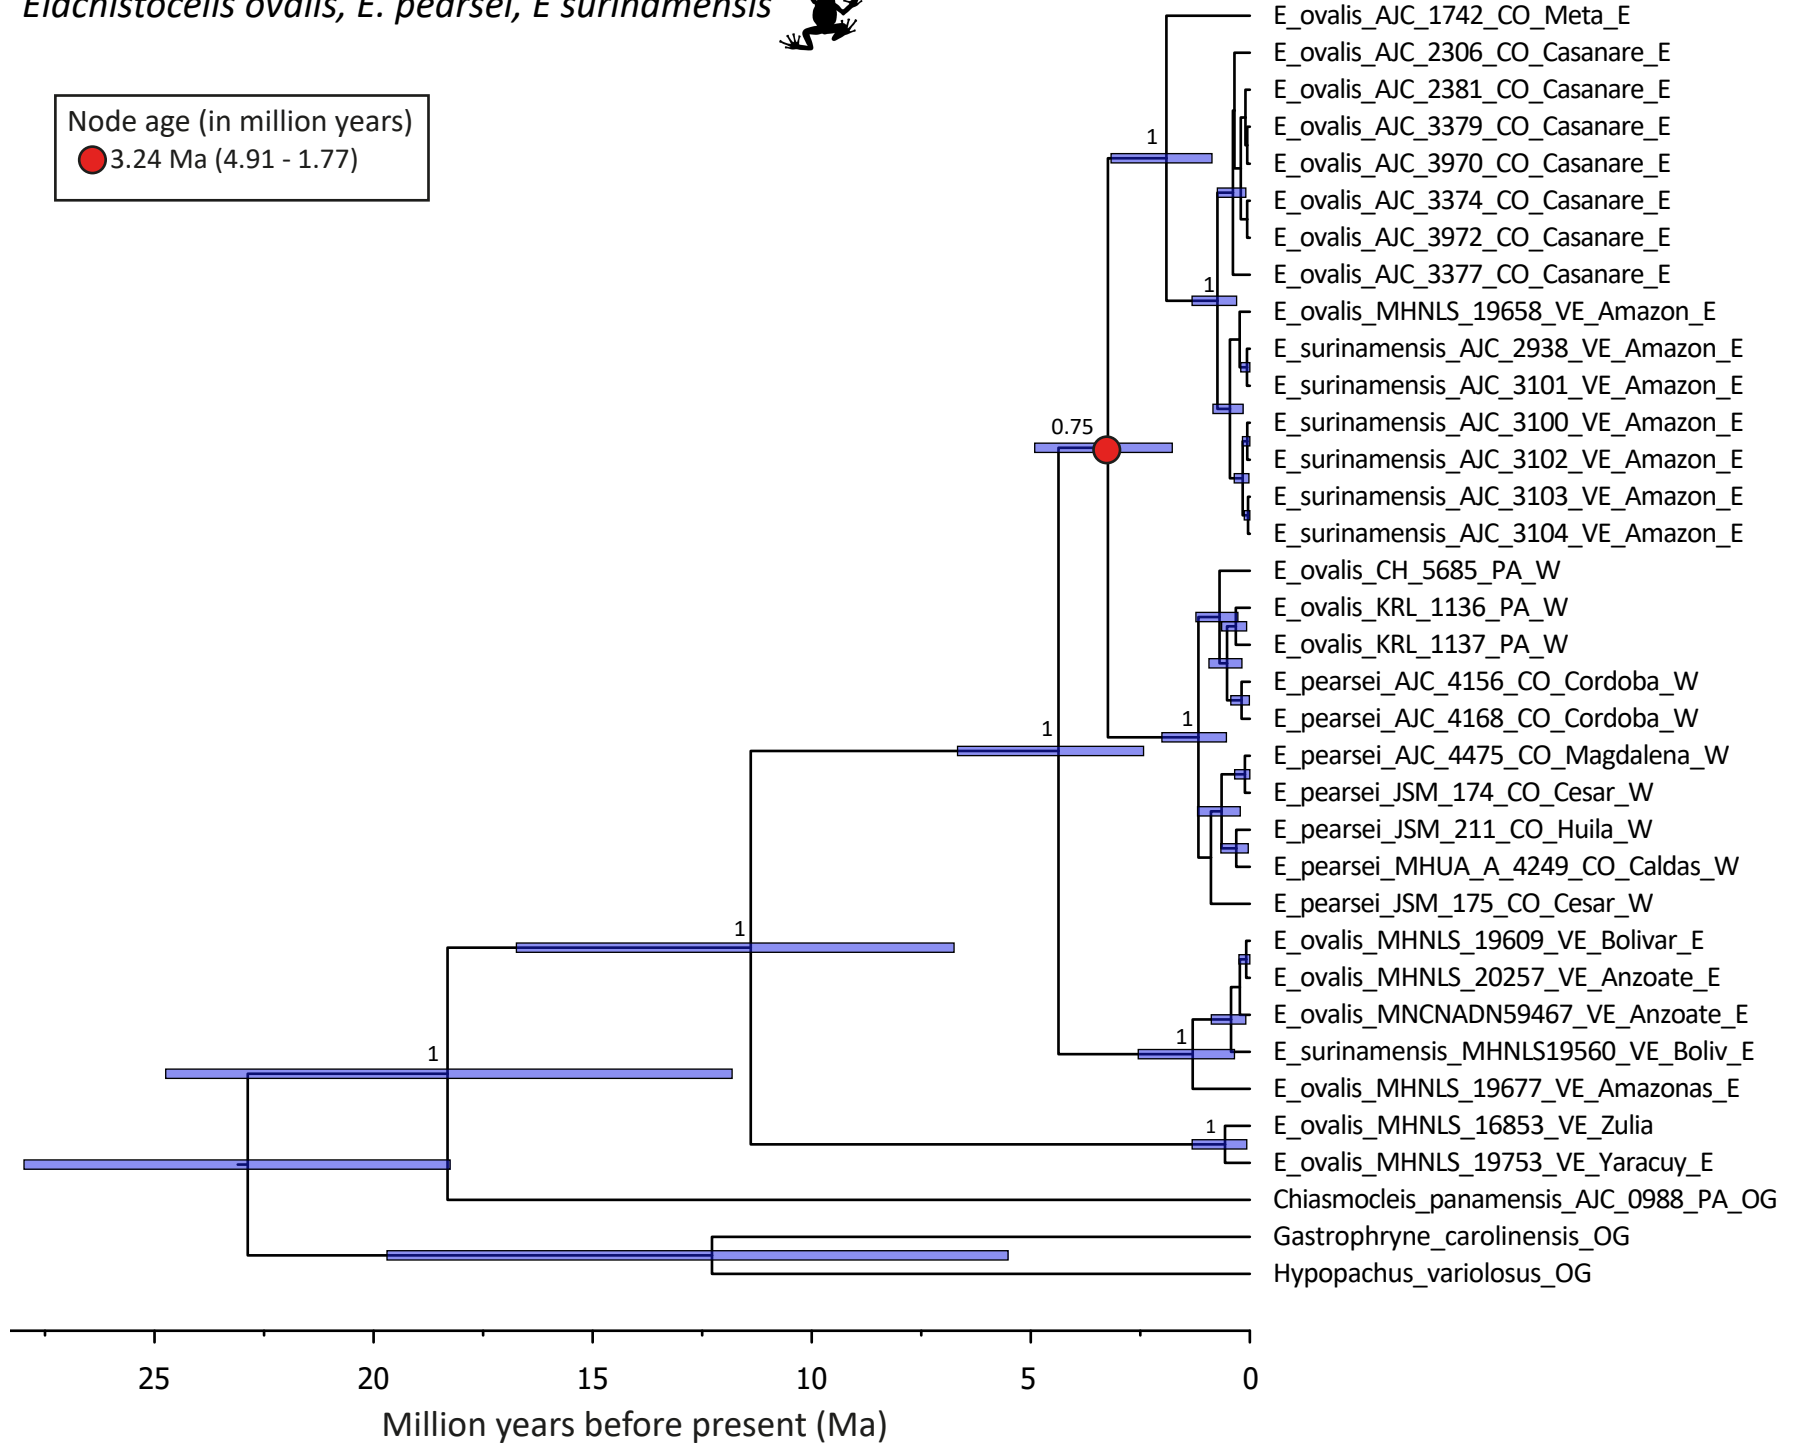

*Leptodactylus bolivianus*

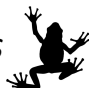

Node age (in million years)  
● 4.83 Ma (7.96 - 1.57)

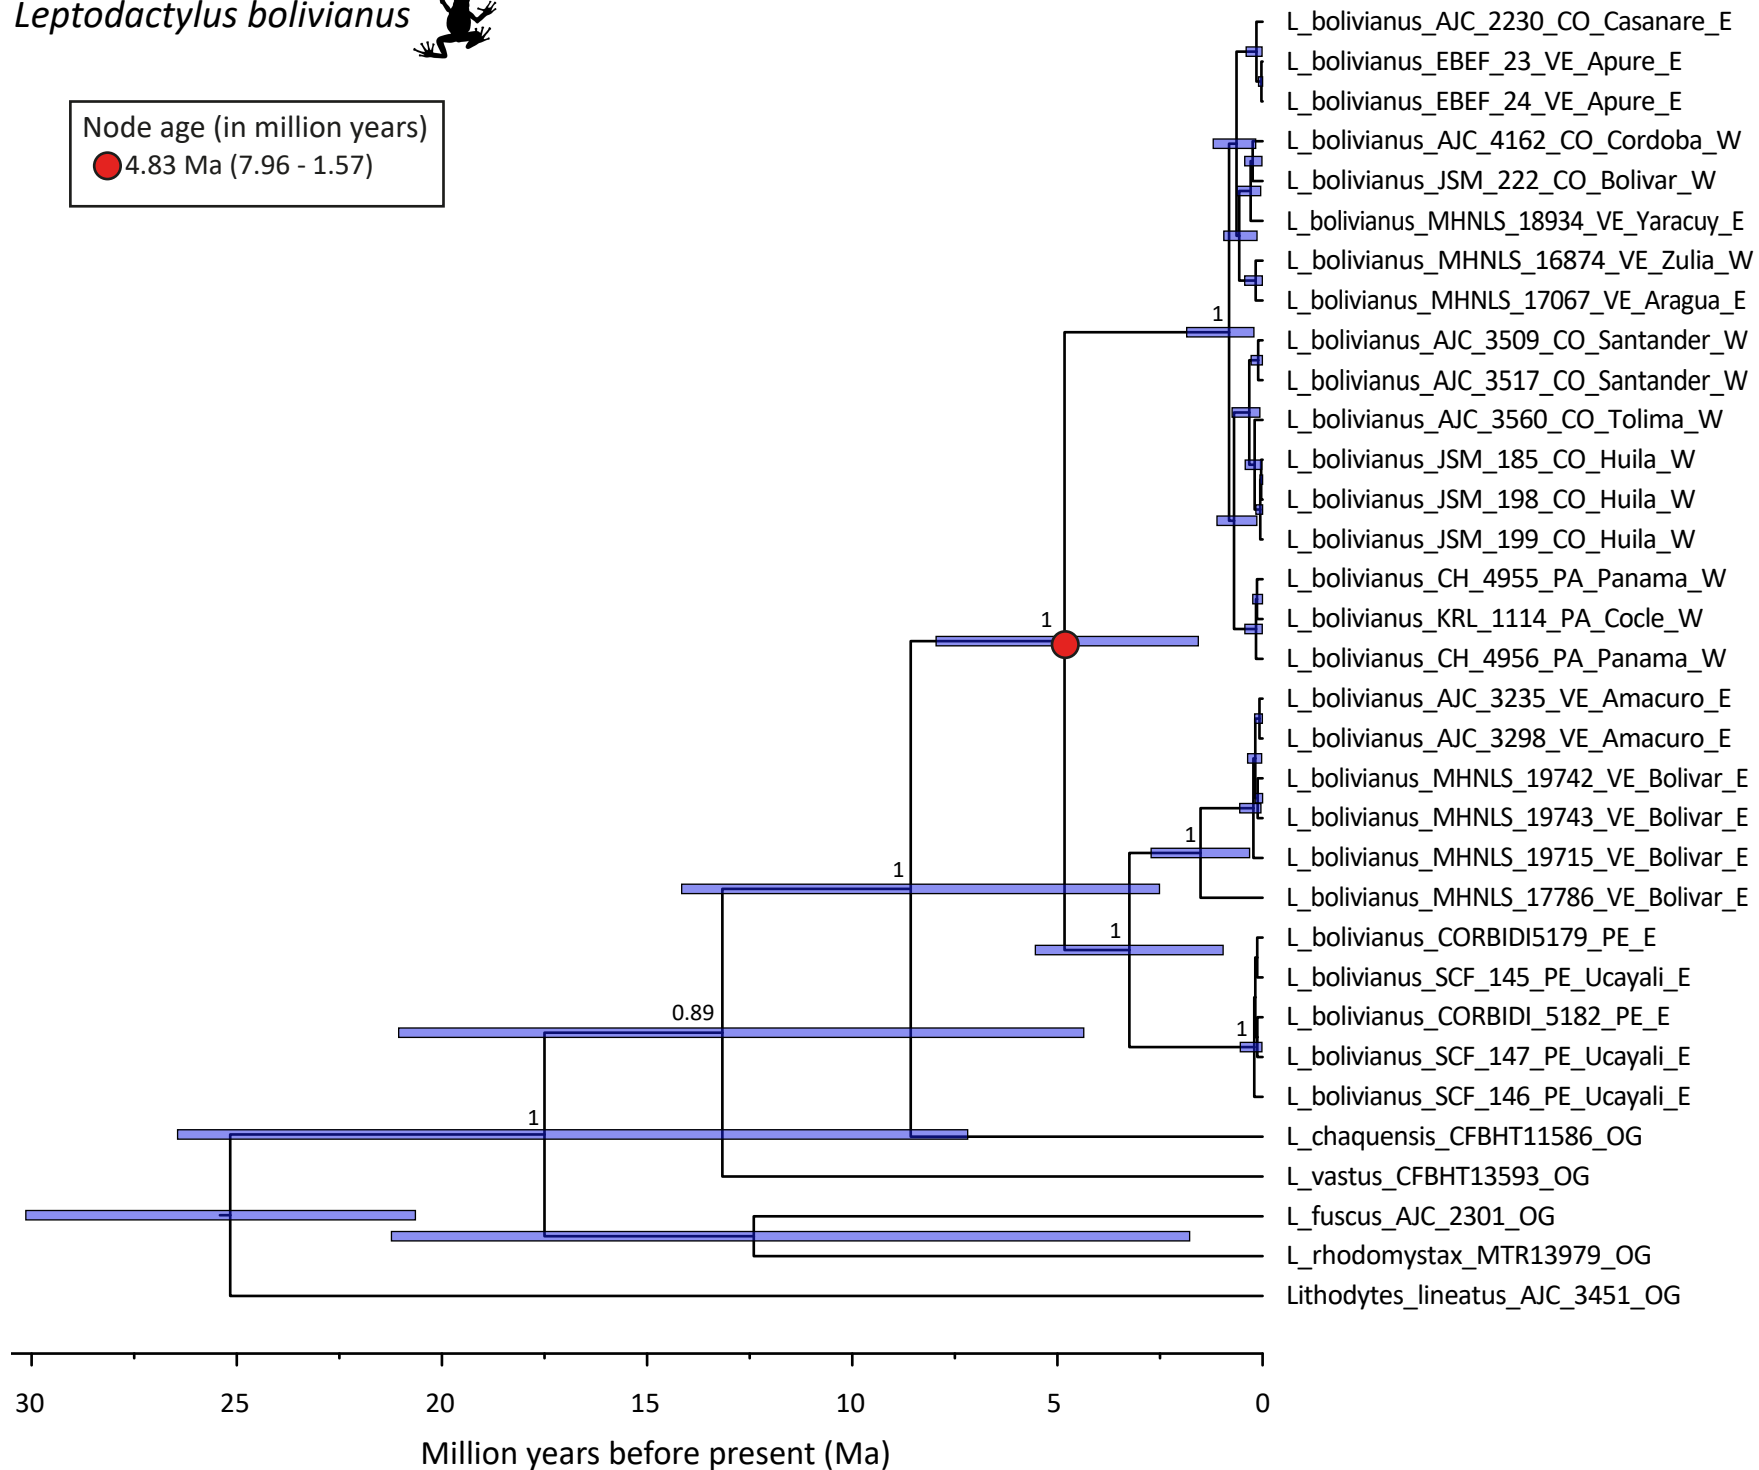

*Leptodactylus fuscus*

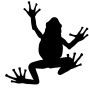

Node age (in million years)

● 3.46 Ma (7.58 - 0.75)

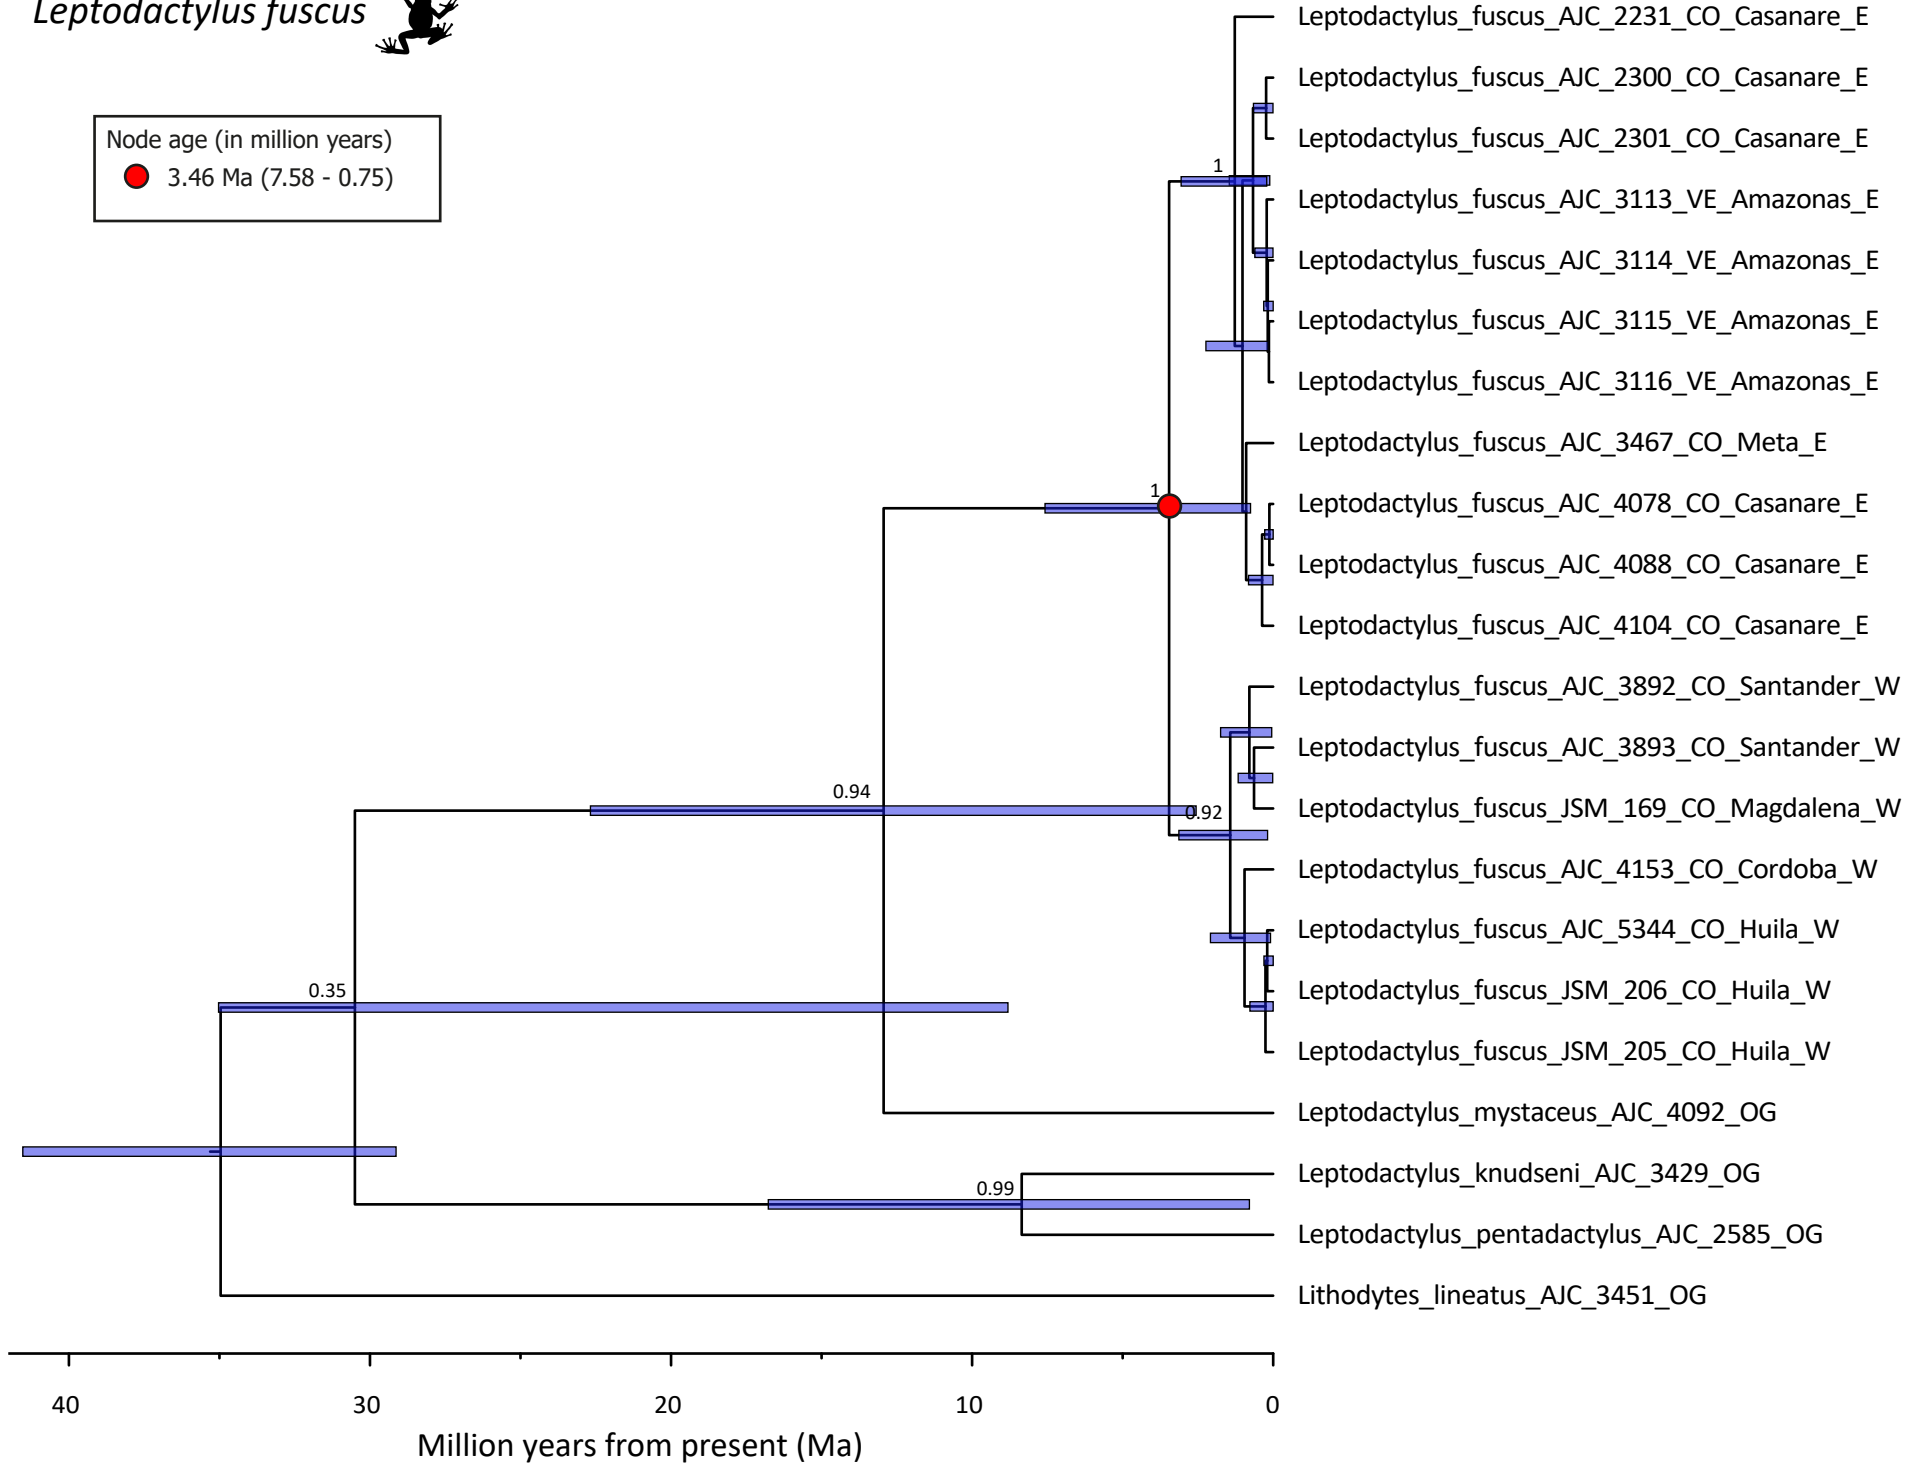

*Scarthyla vigilans*

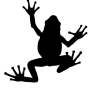

Node age (in million years)  
● 2.29 Ma (4.66 - 0.18)

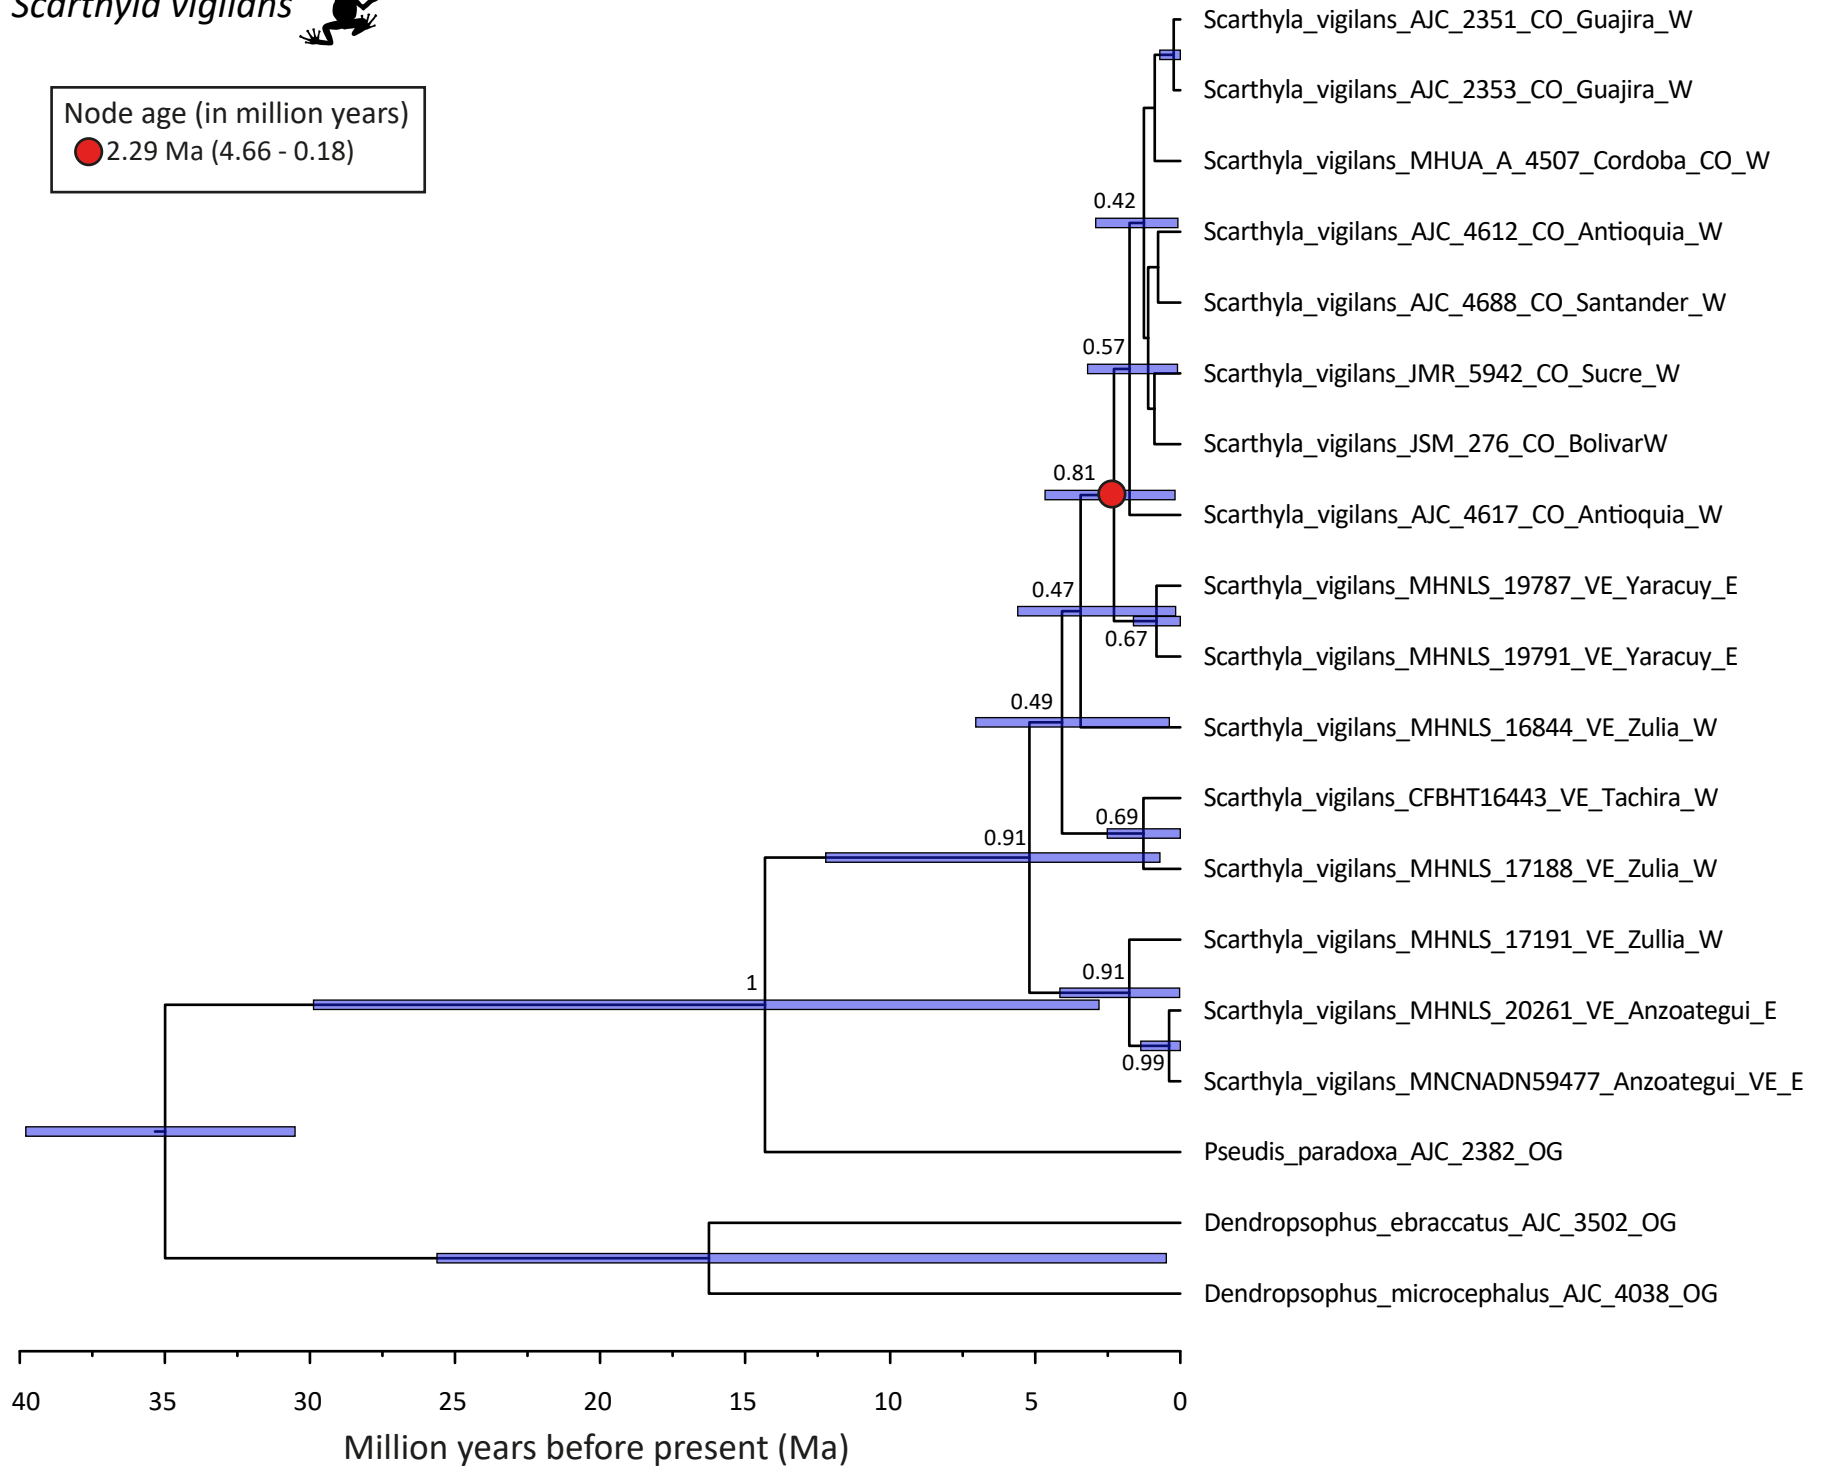



*Scinax ruber* 

Node age (in million years)  
 10.3 Ma (20.44 - 2.2)

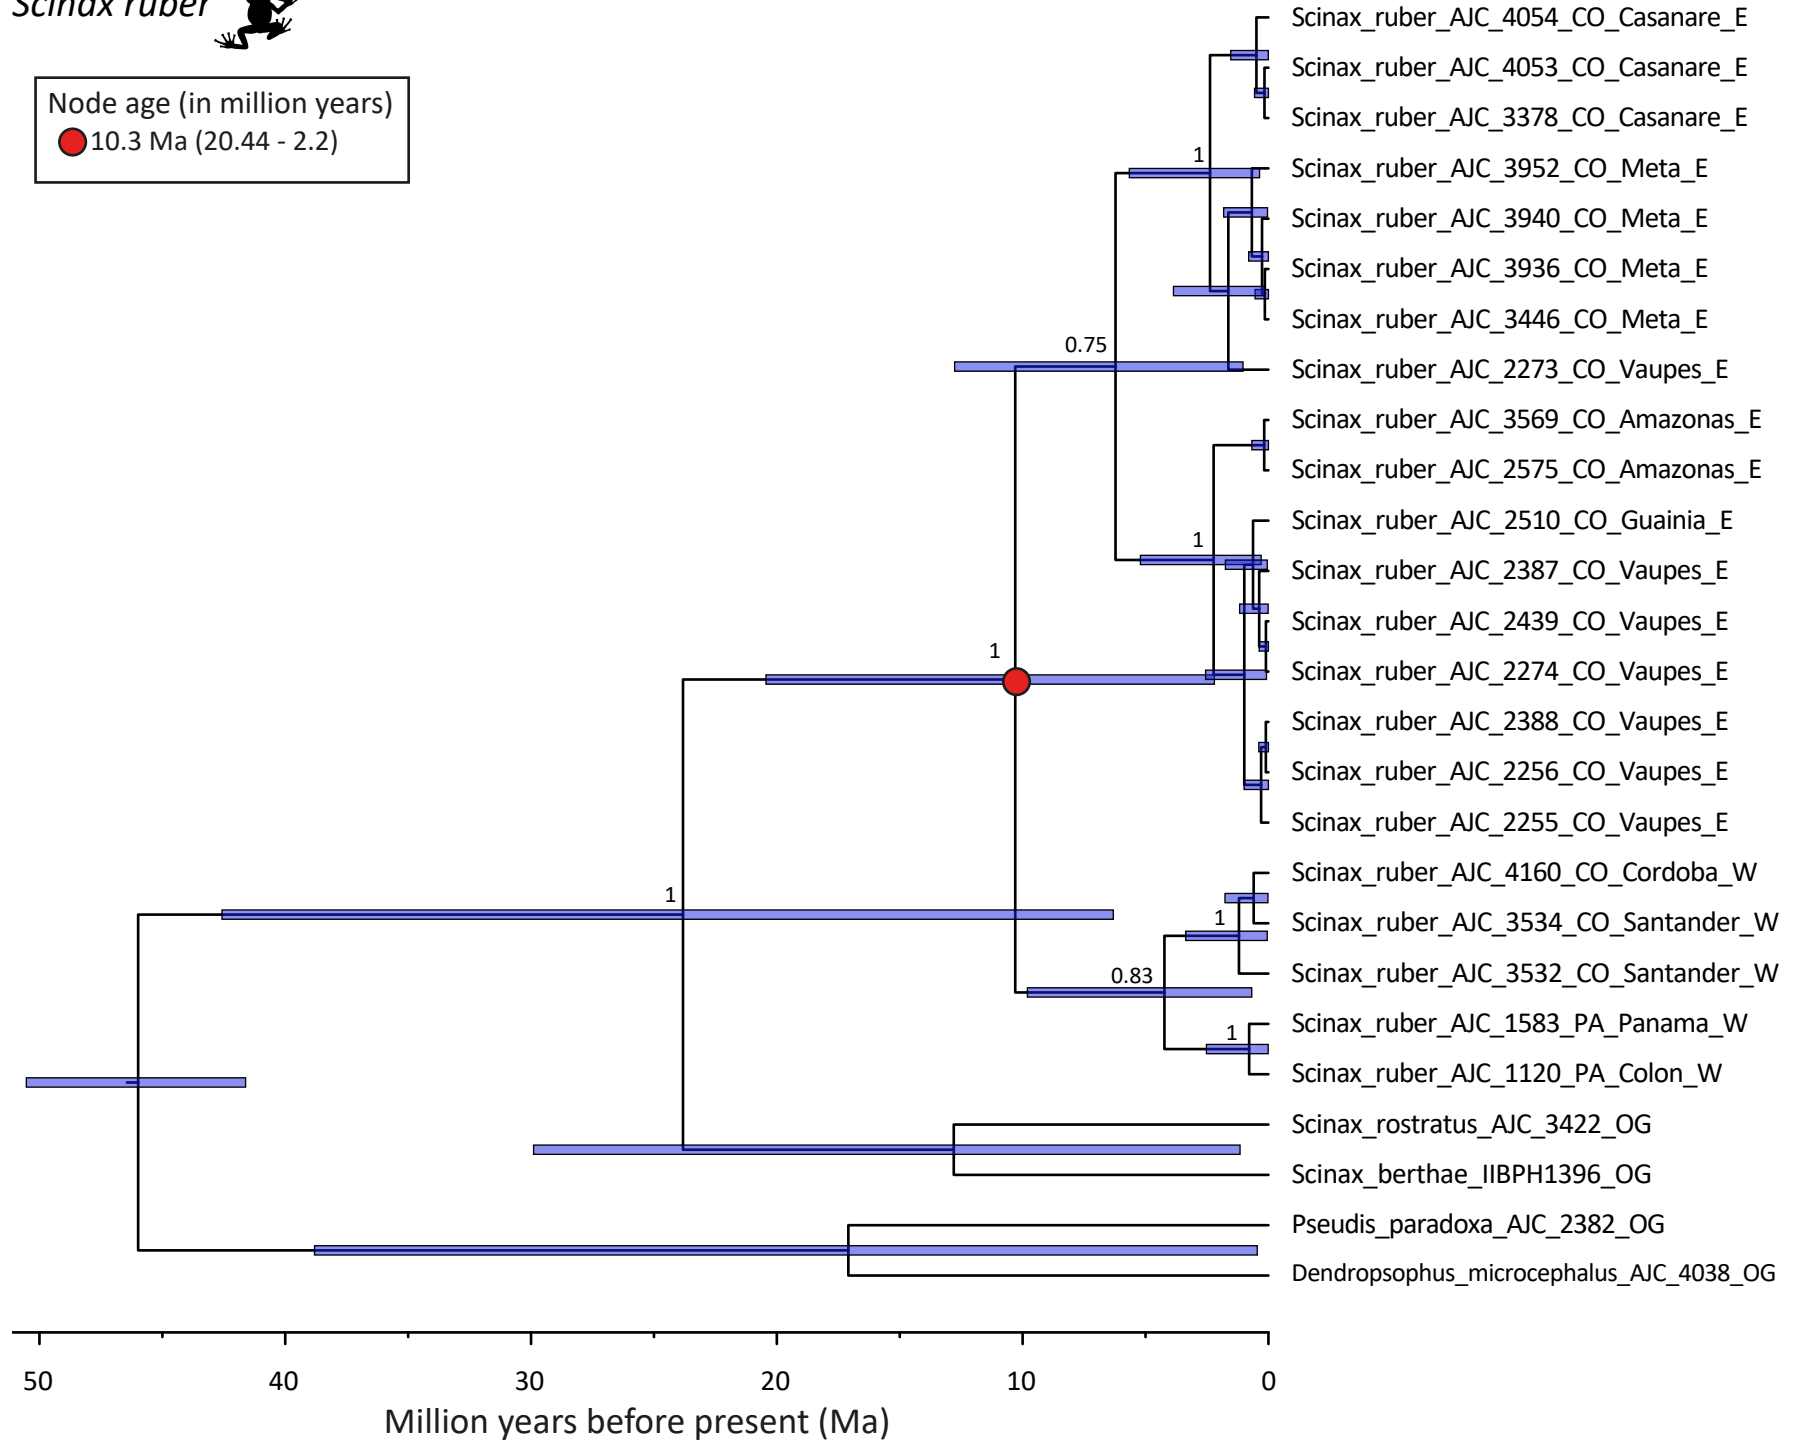

*Boa constrictor* 

Node age (in million years)

● 8.24 Ma (12.77 - 2)

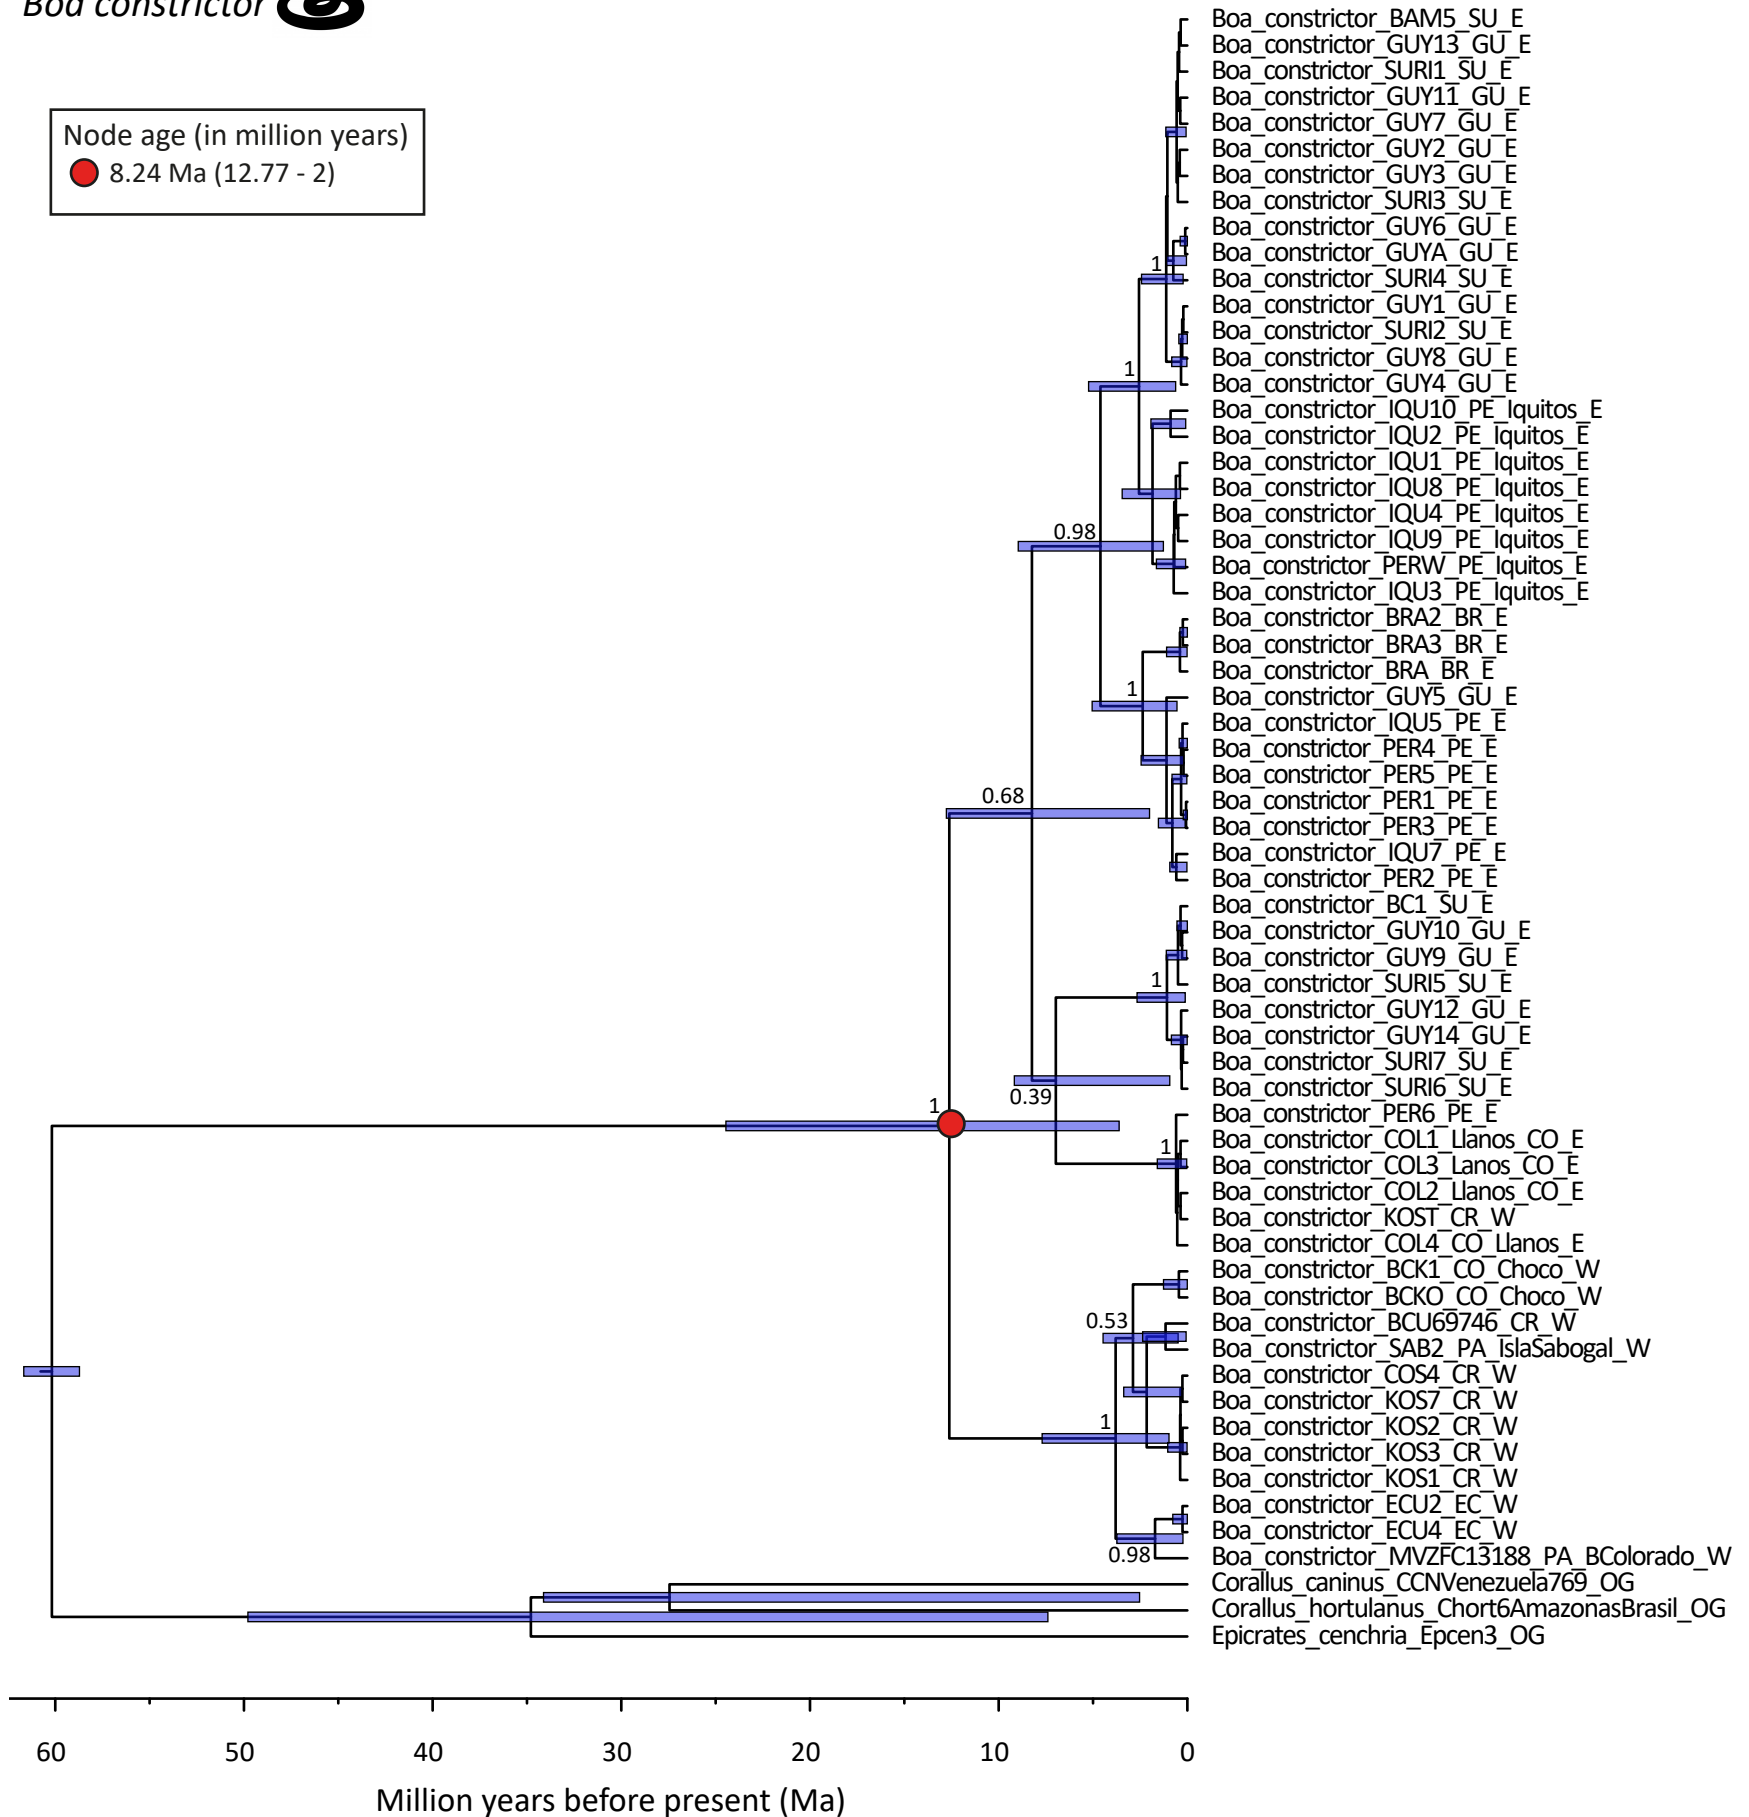

*Caiman crocodilus*

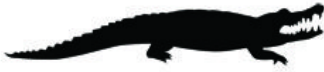

Node age (in million years)

● 6.09 Ma (10.76 - 2.85)

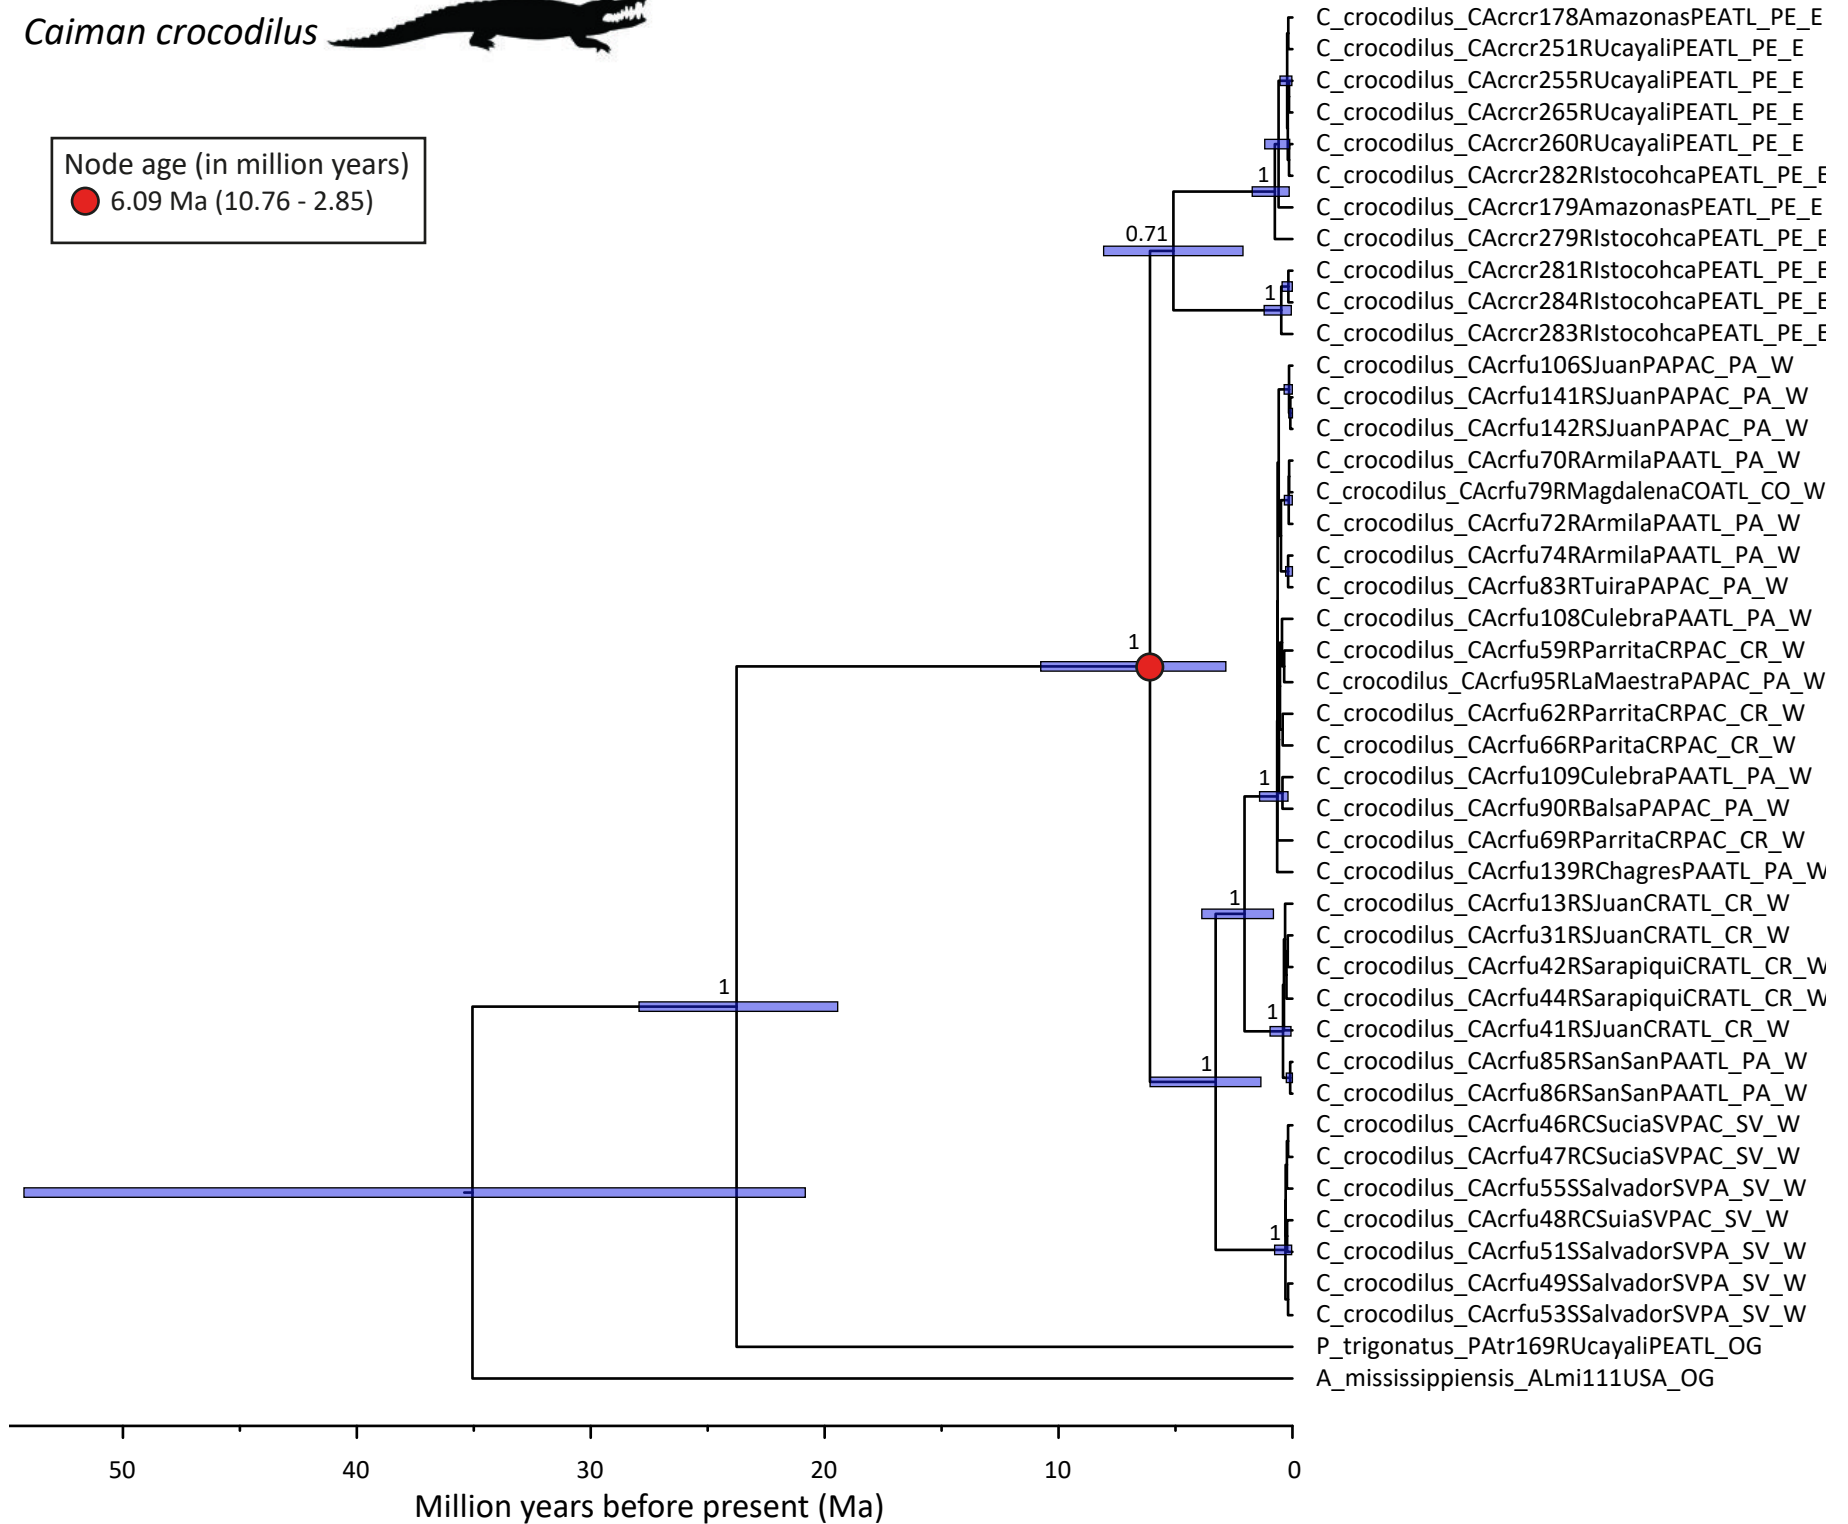



*Crotalus durissus* 

Node age (in million years)  
 0.84 Ma (1.47 - 0.56)

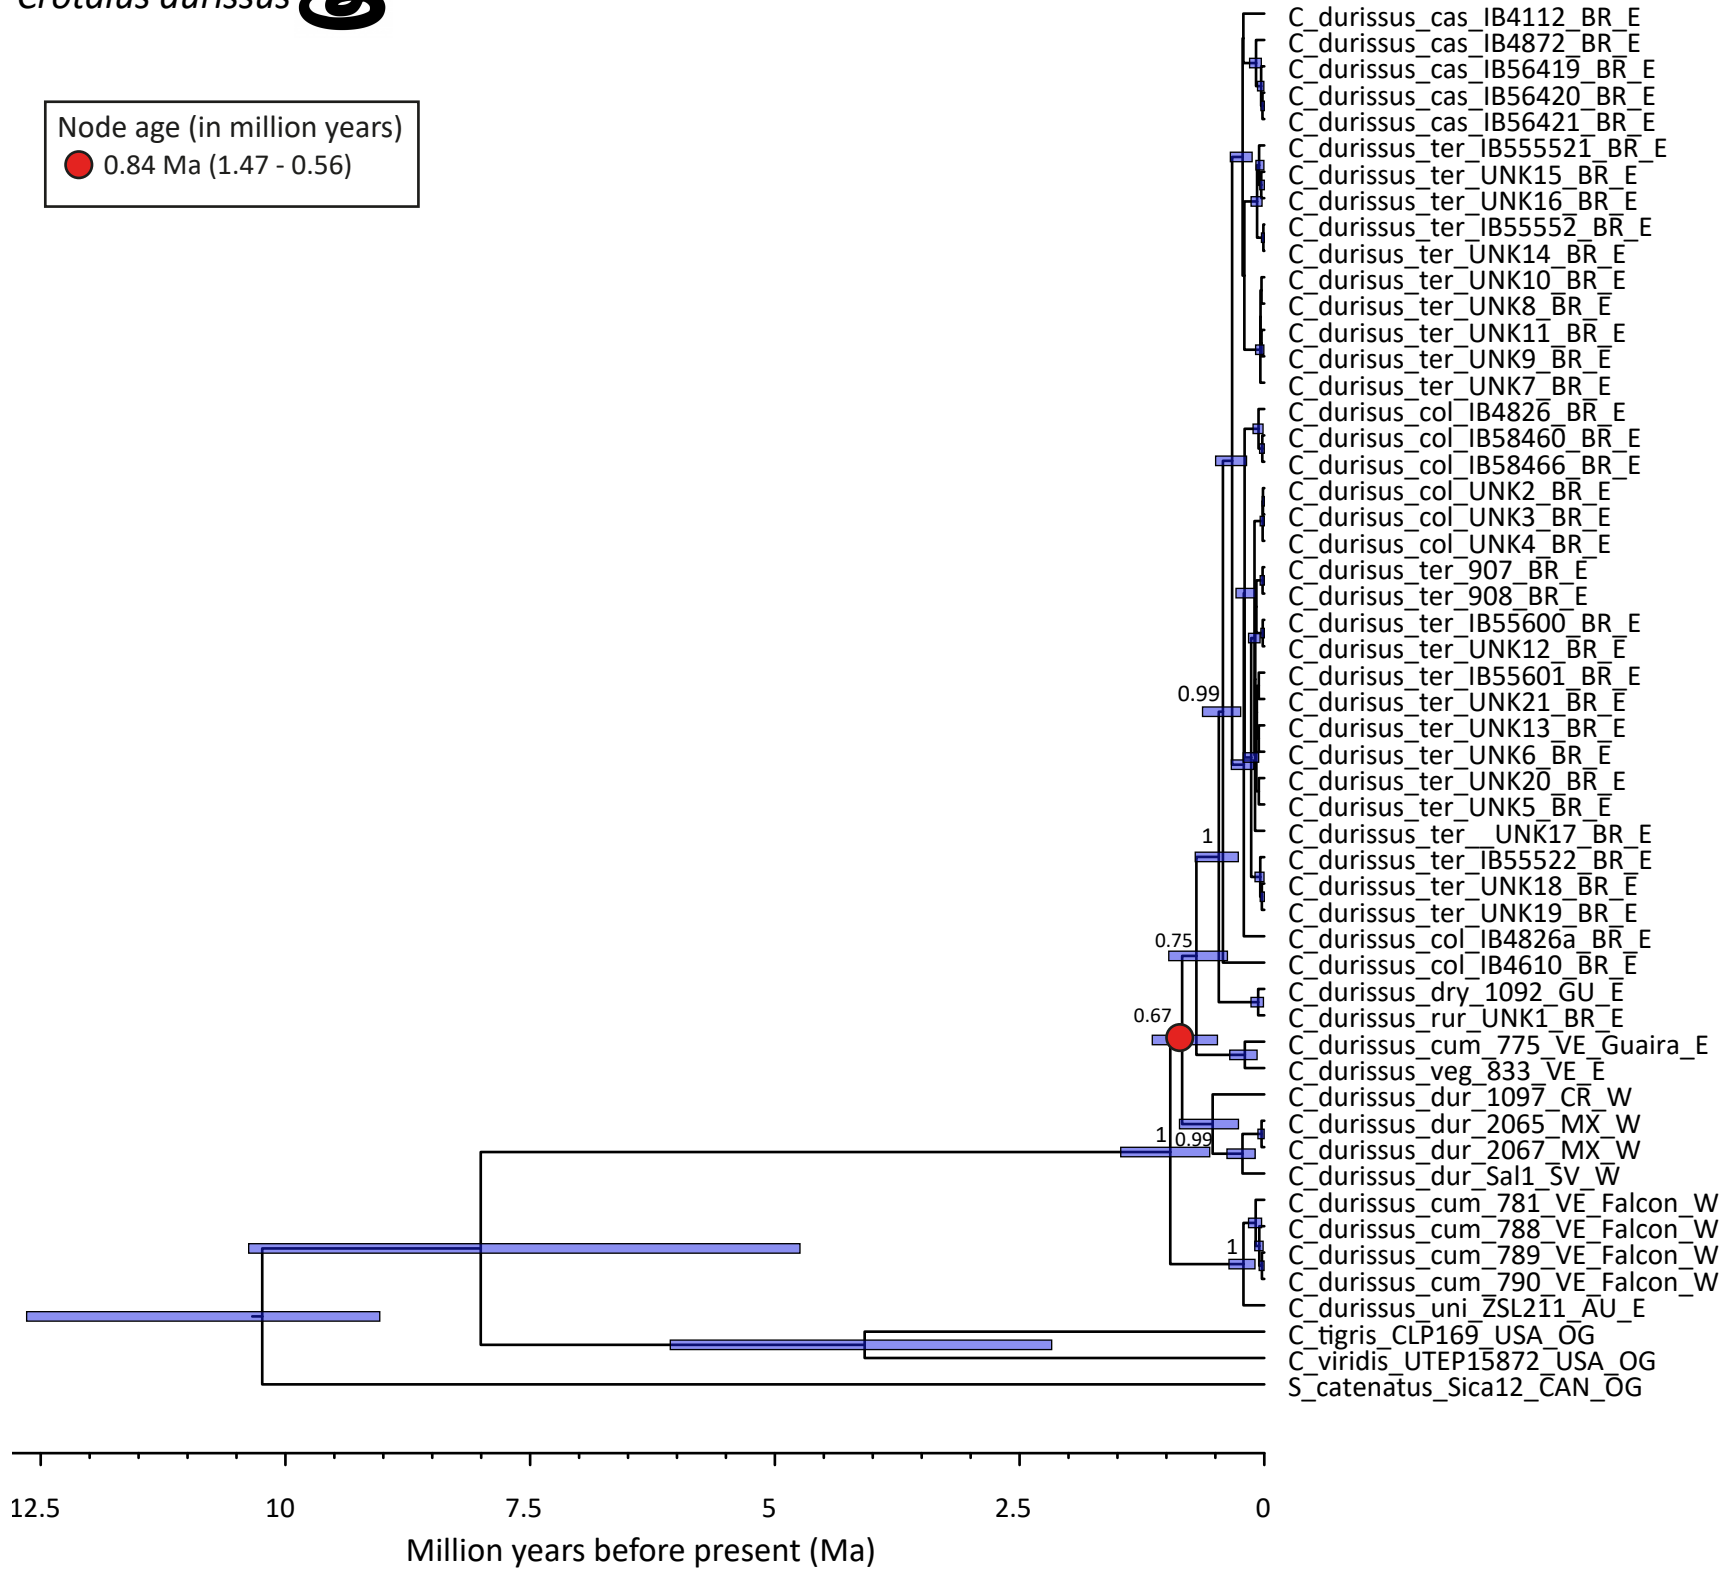

*Leptodeira annulata*, *Leptodeira septentrionalis* 

Node age (in million years)  
 2.29 Ma (3.24 - 1.25)

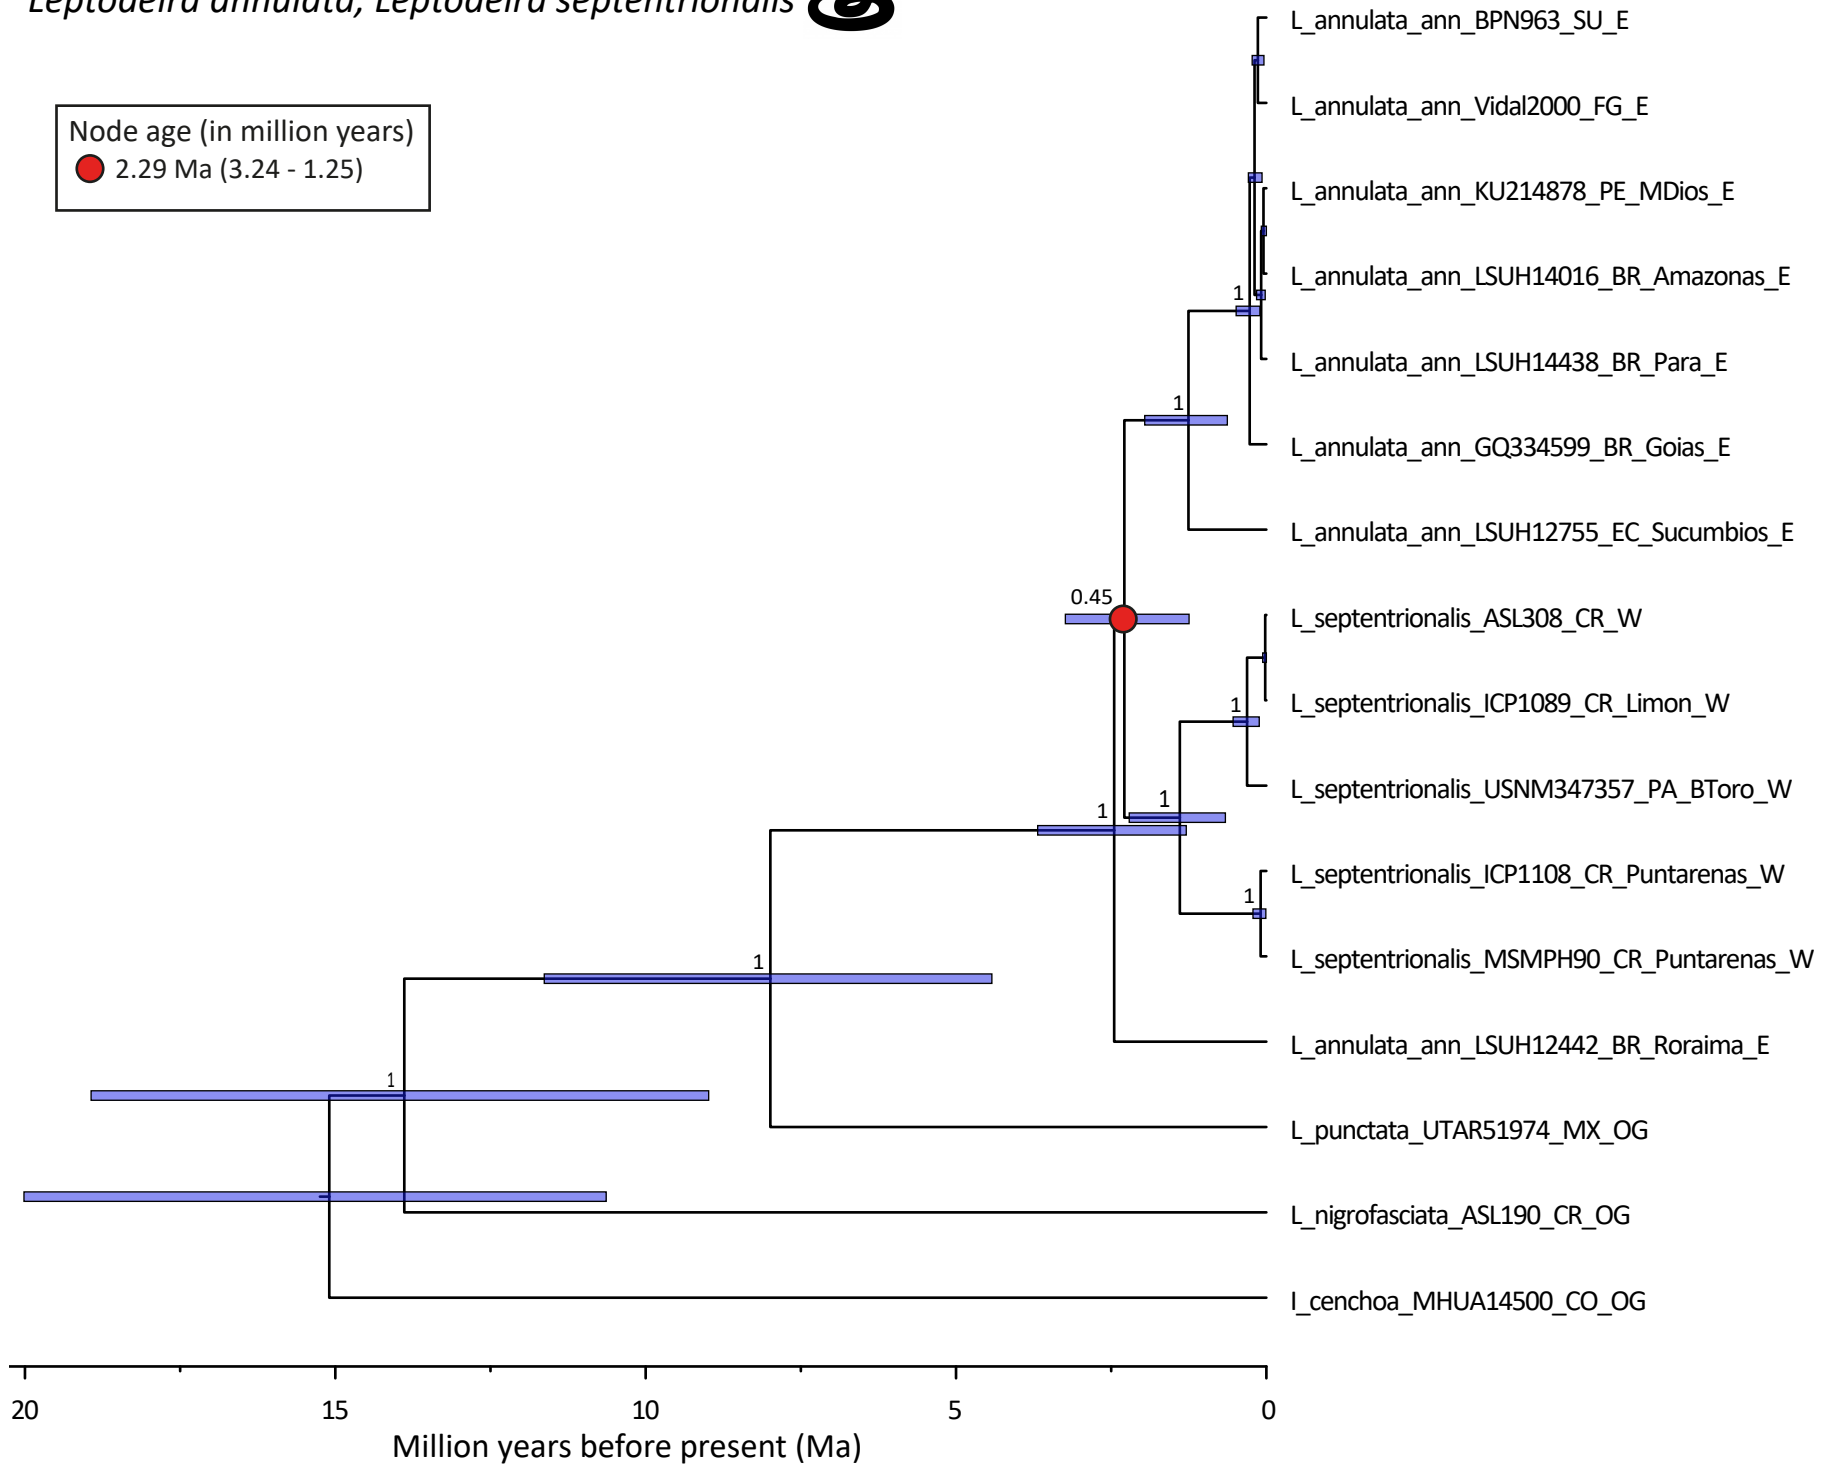

*Automolus ochrolaemus*

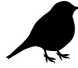

Node age (in million years)

● 2.03 Ma (2.57 - 1.26)

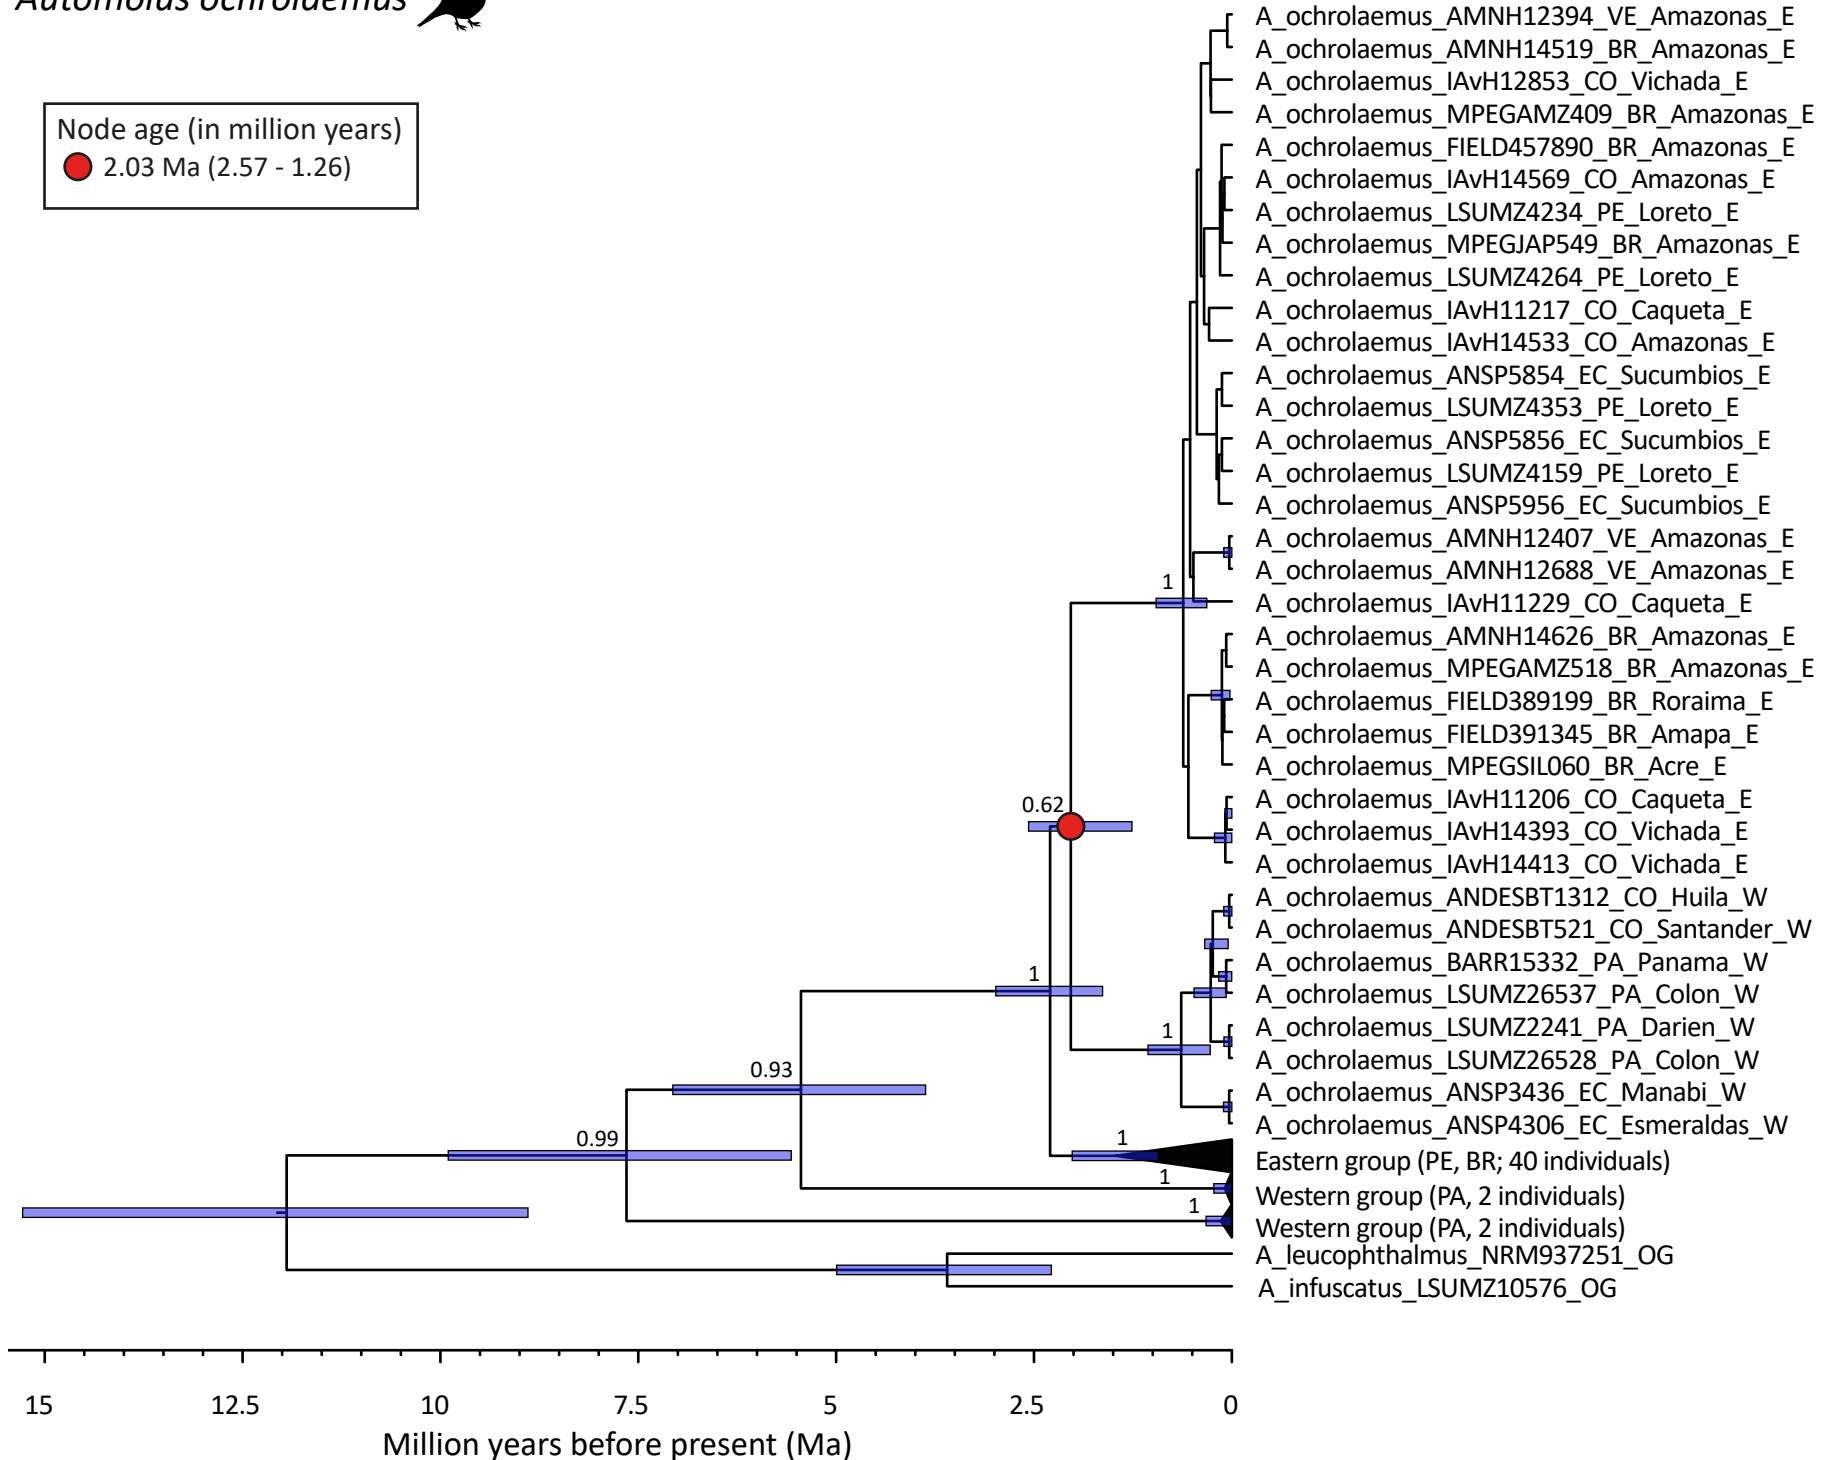

*Chlorophanes spiza*

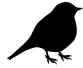

Node age (in million years)  
● 0.78 Ma (No 95% CI)

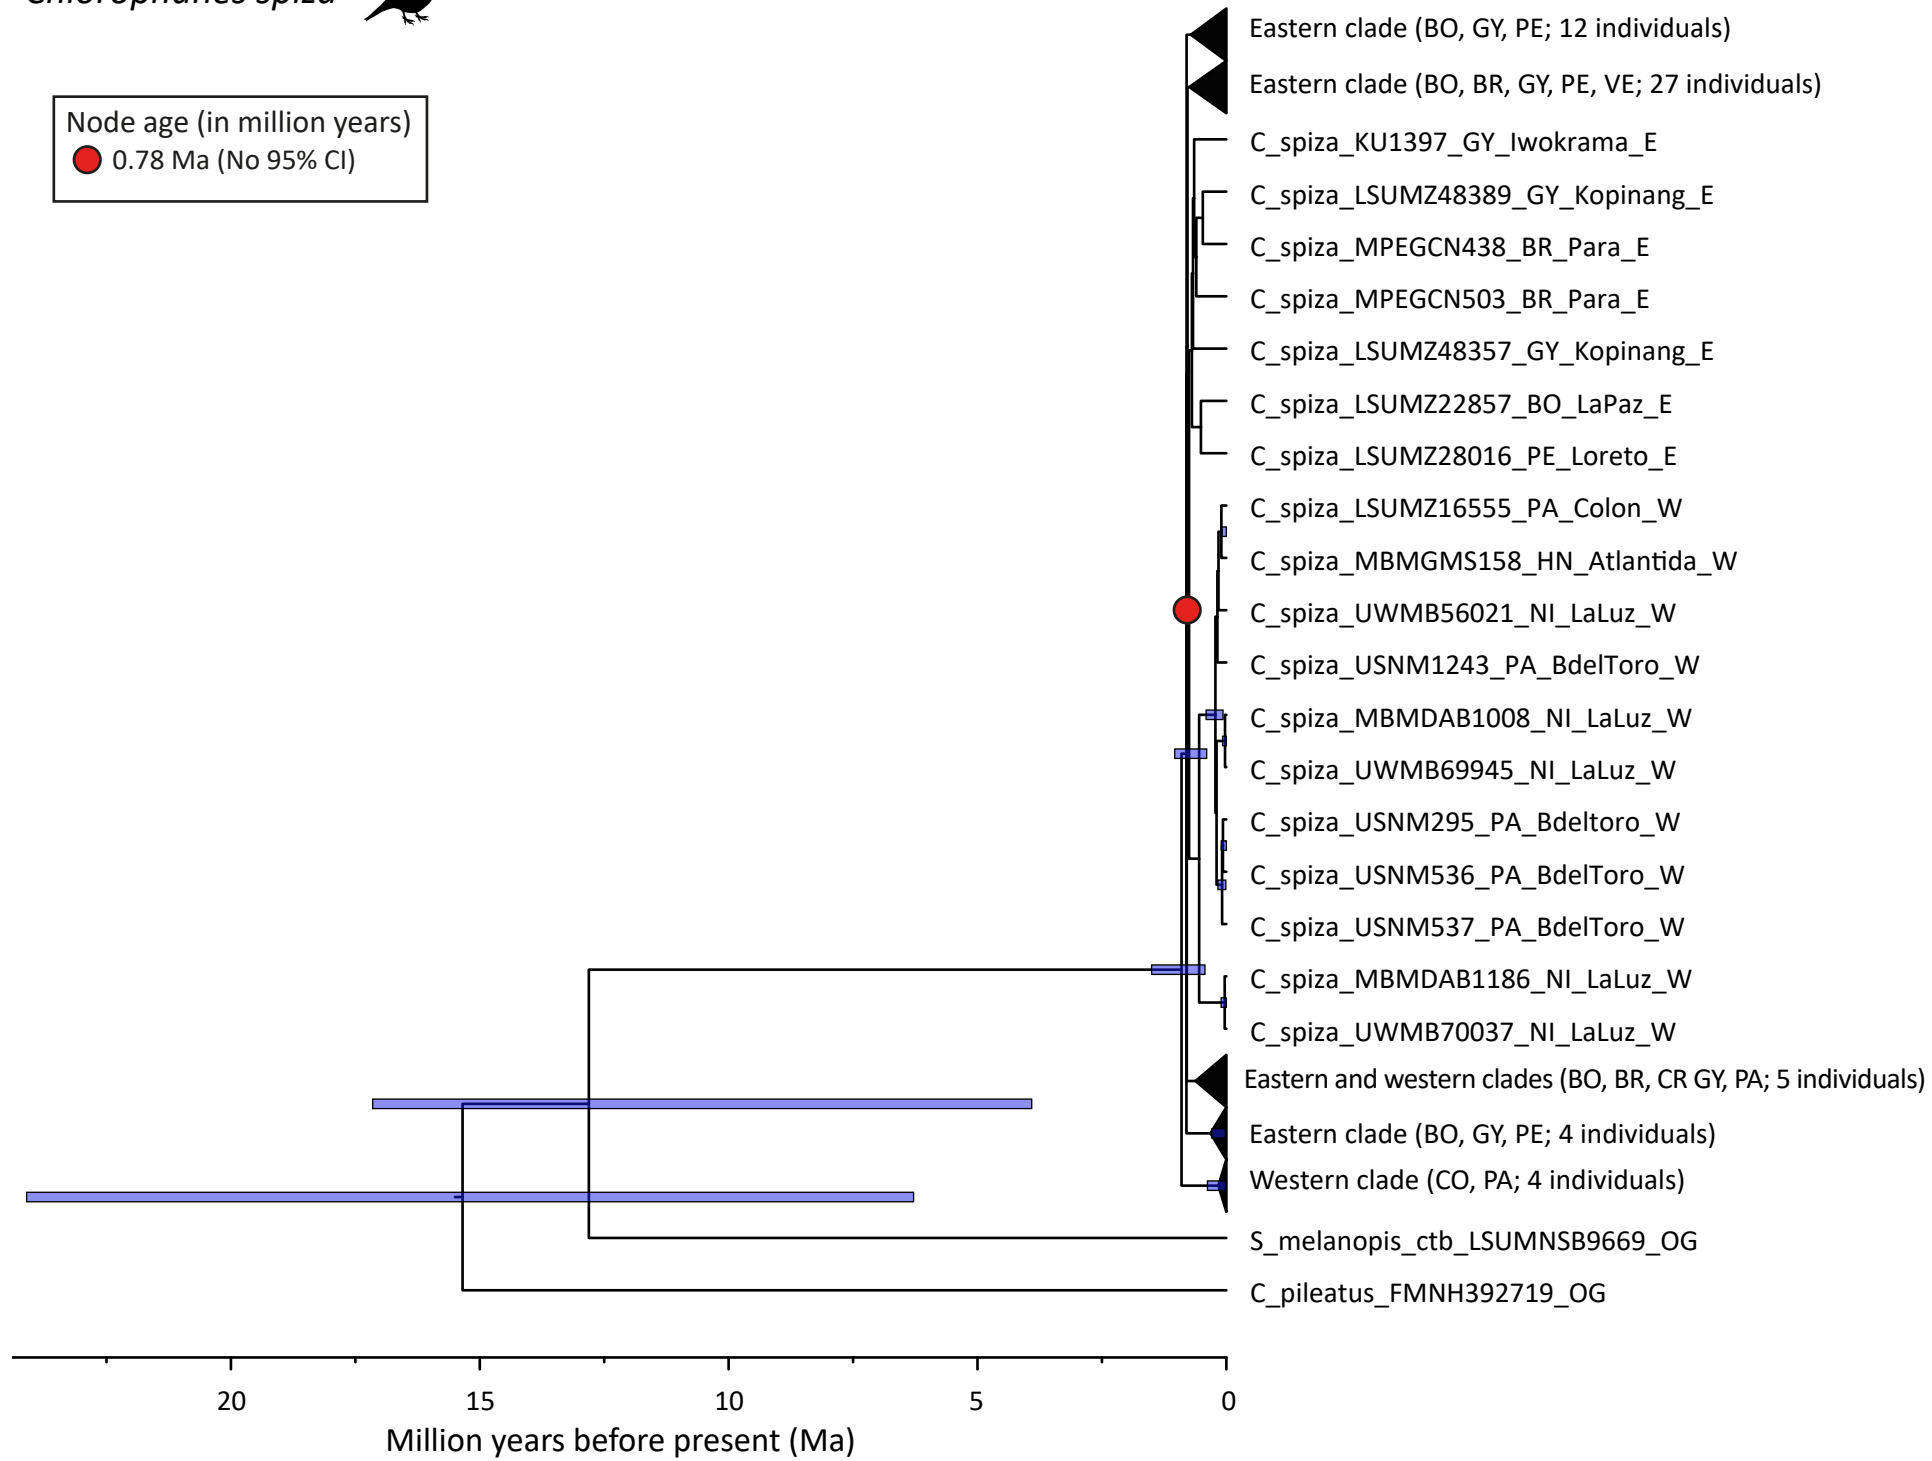



*Colonia colonus* 

Node age (in million years)  
 5.51 Ma (7.65 - 3.33)

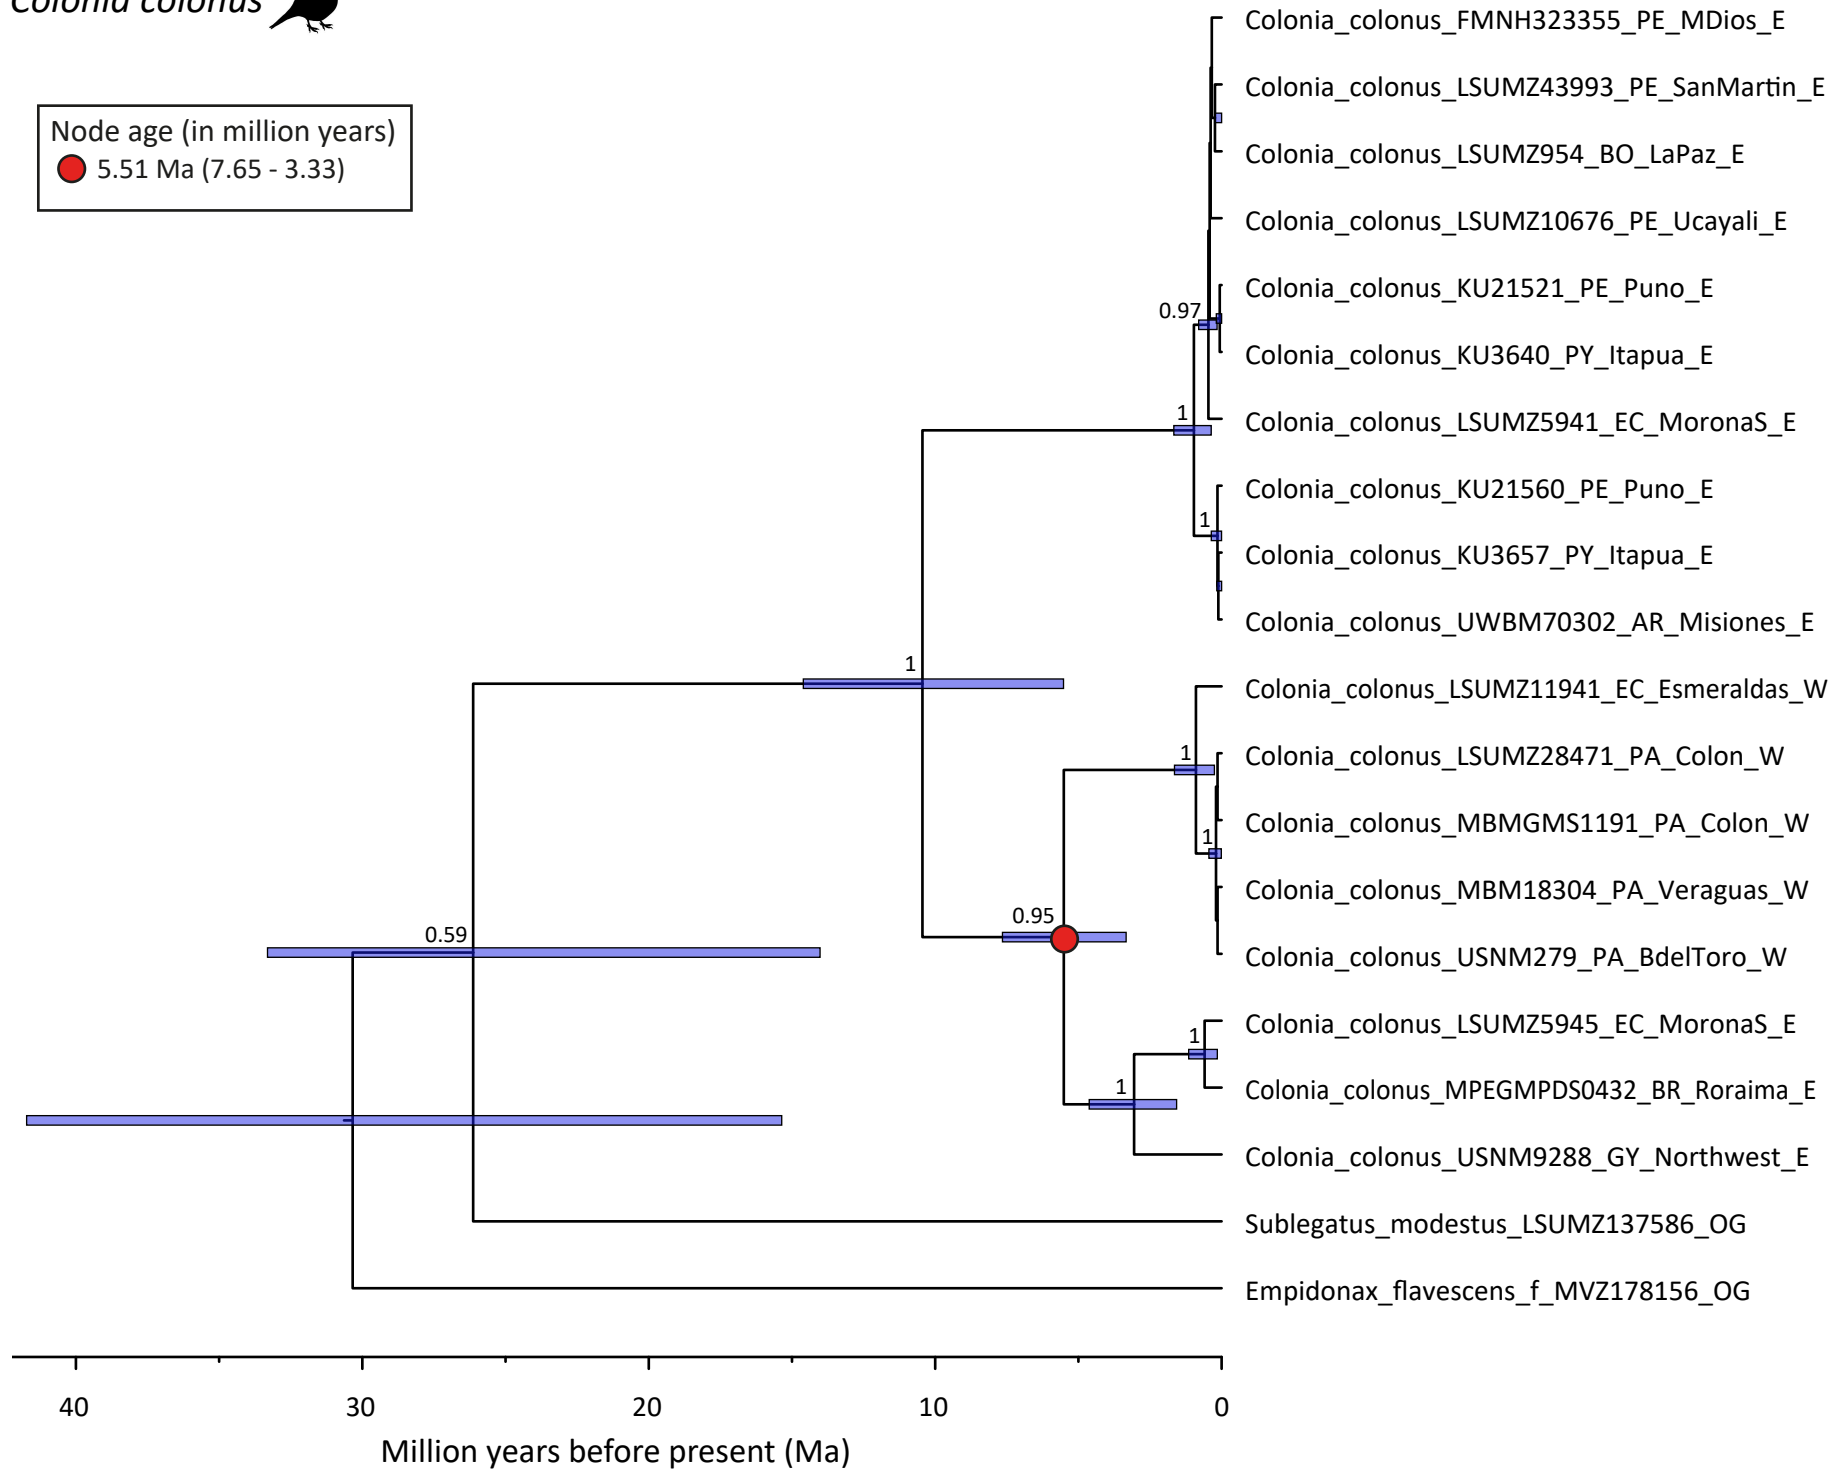

*Cyanerpes caeruleus* 

Node age (in million years)  
 2.44 Ma (3.57 - 1.36)

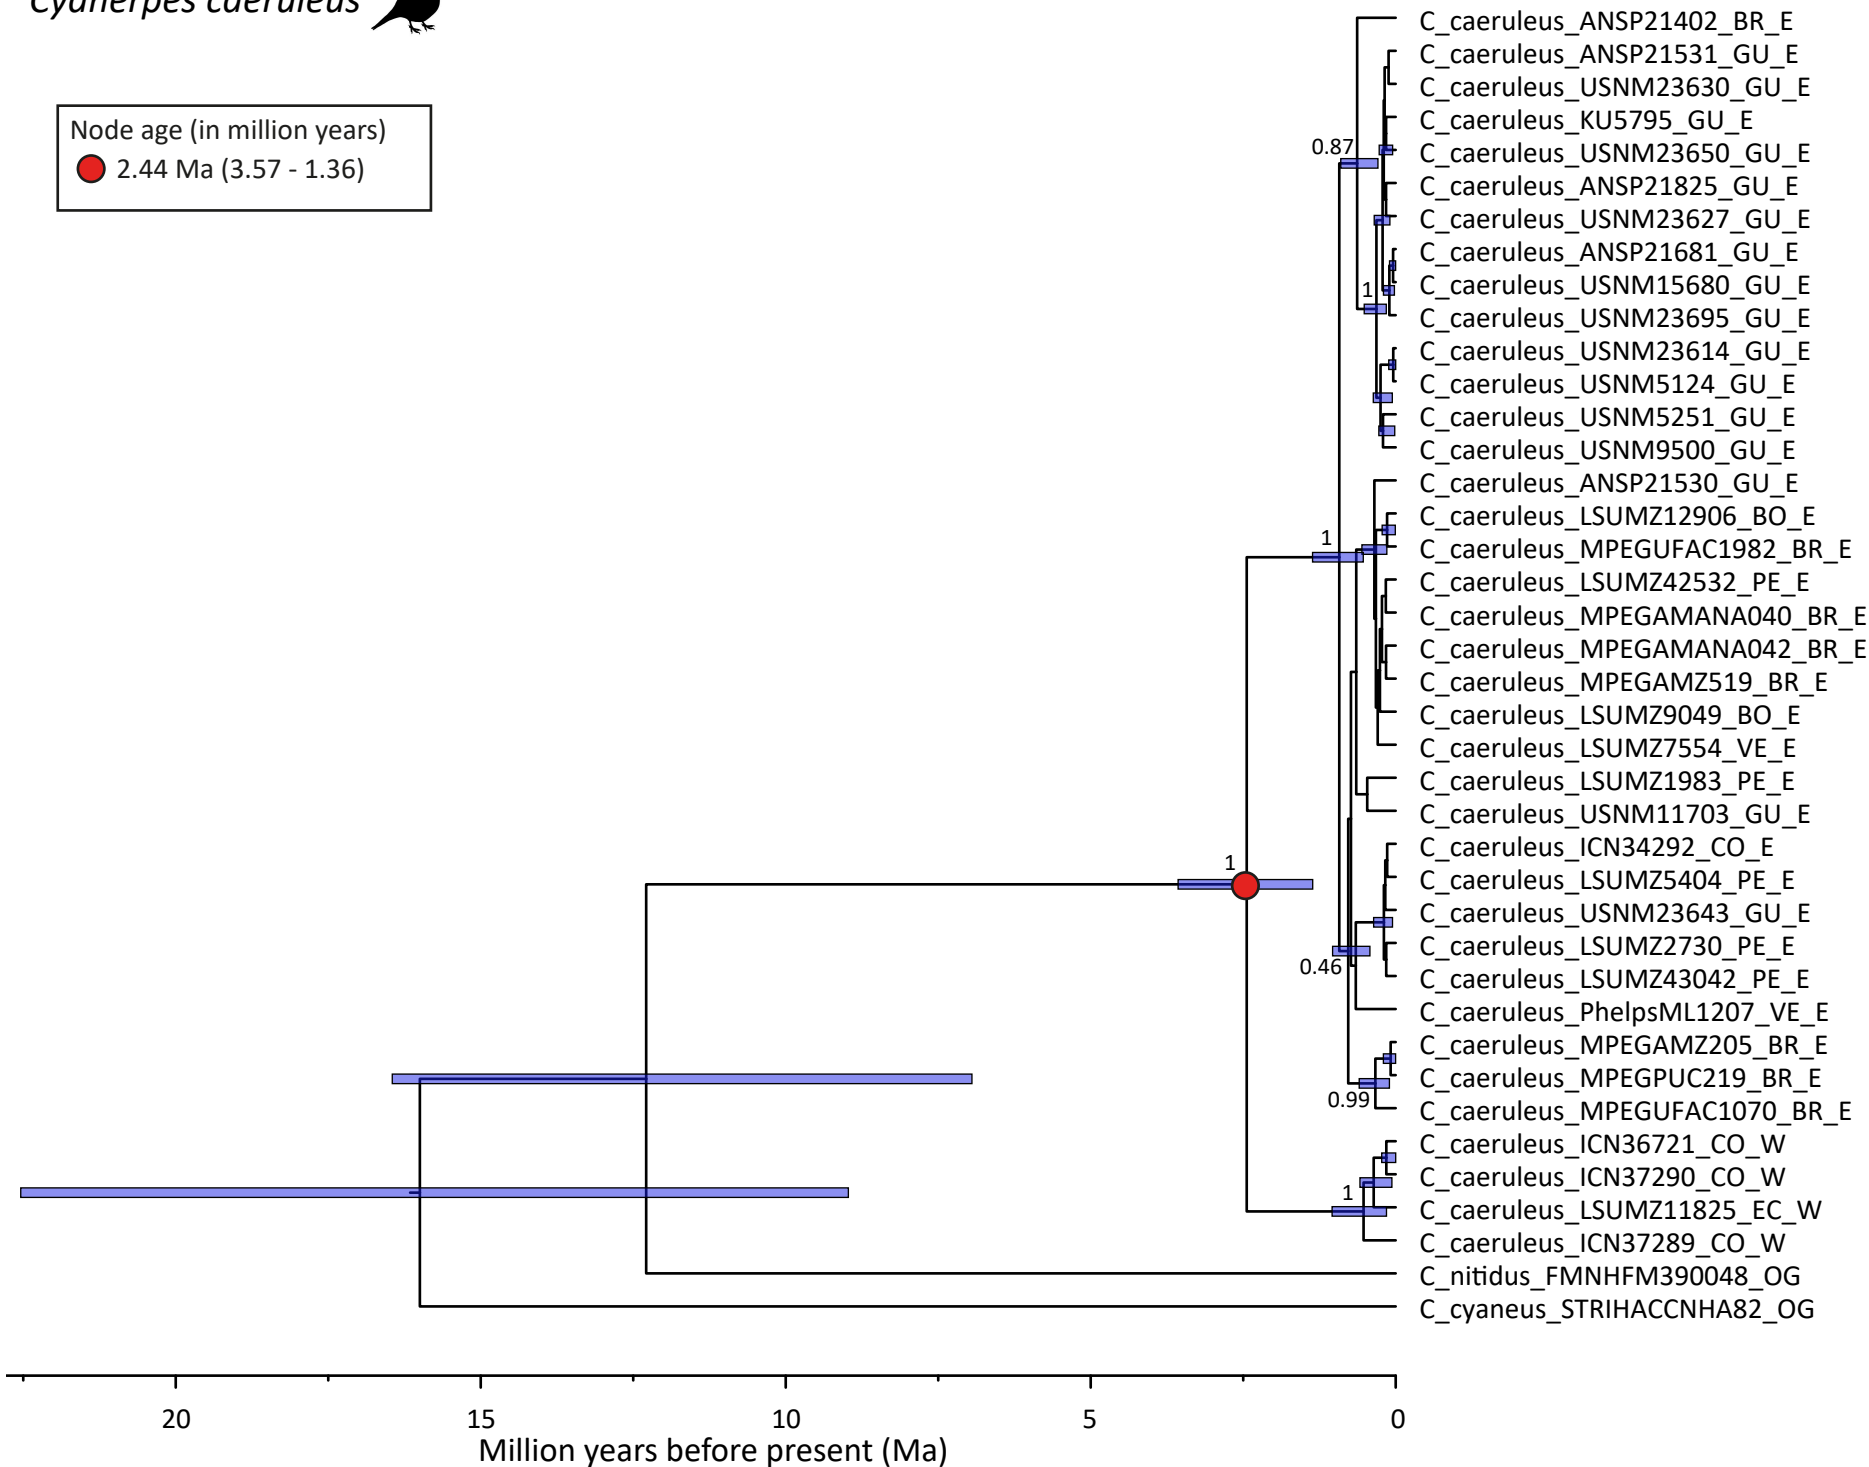

*Cymbilaimus lineatus*

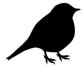

Node age (in million years)  
 ● 1.16 Ma (1.65 - 0.71)

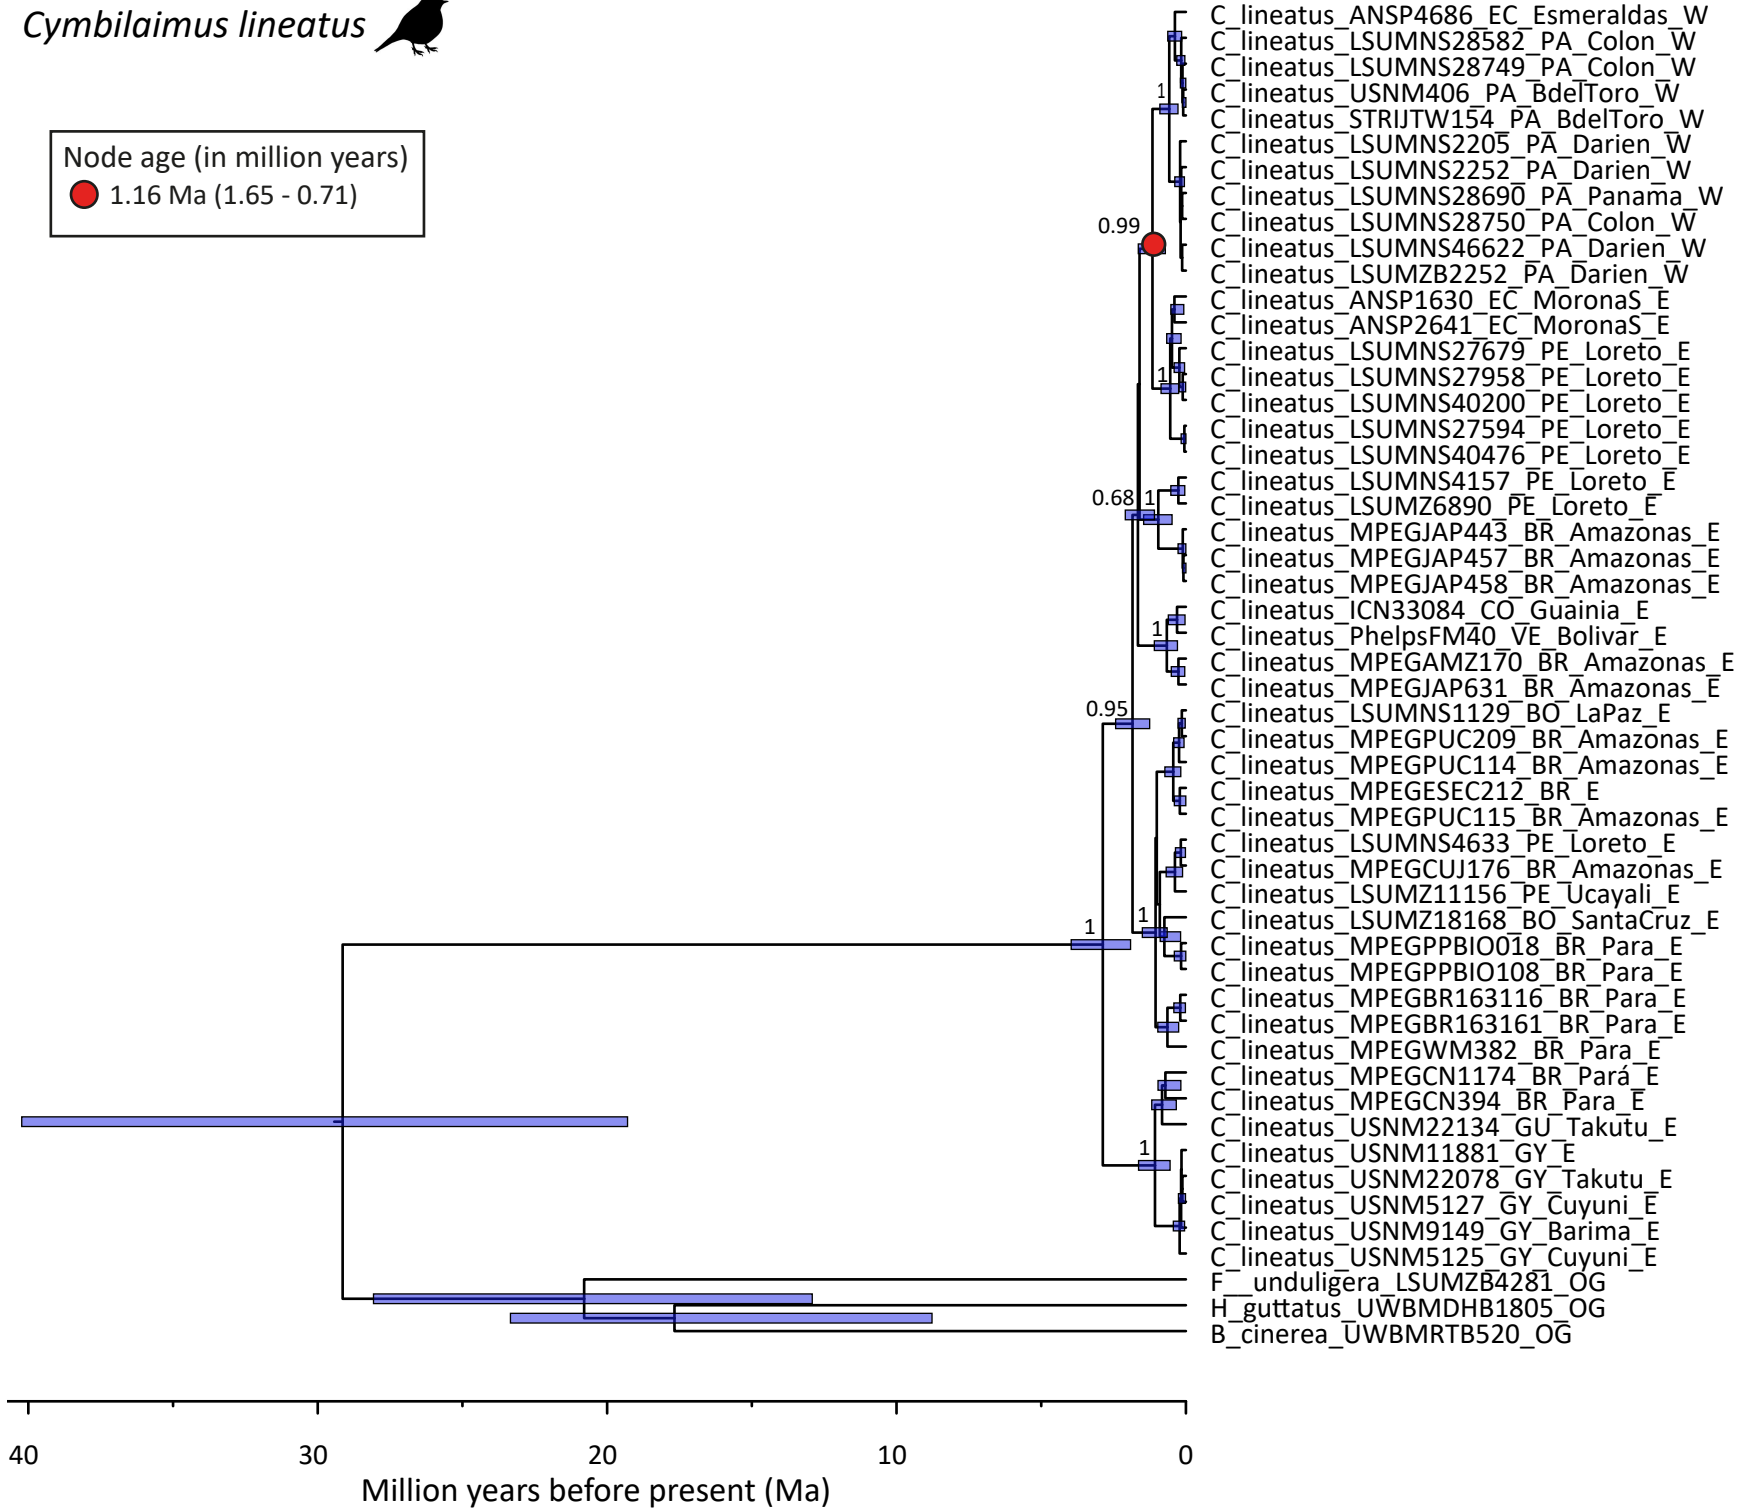

*Glyphorynchus spirurus*

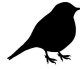

Node age (in million years)

● 0.88 Ma (1.13 - 0.5)

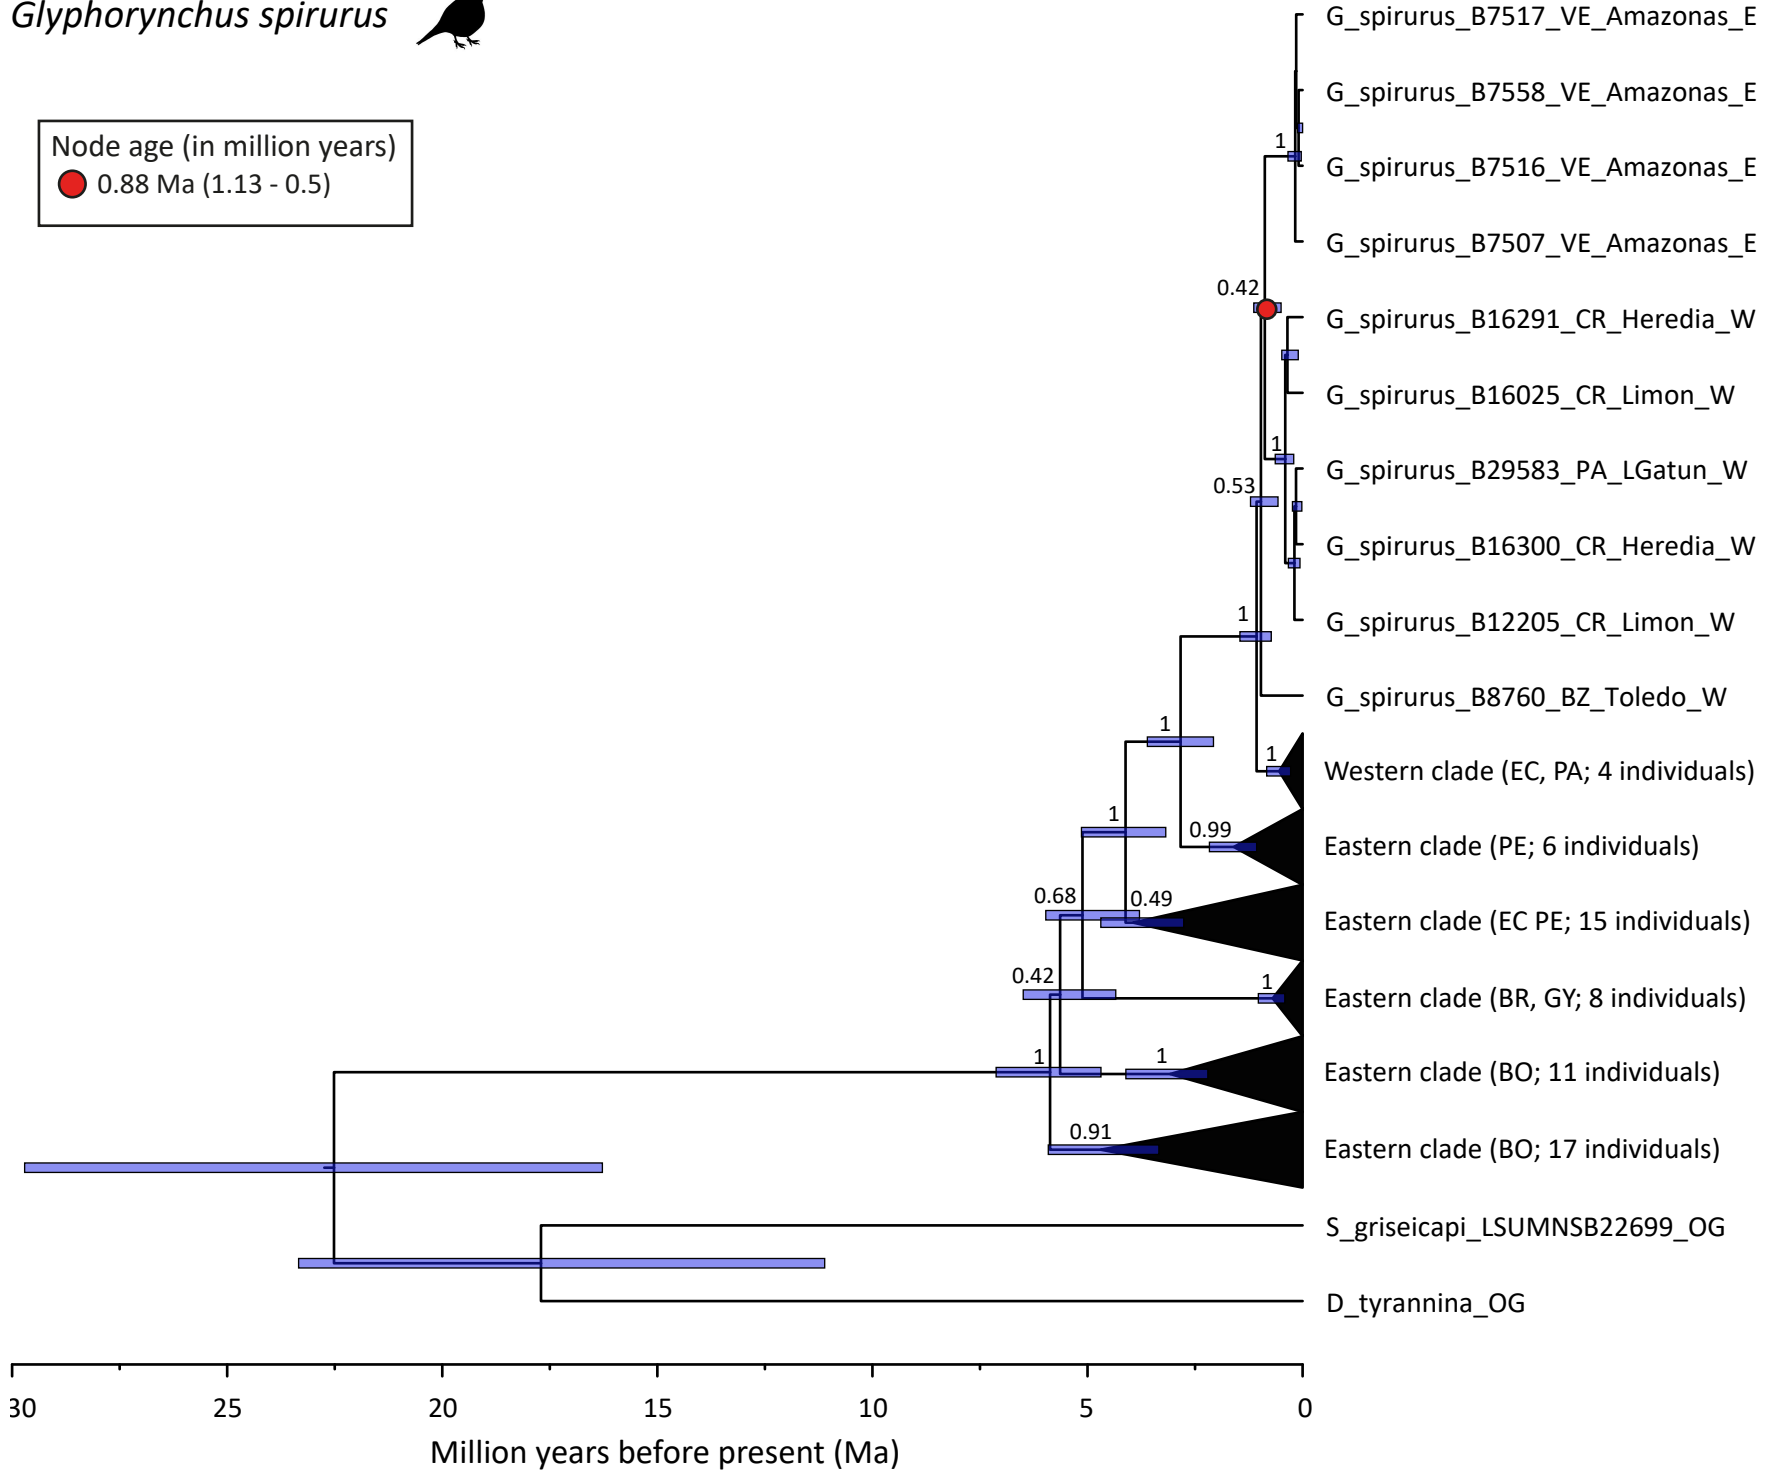







*Microcerculus marginatus*

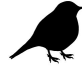

Node age (in million years)

● 1.33 Ma (1.87 - 0.87)

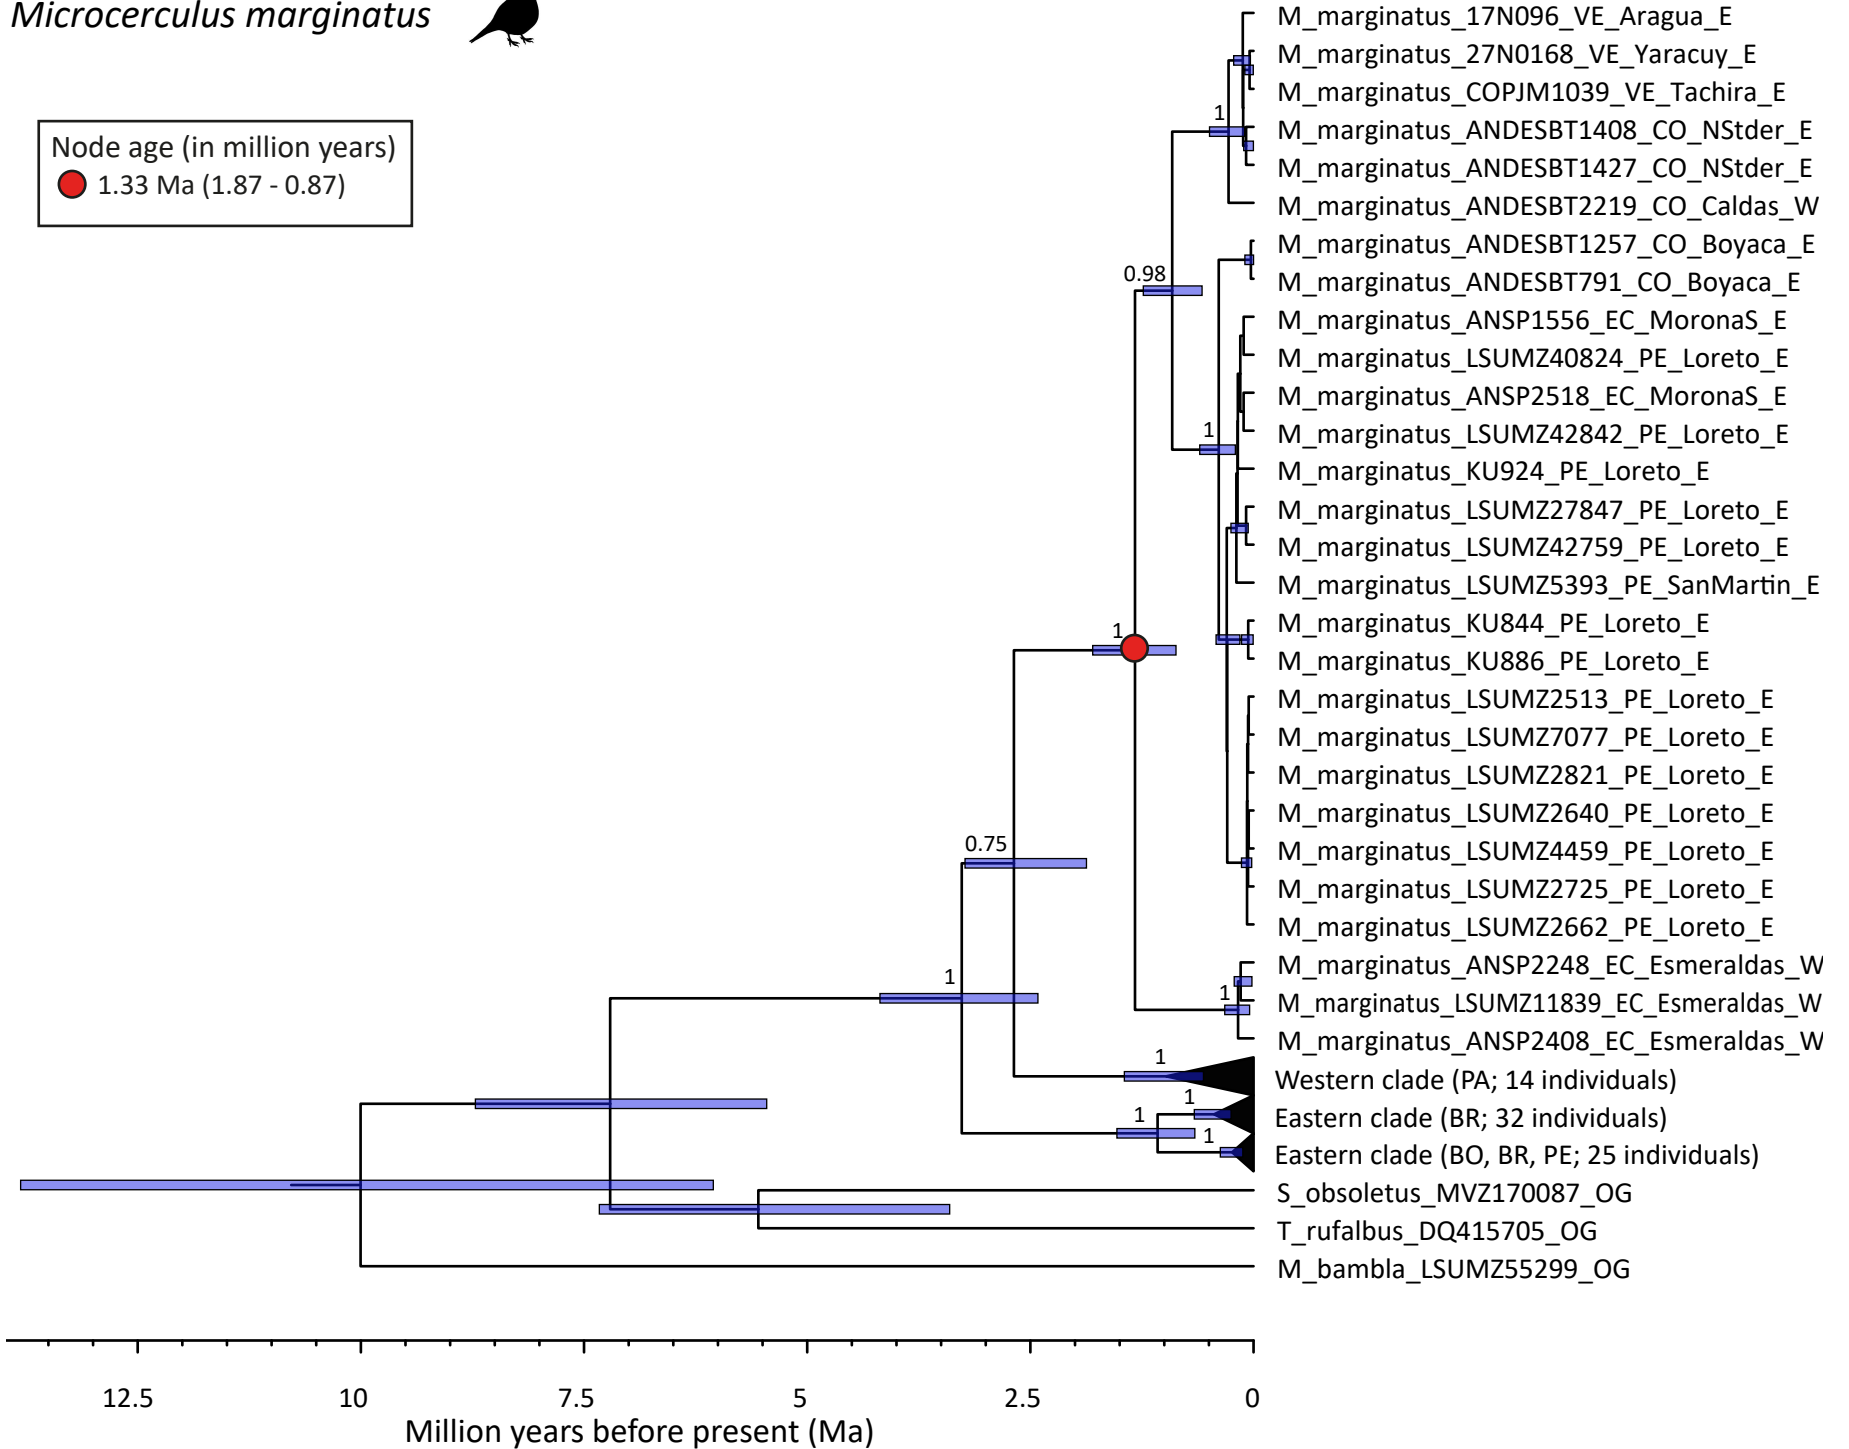



*Mionectes oleagineus* 

Node age (in million years)  
 1.54 Ma (2.05 - 1.04)

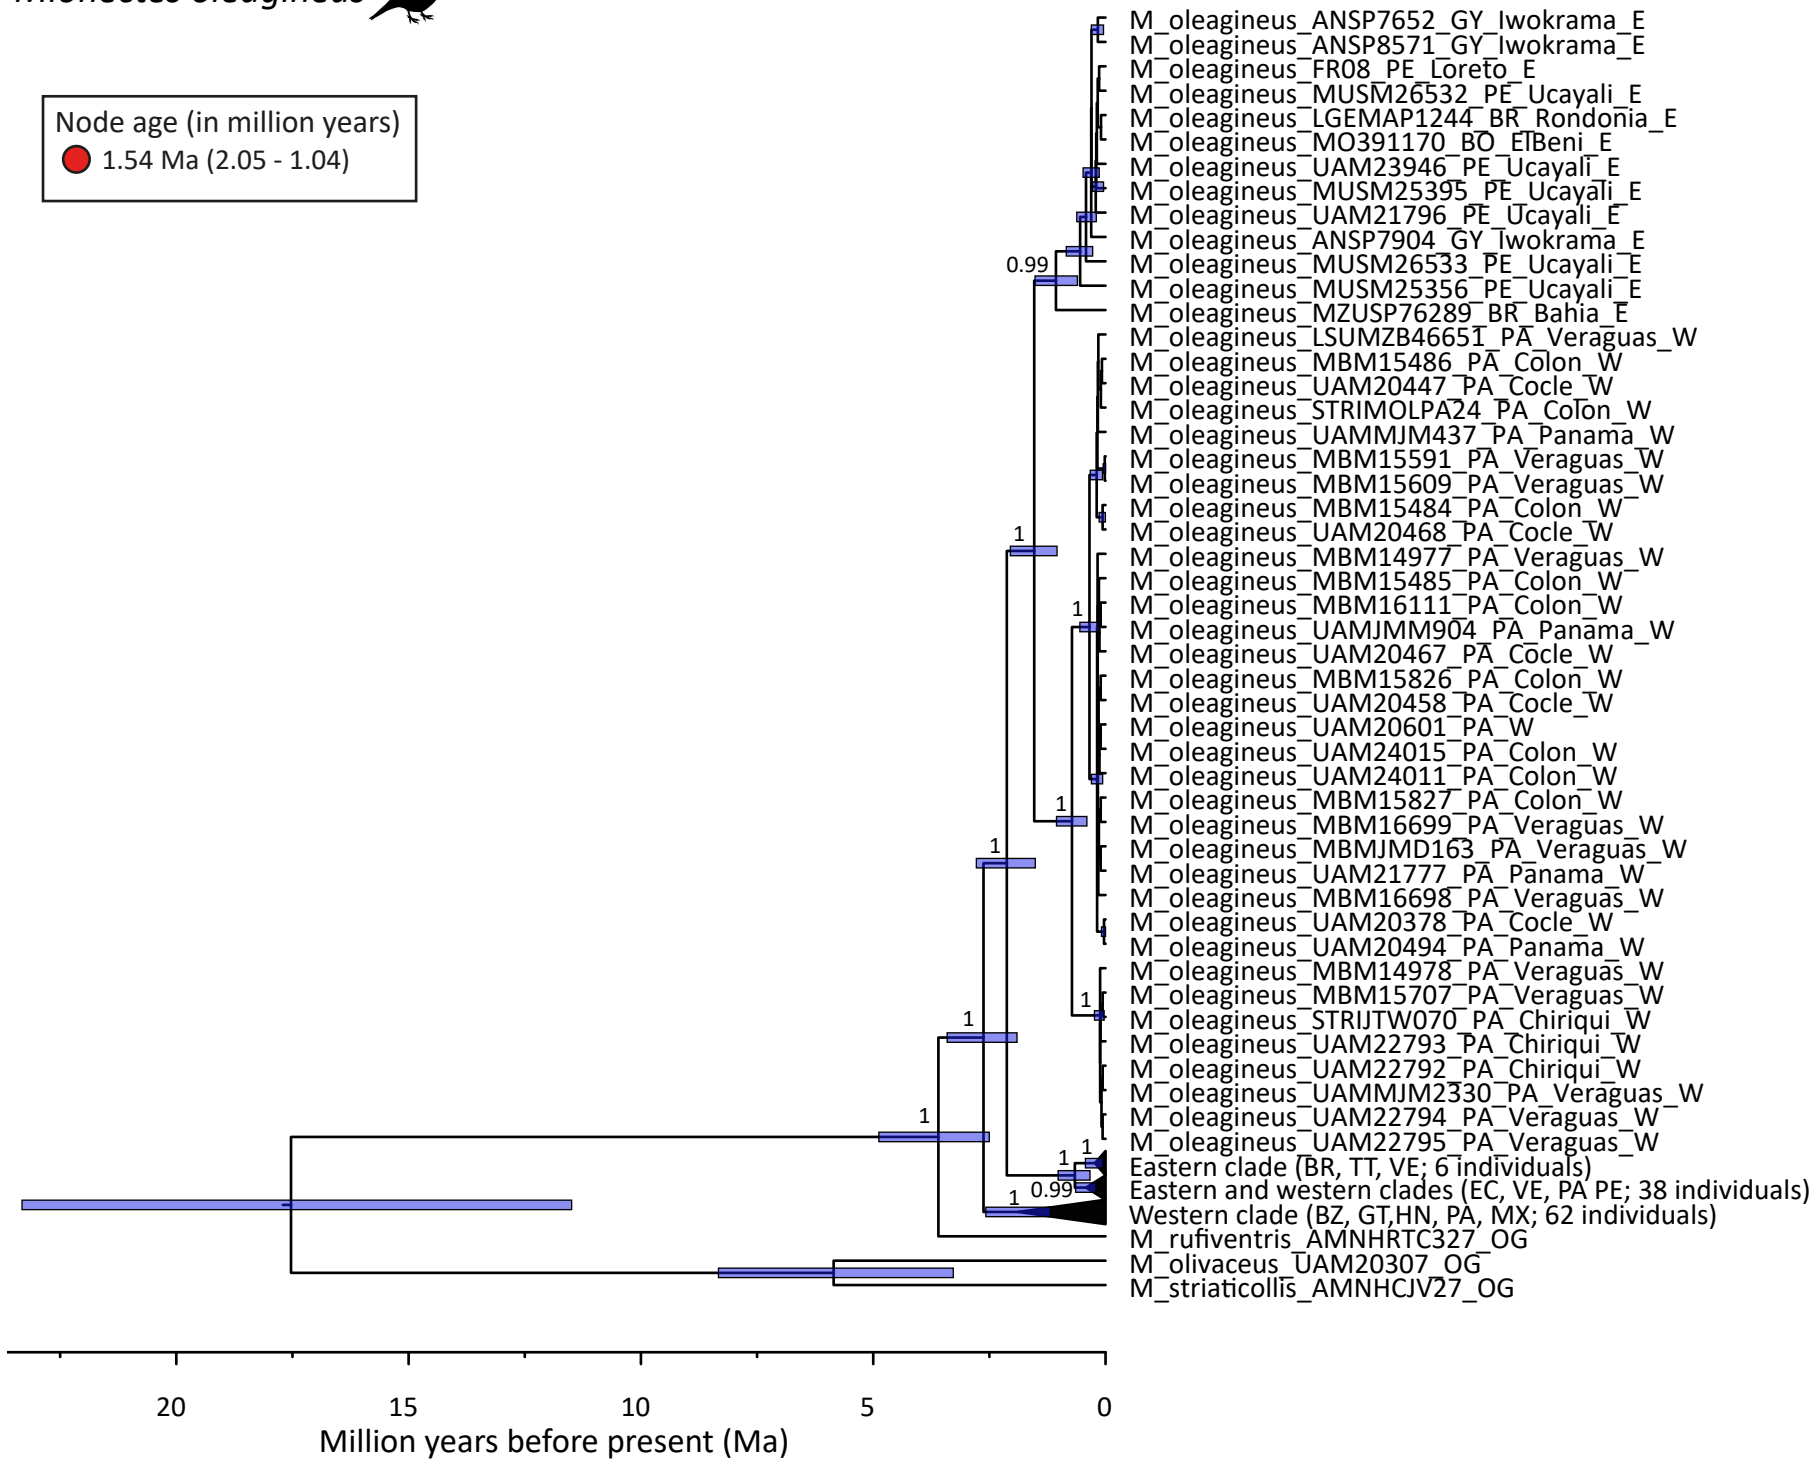

*Querula purpurata*

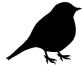

Node age (in million years)  
● 0.73 Ma (1.31 - 0.29)

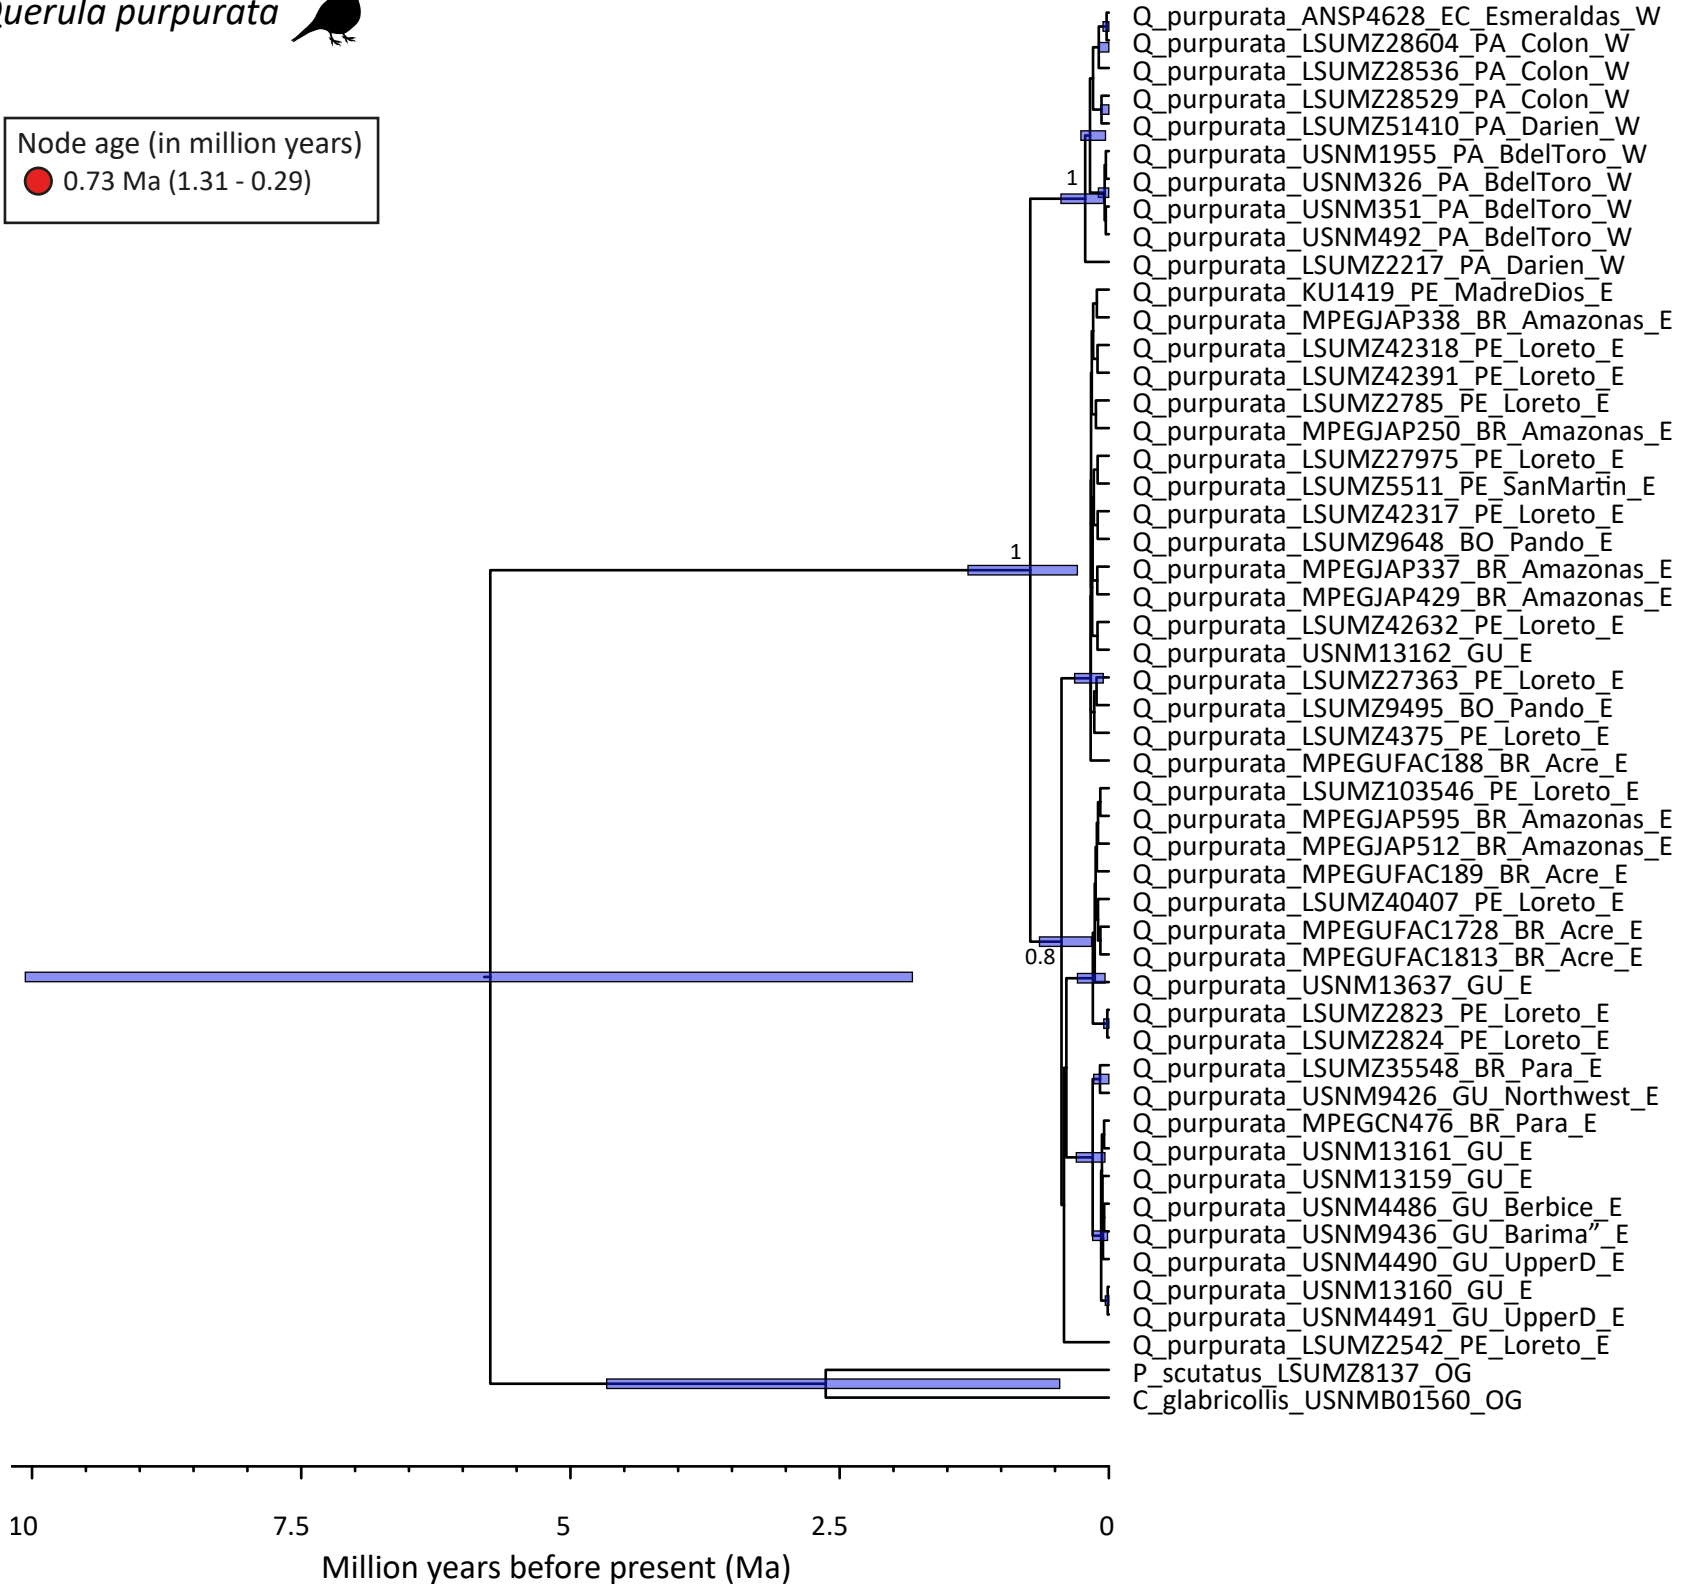

*Saltator maximus* 

Node age (in million years)  
 2.36 Ma (2. - 1.46)

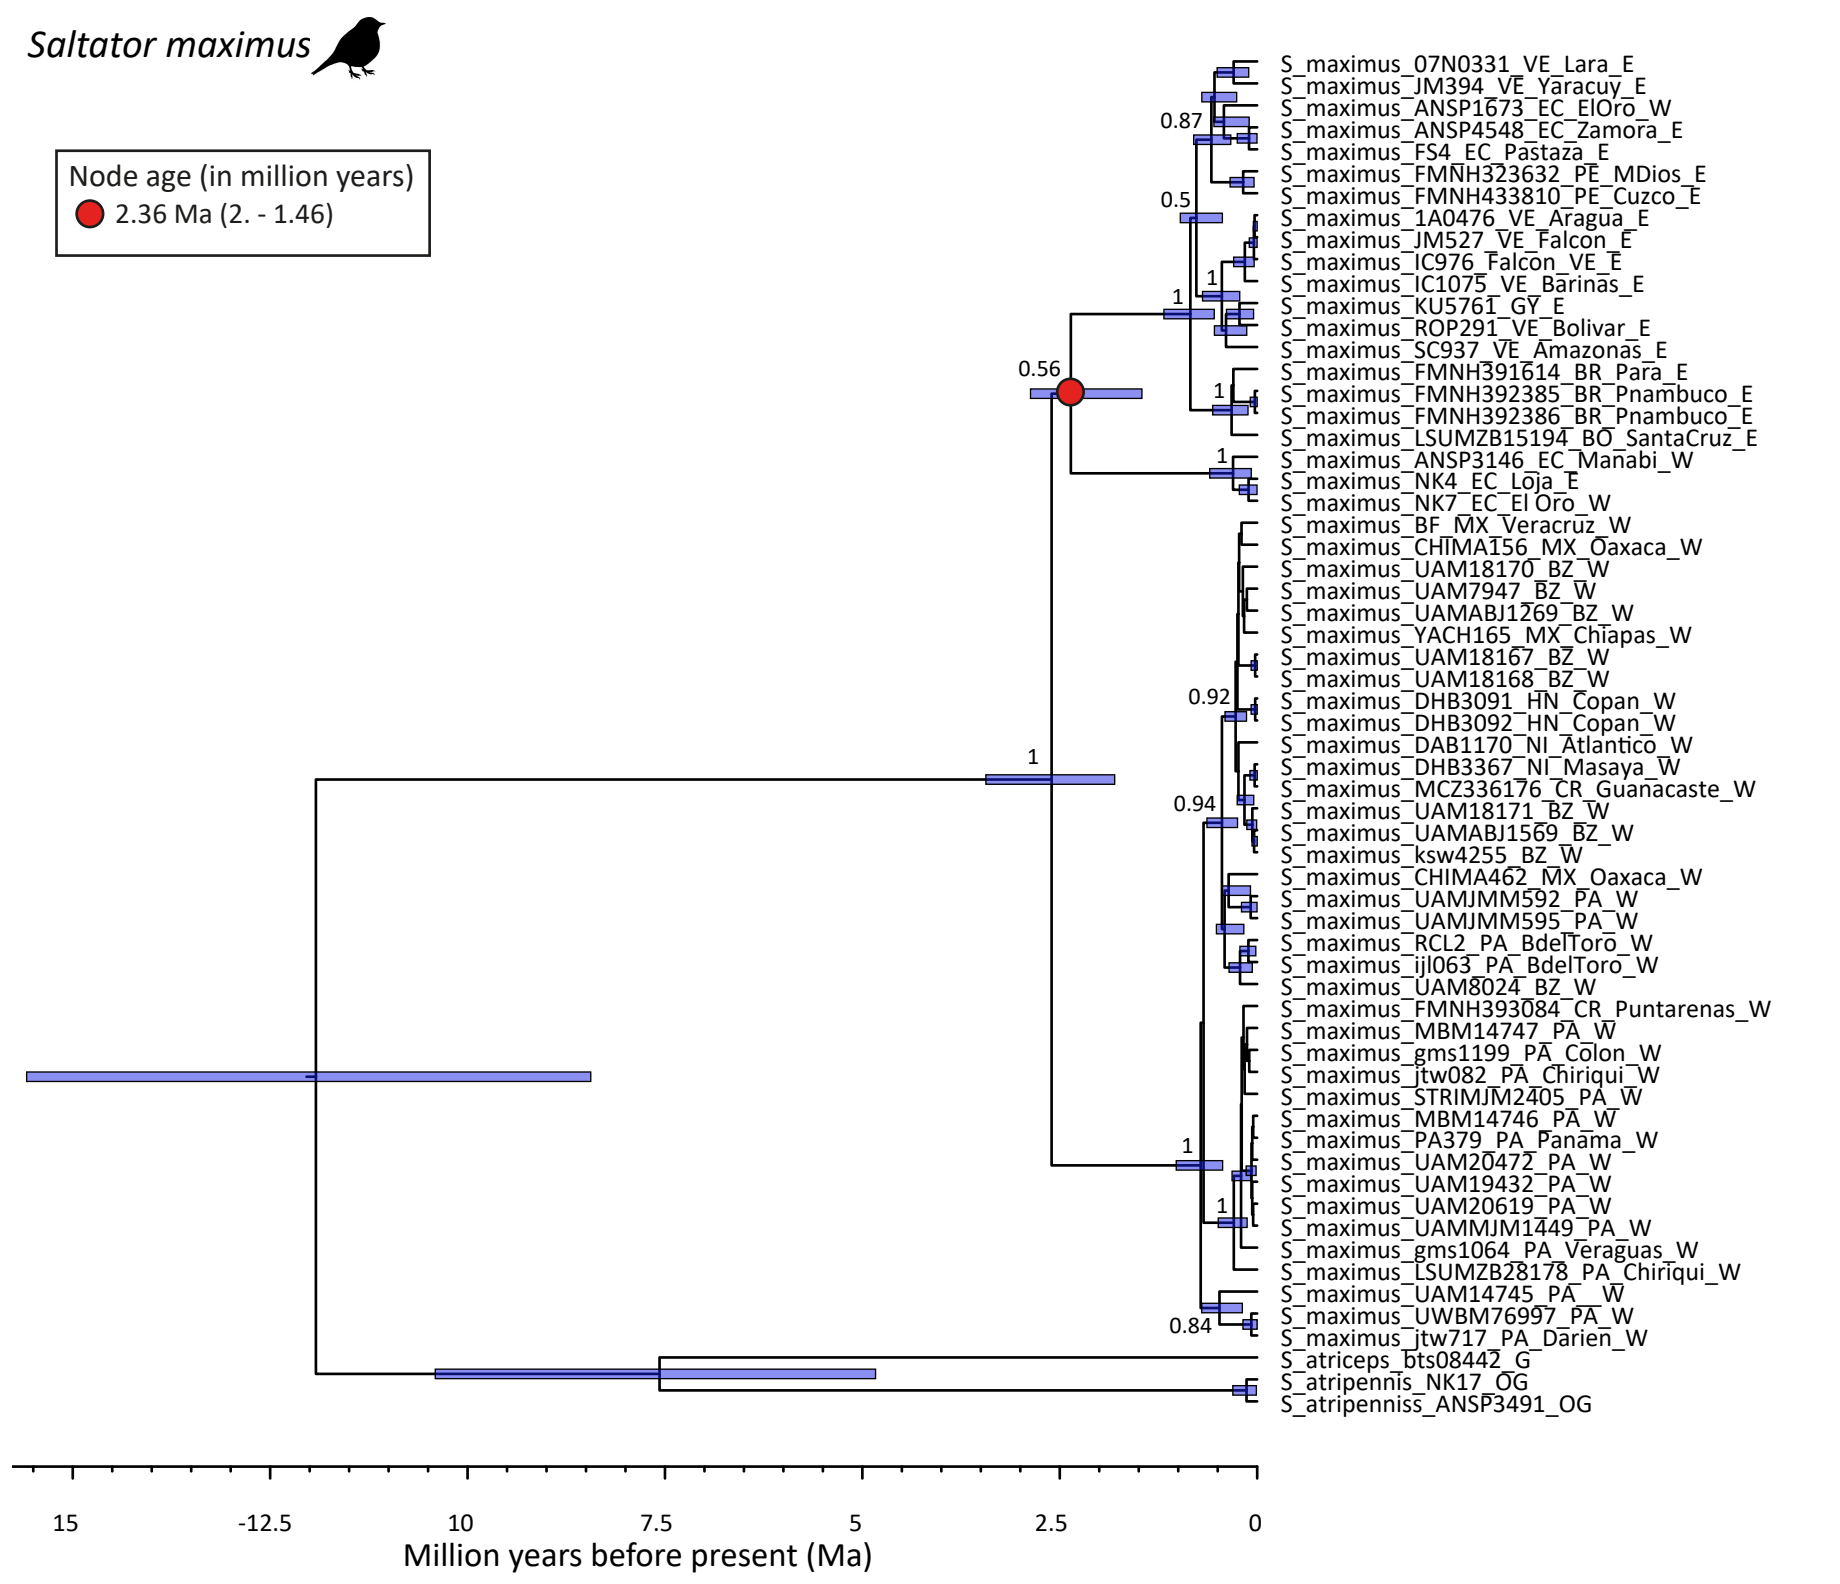

- S\_maximus\_07N0331\_VE\_Lara\_E
- S\_maximus\_JM394\_VE\_Yaracuy\_E
- S\_maximus\_ANSP1673\_EC\_ElOro\_W
- S\_maximus\_ANSP4548\_EC\_Zamora\_E
- S\_maximus\_FS4\_EC\_Pastaza\_E
- S\_maximus\_FMNH323632\_PE\_MDios\_E
- S\_maximus\_FMNH433810\_PE\_Cuzco\_E
- S\_maximus\_1A0476\_VE\_Aragua\_E
- S\_maximus\_JM527\_VE\_Falcon\_E
- S\_maximus\_IC976\_Falcon\_VE\_E
- S\_maximus\_IC1075\_VE\_Barinás\_E
- S\_maximus\_KU5761\_GY\_E
- S\_maximus\_ROP291\_VE\_Bolivar\_E
- S\_maximus\_SC937\_VE\_Amazonas\_E
- S\_maximus\_FMNH391614\_BR\_Para\_E
- S\_maximus\_FMNH392385\_BR\_Pnambuco\_E
- S\_maximus\_FMNH392386\_BR\_Pnambuco\_E
- S\_maximus\_LSUMZB15194\_BO\_SantaCruz\_E
- S\_maximus\_ANSP3146\_EC\_Mañabi\_W
- S\_maximus\_NK4\_EC\_Loja\_E
- S\_maximus\_NK7\_EC\_ElOro\_W
- S\_maximus\_BF\_MX\_Veracruz\_W
- S\_maximus\_CHIMA156\_MX\_Oaxaca\_W
- S\_maximus\_UAM18170\_BZ\_W
- S\_maximus\_UAM7947\_BZ\_W
- S\_maximus\_UAMABJ1269\_BZ\_W
- S\_maximus\_YACH165\_MX\_Chiapas\_W
- S\_maximus\_UAM18167\_BZ\_W
- S\_maximus\_UAM18168\_BZ\_W
- S\_maximus\_DHB3091\_HN\_Copan\_W
- S\_maximus\_DHB3092\_HN\_Copan\_W
- S\_maximus\_DAB1170\_NI\_Atlantico\_W
- S\_maximus\_DHB3367\_NI\_Masaya\_W
- S\_maximus\_MCZ336176\_CR\_Guanacaste\_W
- S\_maximus\_UAM18171\_BZ\_W
- S\_maximus\_UAMABJ1569\_BZ\_W
- S\_maximus\_ksw4255\_BZ\_W
- S\_maximus\_CHIMA462\_MX\_Oaxaca\_W
- S\_maximus\_UAMJMM592\_PA\_W
- S\_maximus\_UAMJMM595\_PA\_W
- S\_maximus\_RCL2\_PA\_BdelToró\_W
- S\_maximus\_ijkl063\_PA\_BdelToró\_W
- S\_maximus\_UAM8024\_BZ\_W
- S\_maximus\_FMNH393084\_CR\_Puntarenas\_W
- S\_maximus\_MBM14747\_PA\_W
- S\_maximus\_gms1199\_PA\_Colon\_W
- S\_maximus\_jtw082\_PA\_Chiriqui\_W
- S\_maximus\_STRIMJM2405\_PA\_W
- S\_maximus\_MBM14746\_PA\_W
- S\_maximus\_PA379\_PA\_Panama\_W
- S\_maximus\_UAM20472\_PA\_W
- S\_maximus\_UAM19432\_PA\_W
- S\_maximus\_UAM20619\_PA\_W
- S\_maximus\_UAMMJM1449\_PA\_W
- S\_maximus\_gms1064\_PA\_Veraguas\_W
- S\_maximus\_LSUMZB28178\_PA\_Chiriqui\_W
- S\_maximus\_UAM14745\_PA\_W
- S\_maximus\_UWBM76997\_PA\_W
- S\_maximus\_jtw717\_PA\_Darien\_W
- S\_atriceps\_bts08442\_G
- S\_atripennis\_NK17\_OG
- S\_atripennis\_ANSP3491\_OG

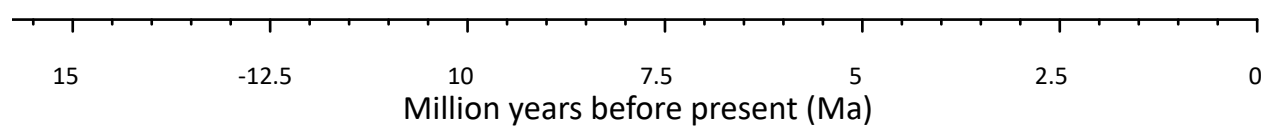

*Schiffornis turdina*

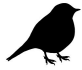

Node age (in million years)  
● 2.07 Ma (1.05 - 2.8)

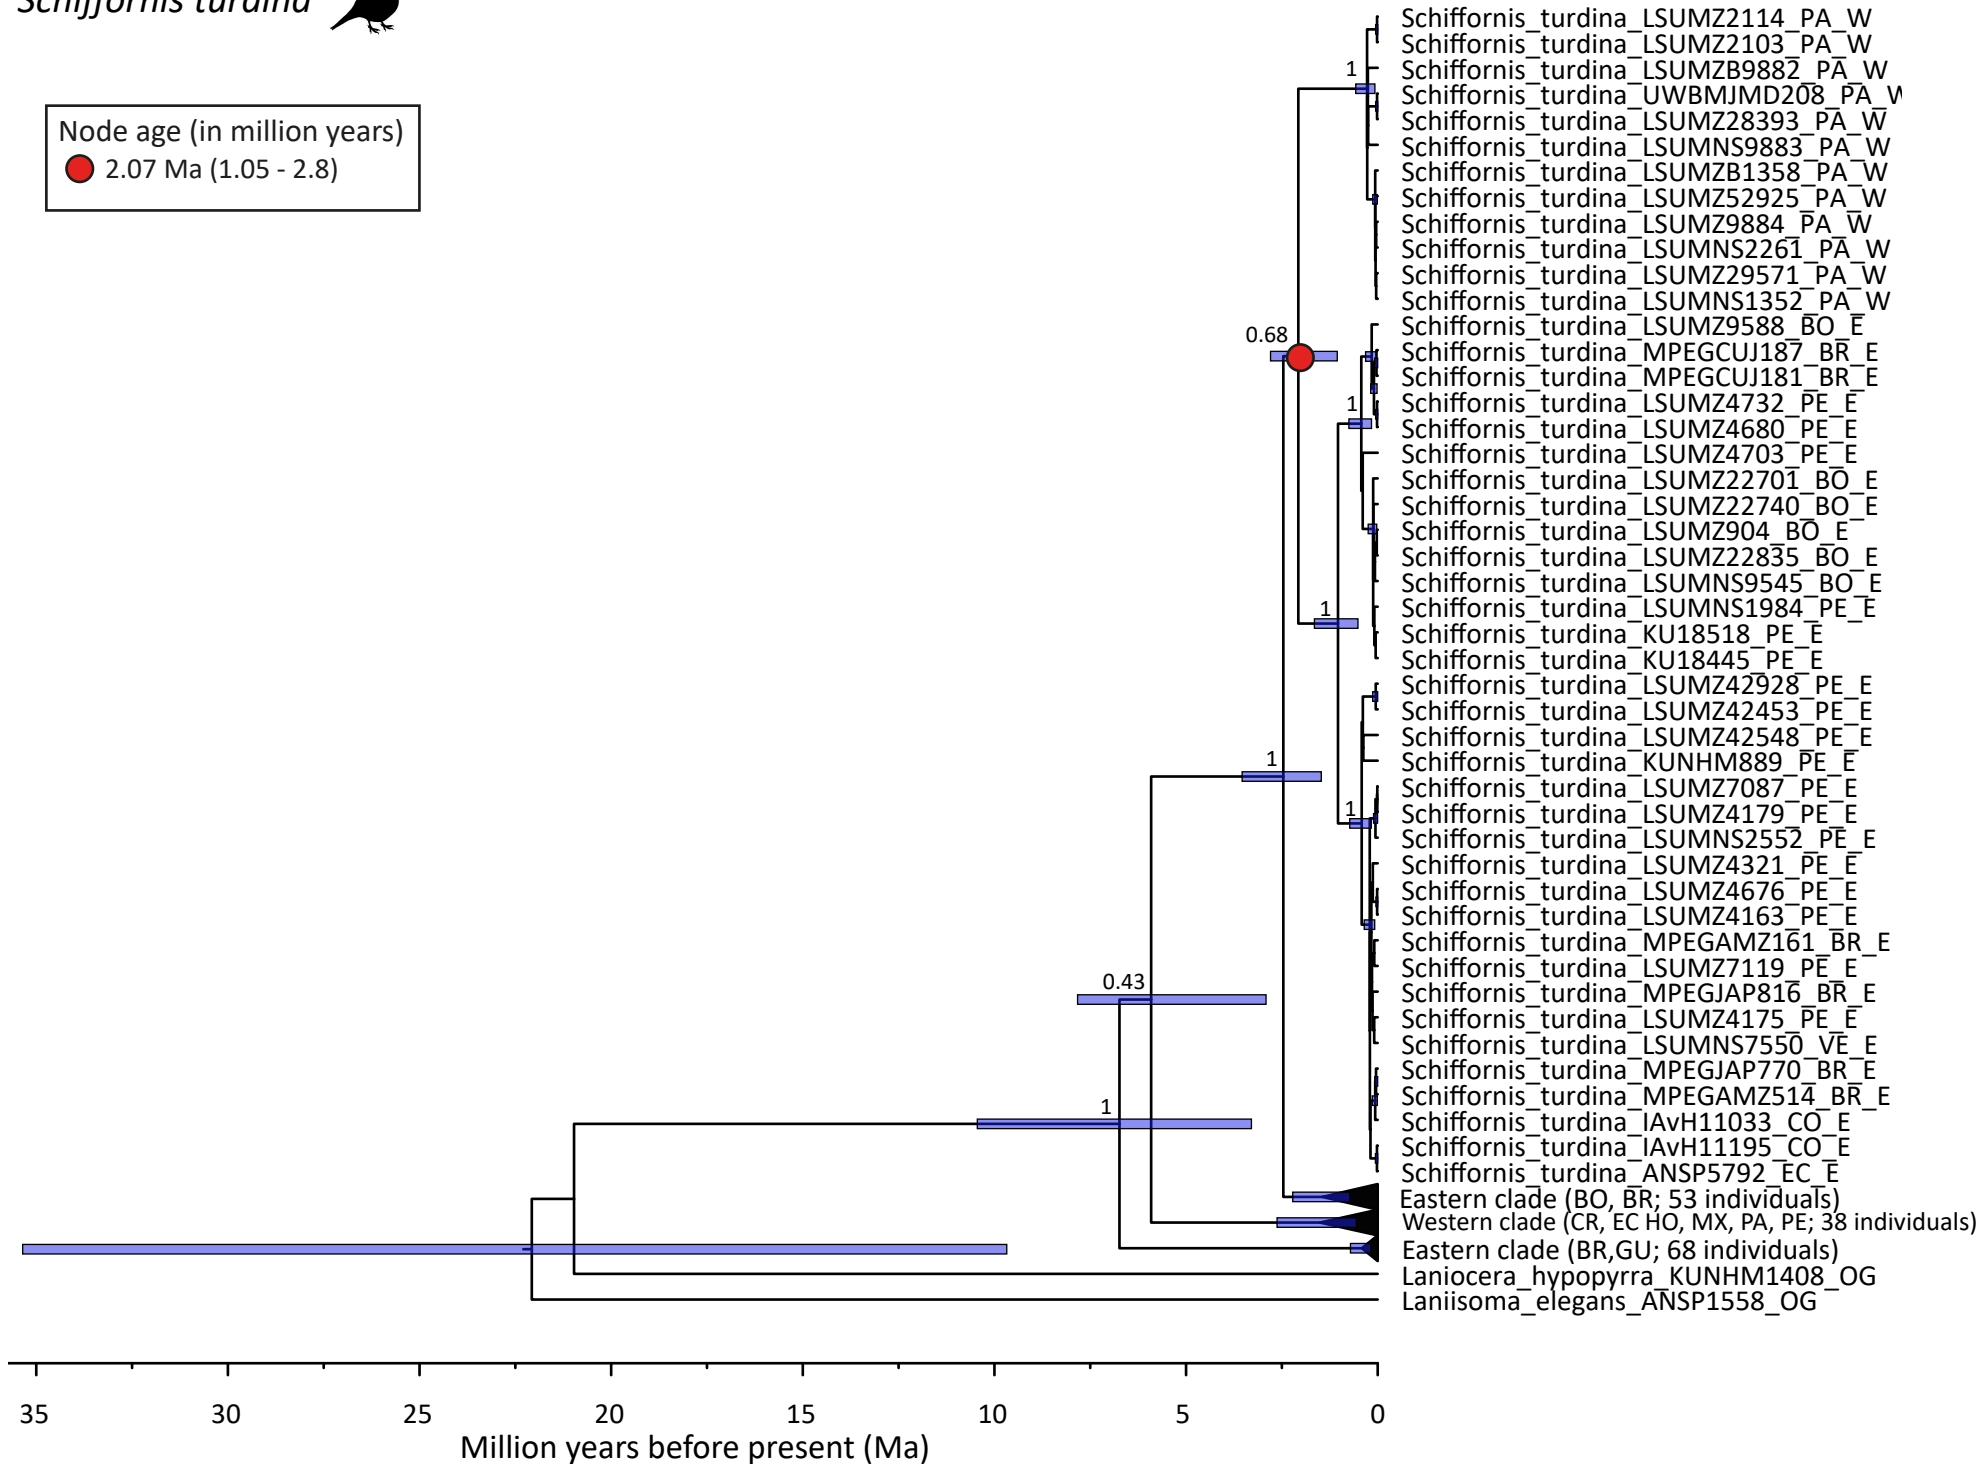

*Sclerurus mexicanus* 

Node age (in million years)  
 1.32 Ma (2.03 - 0.7)

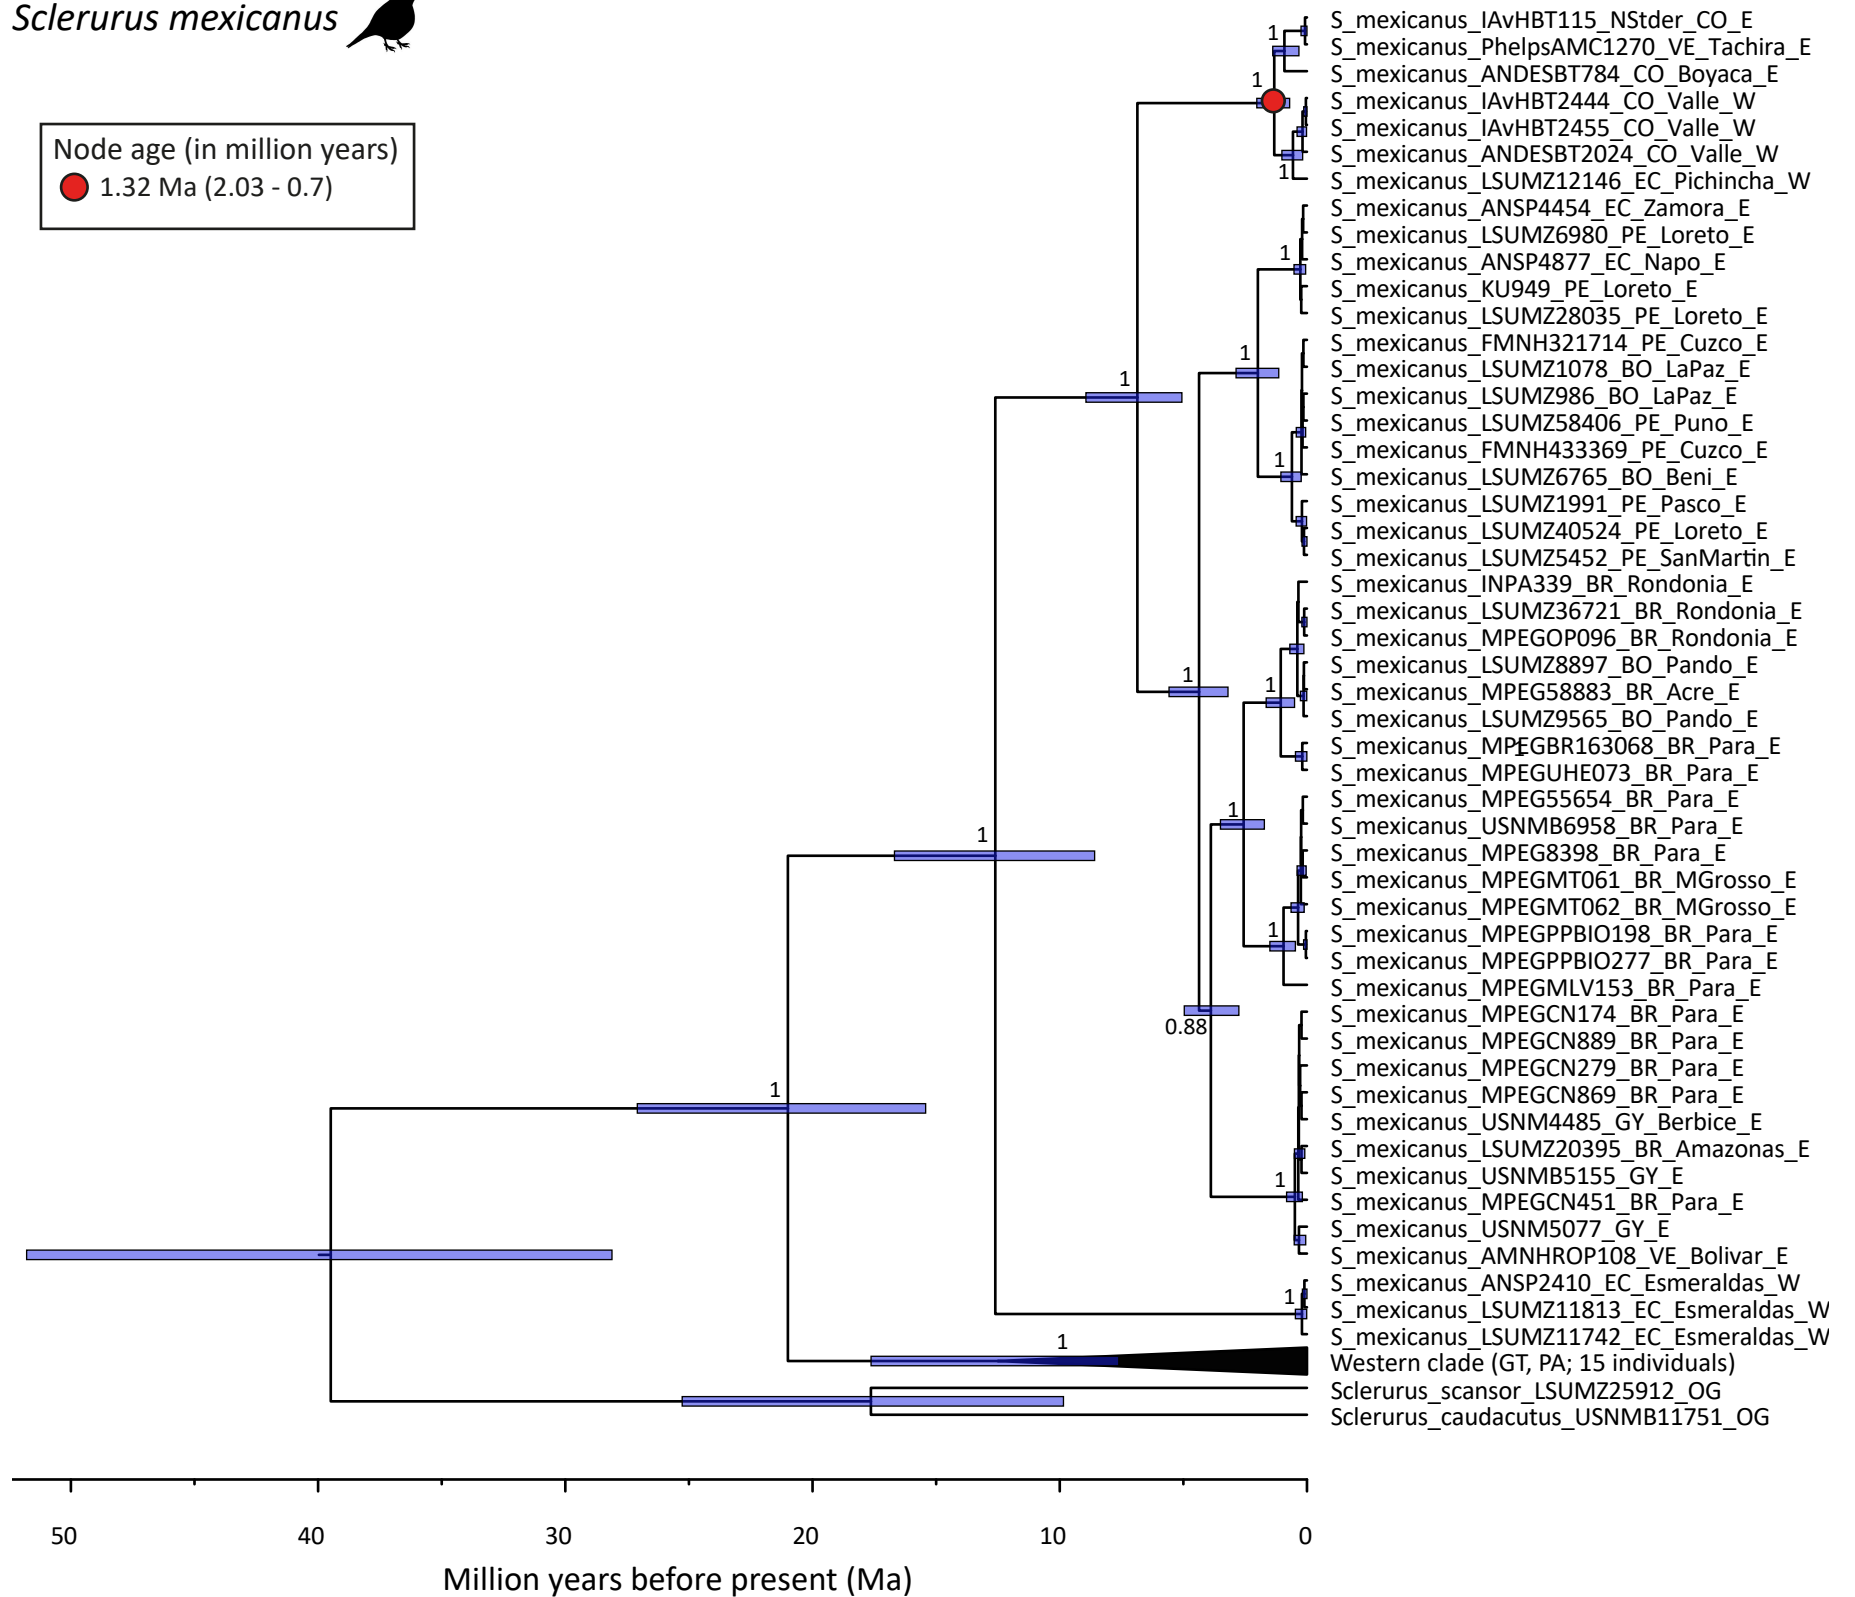

*Tersina viridis*

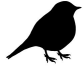

Node age (in million years)

● 0.88 Ma (1.3 - 0.5)

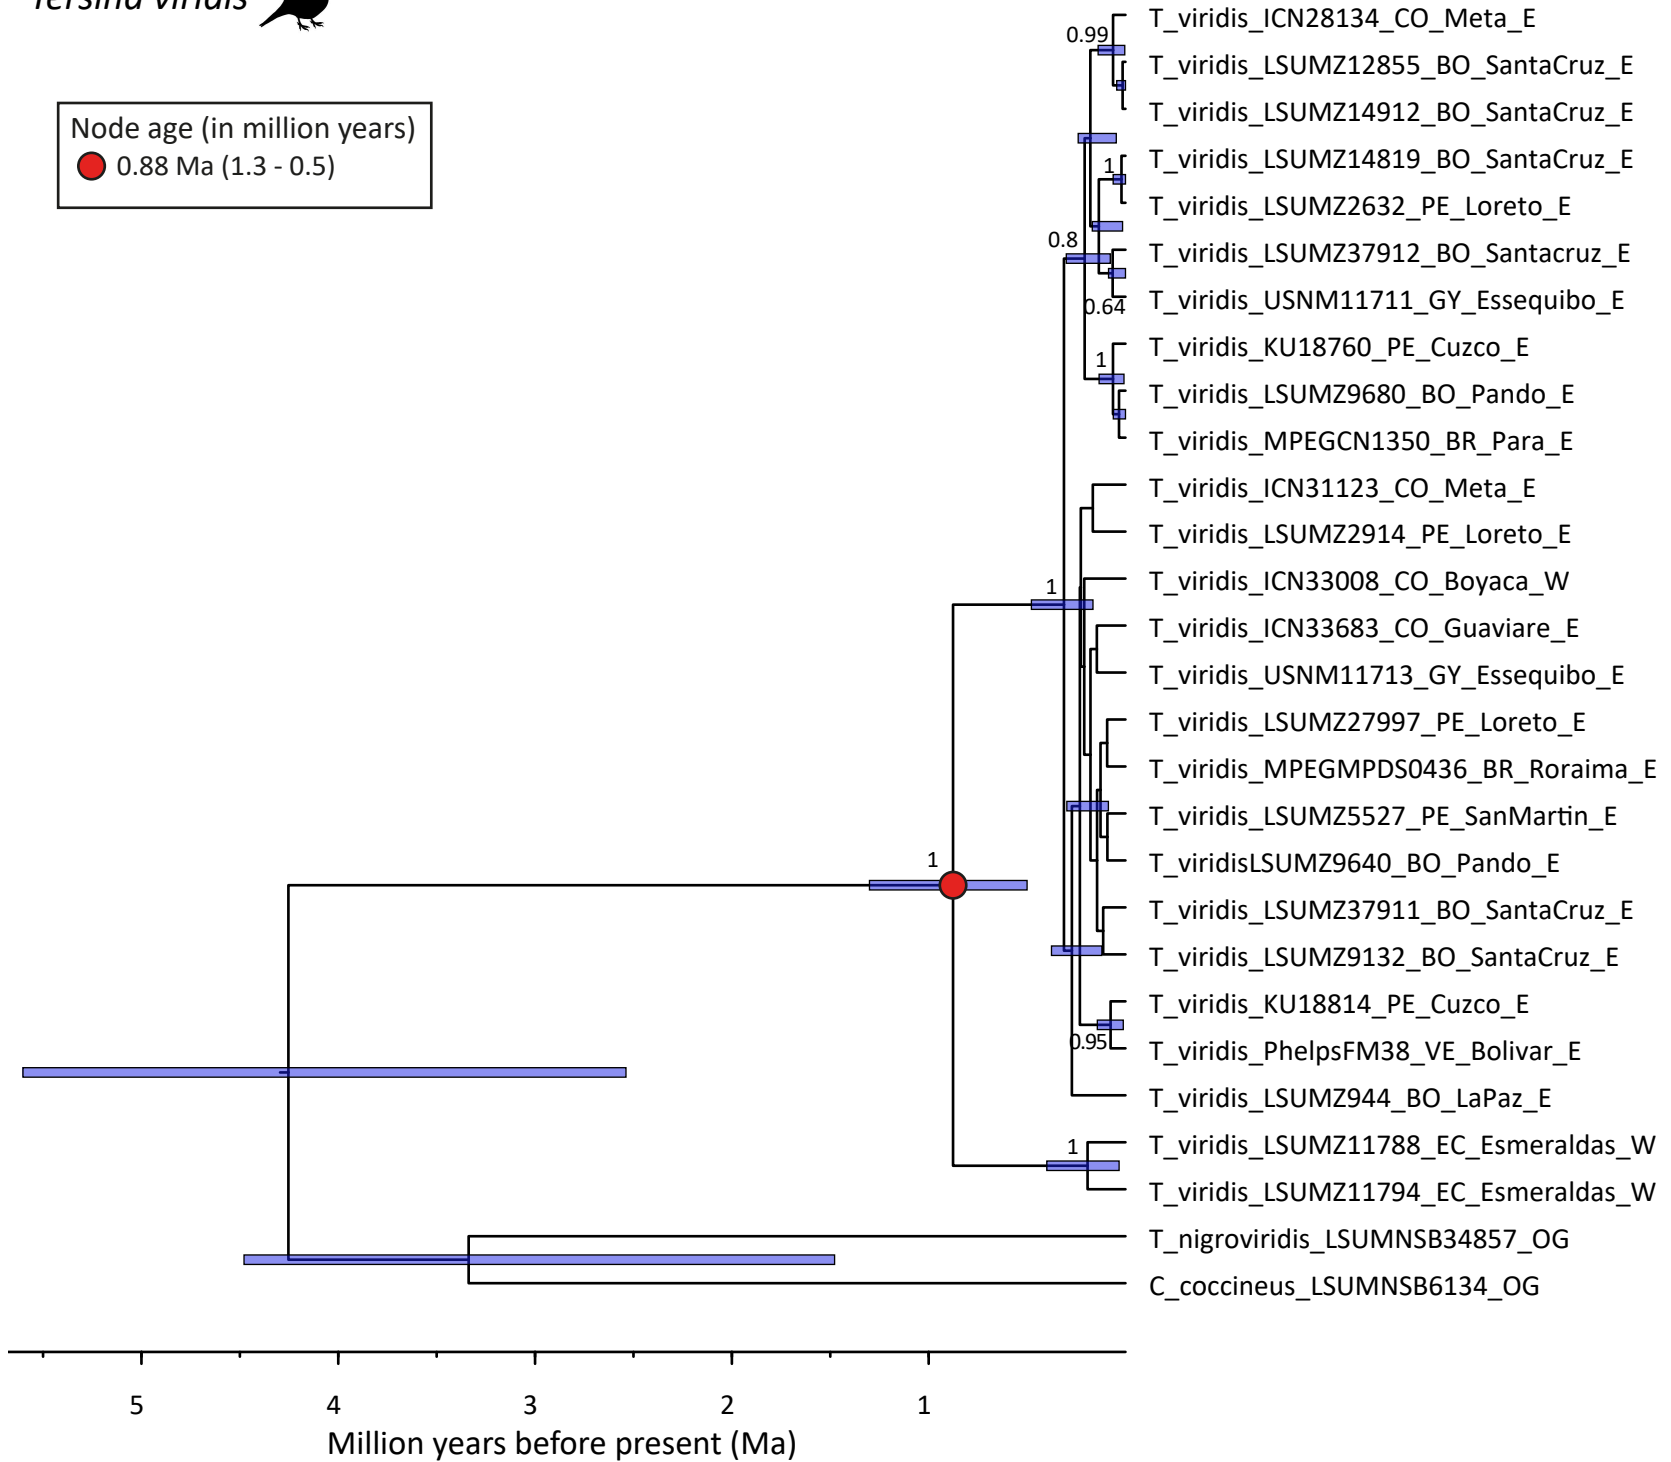

*Trogon rufus* 

Node age (in million years)  
● 5.03 Ma (6.39 - 3.72)

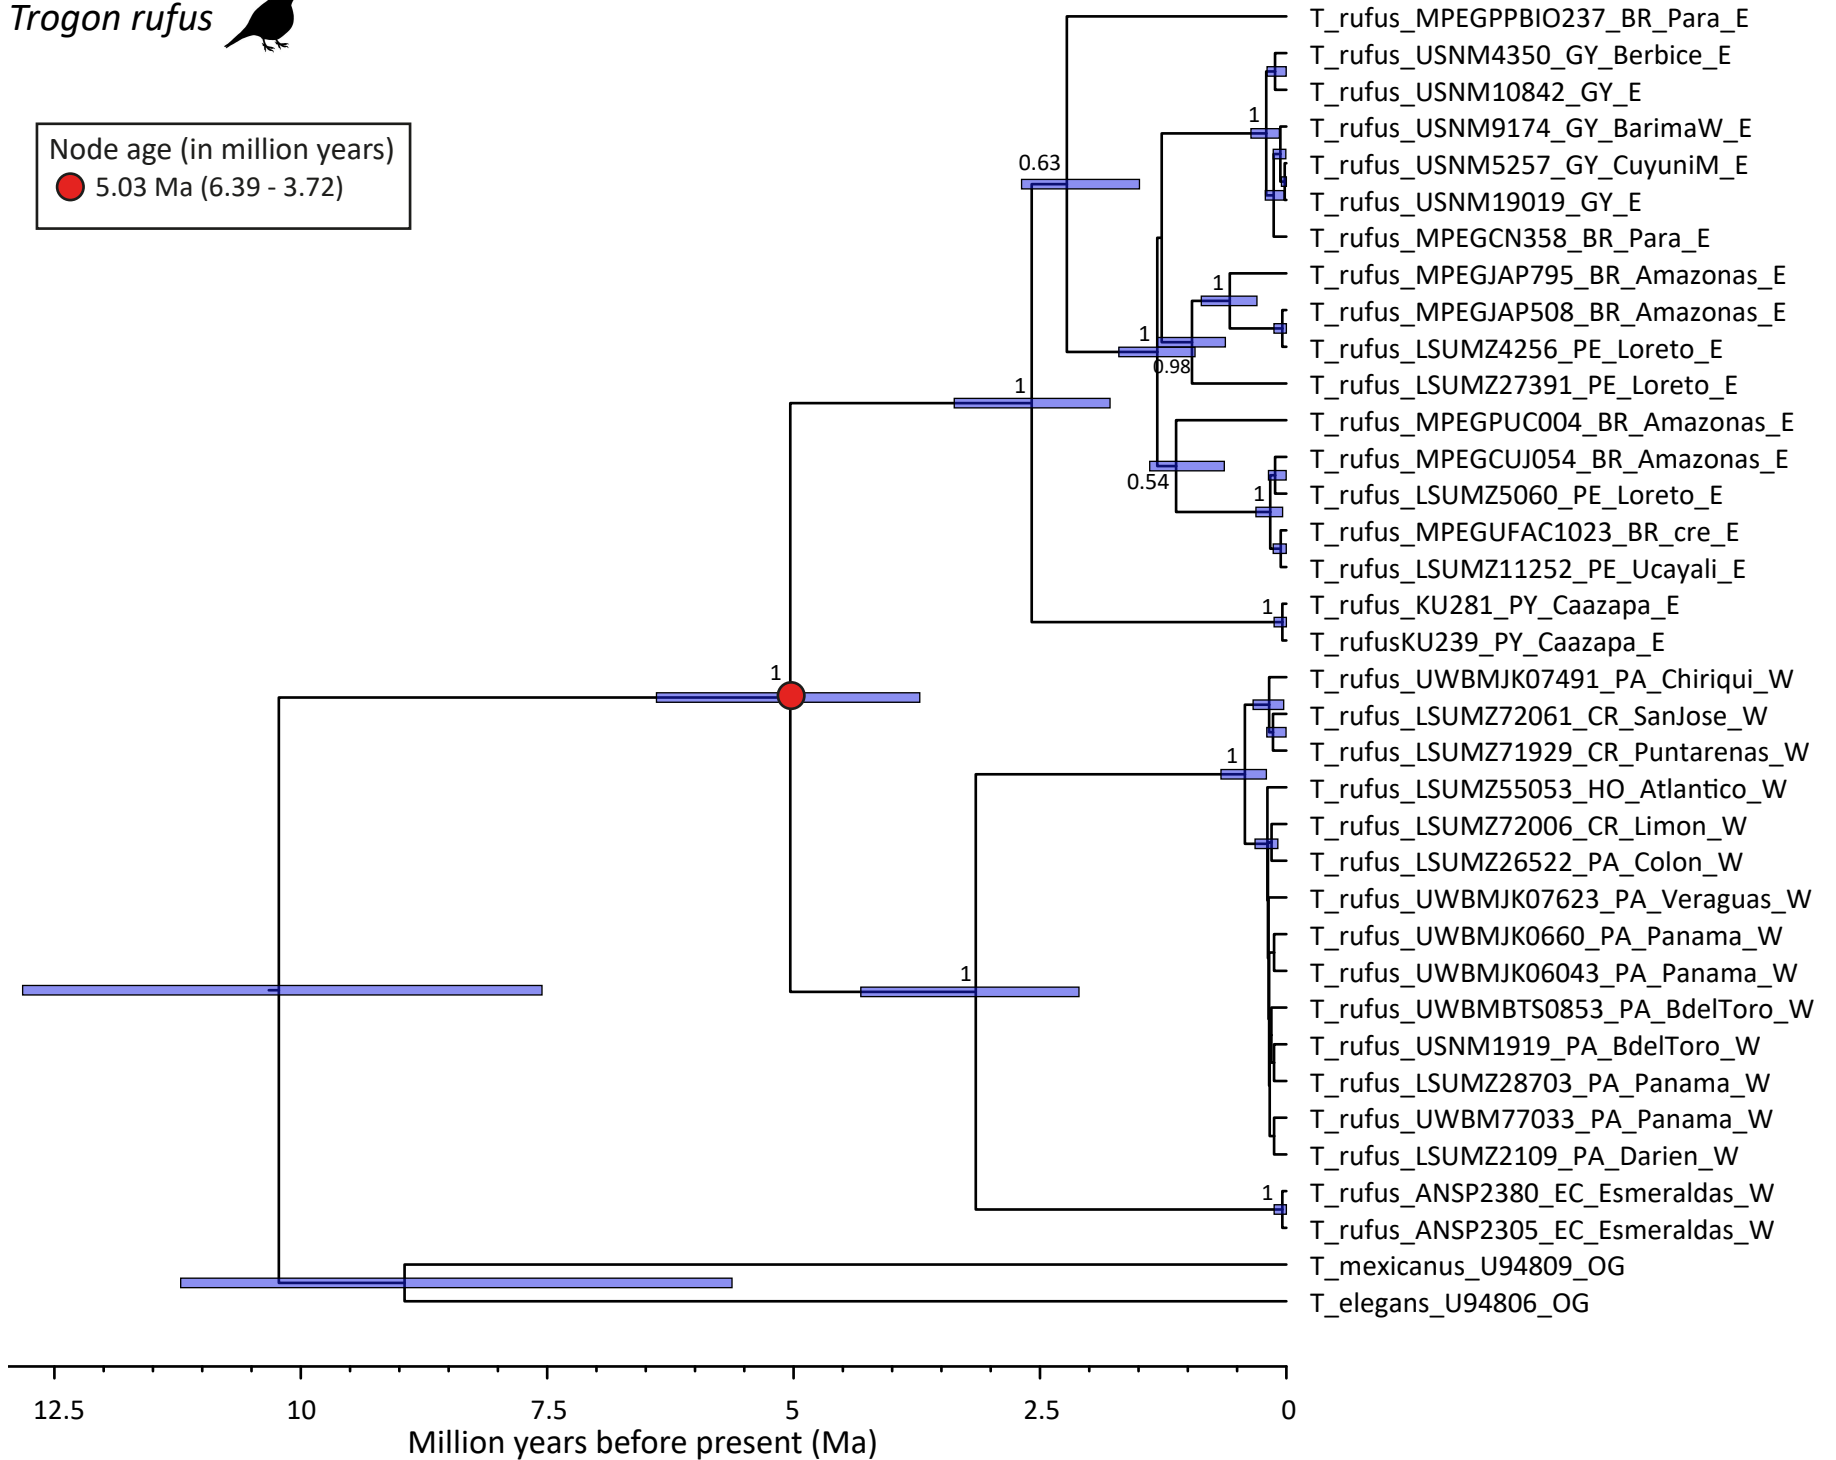

*Cebus albifrons* 

Node age (in million years)

● 0.92 Ma (1.35 - 0.54)

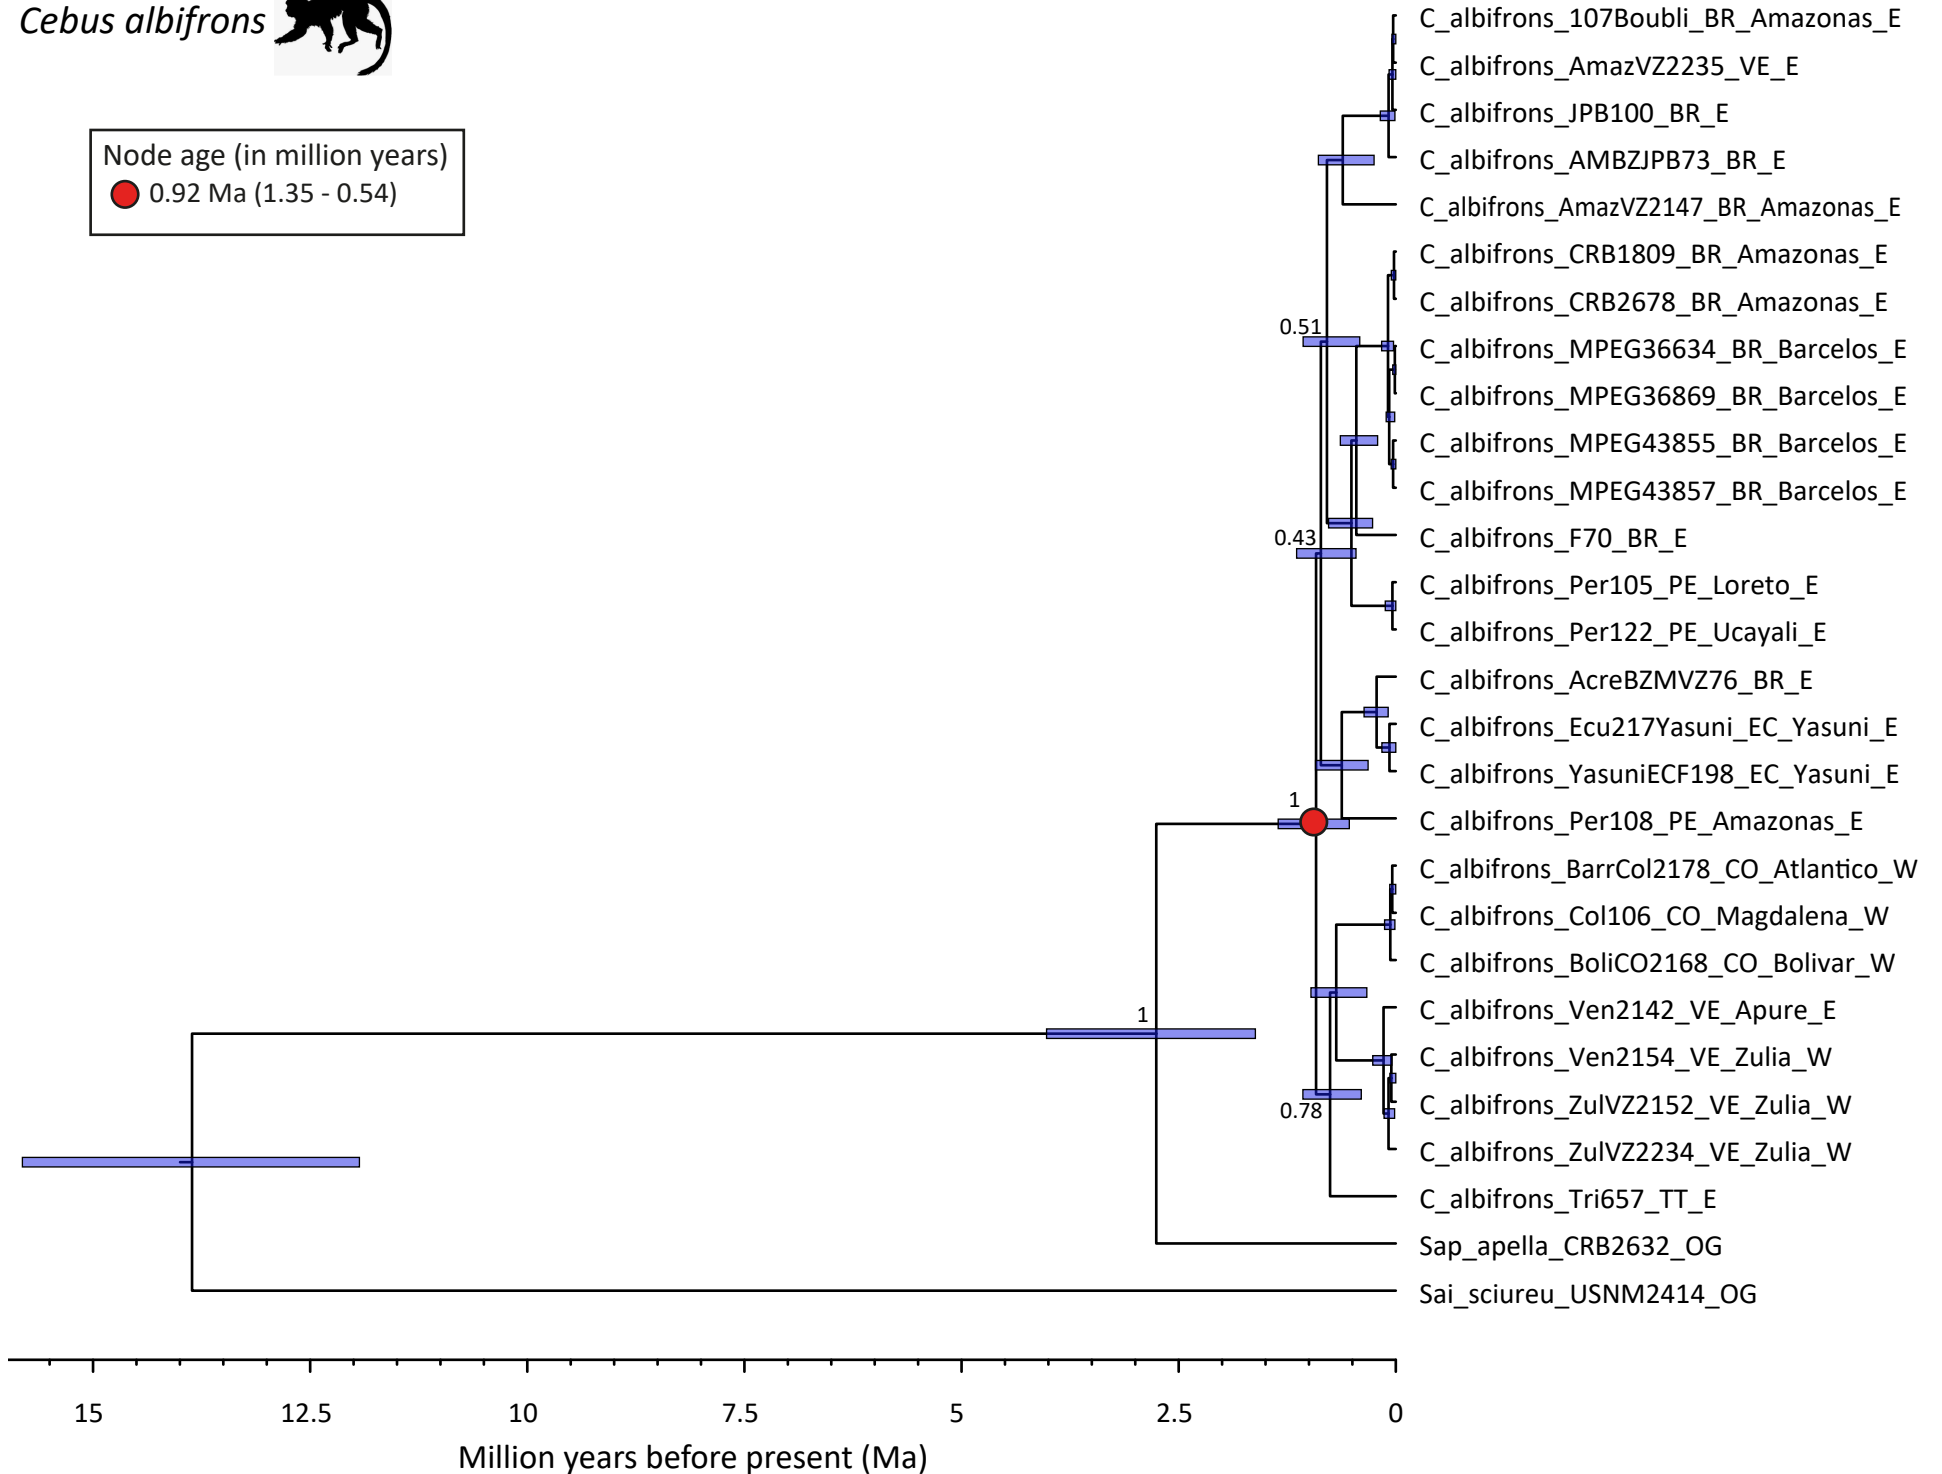



*Coendou prehensilis*

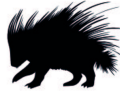

Node age (in million years)  
● 0.4 Ma (1 - 0.11)

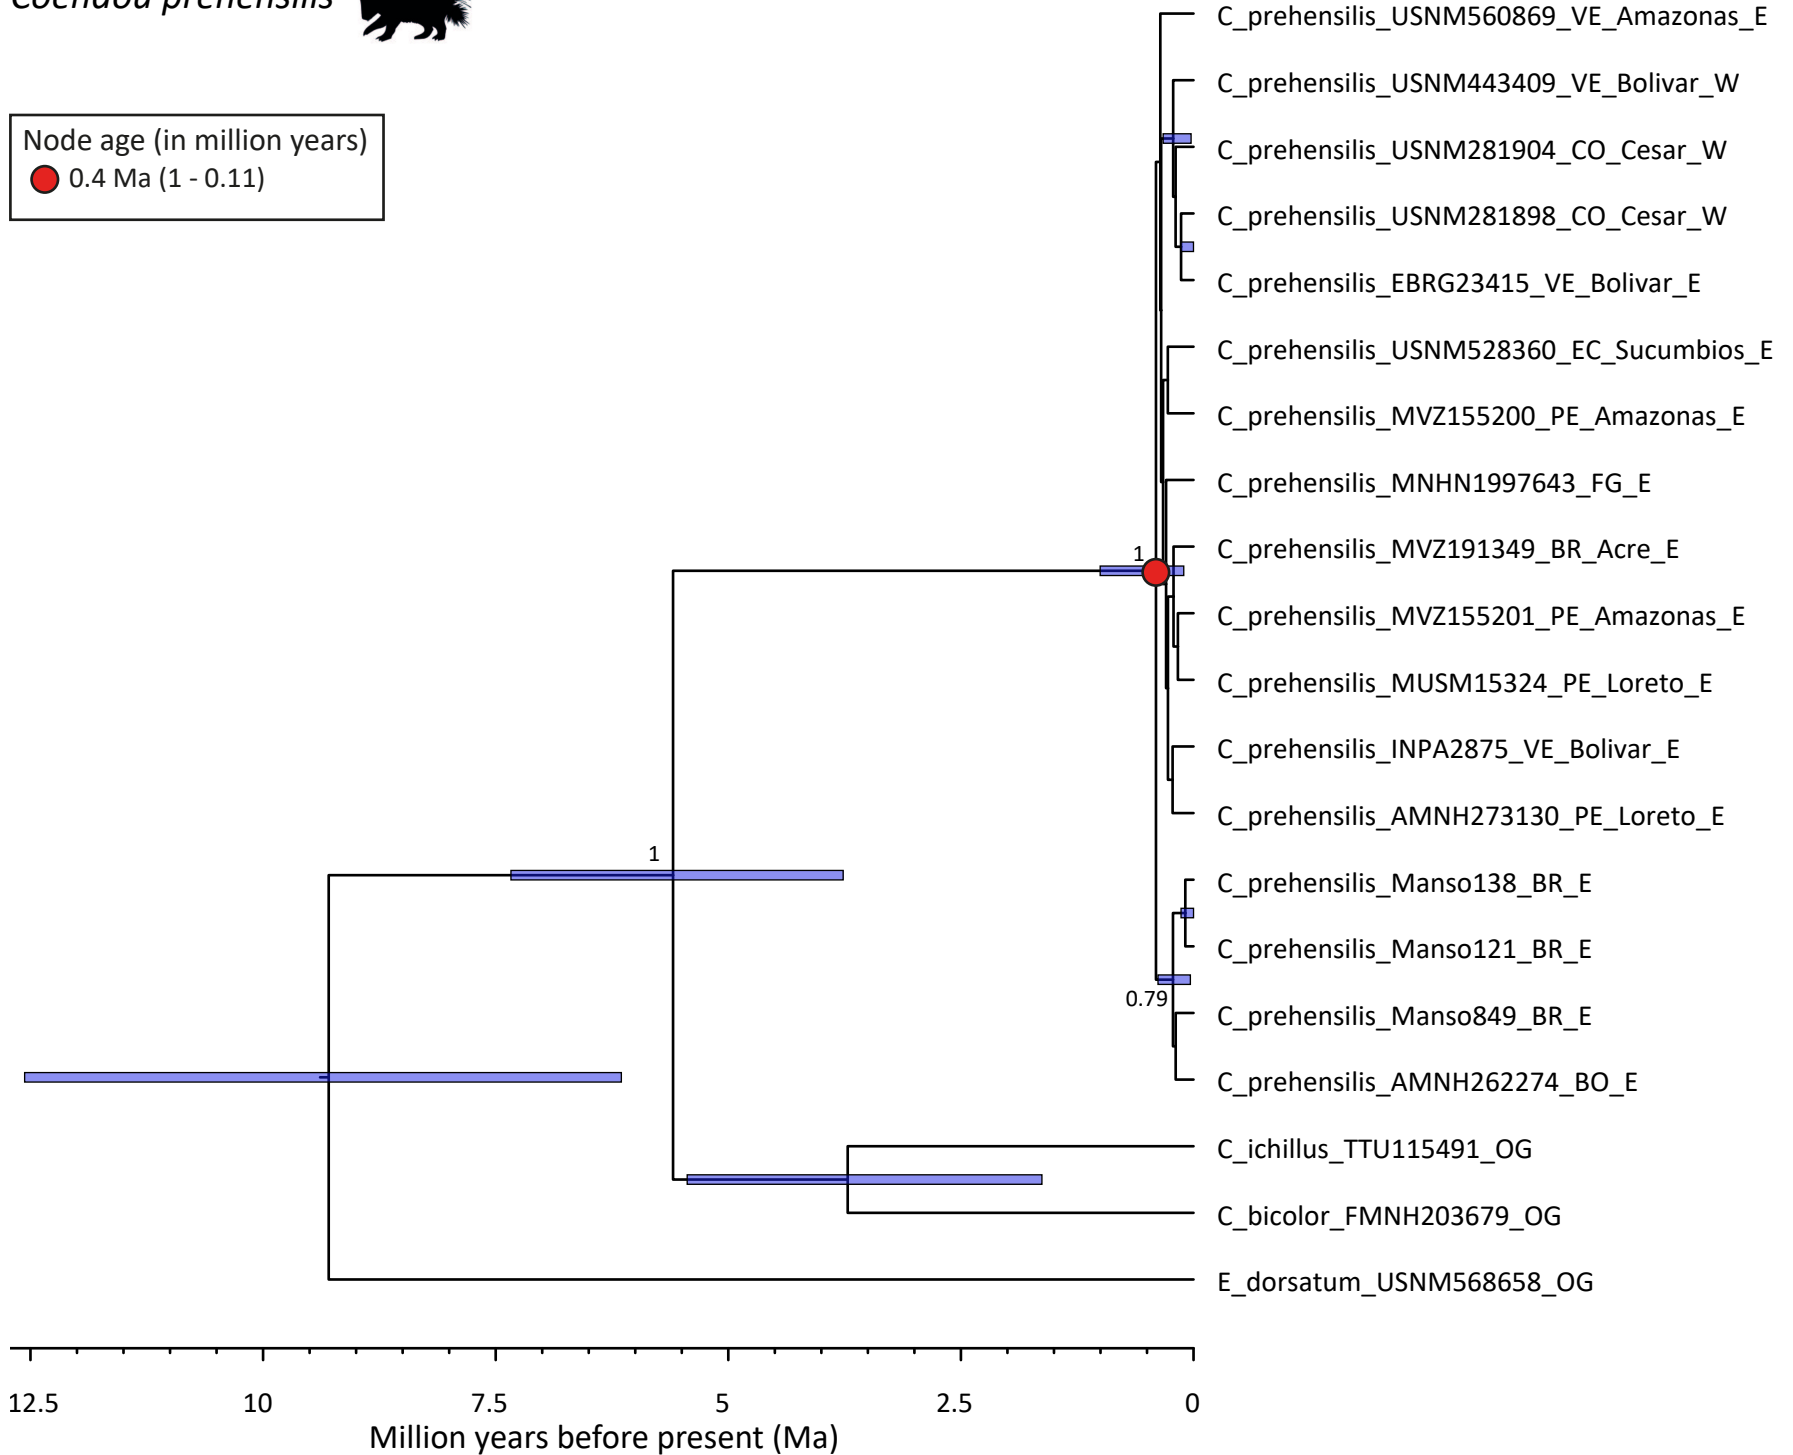



*Philander opossum* 

Node age (in million years)  
 0.67 Ma (1.48 - 0.1)

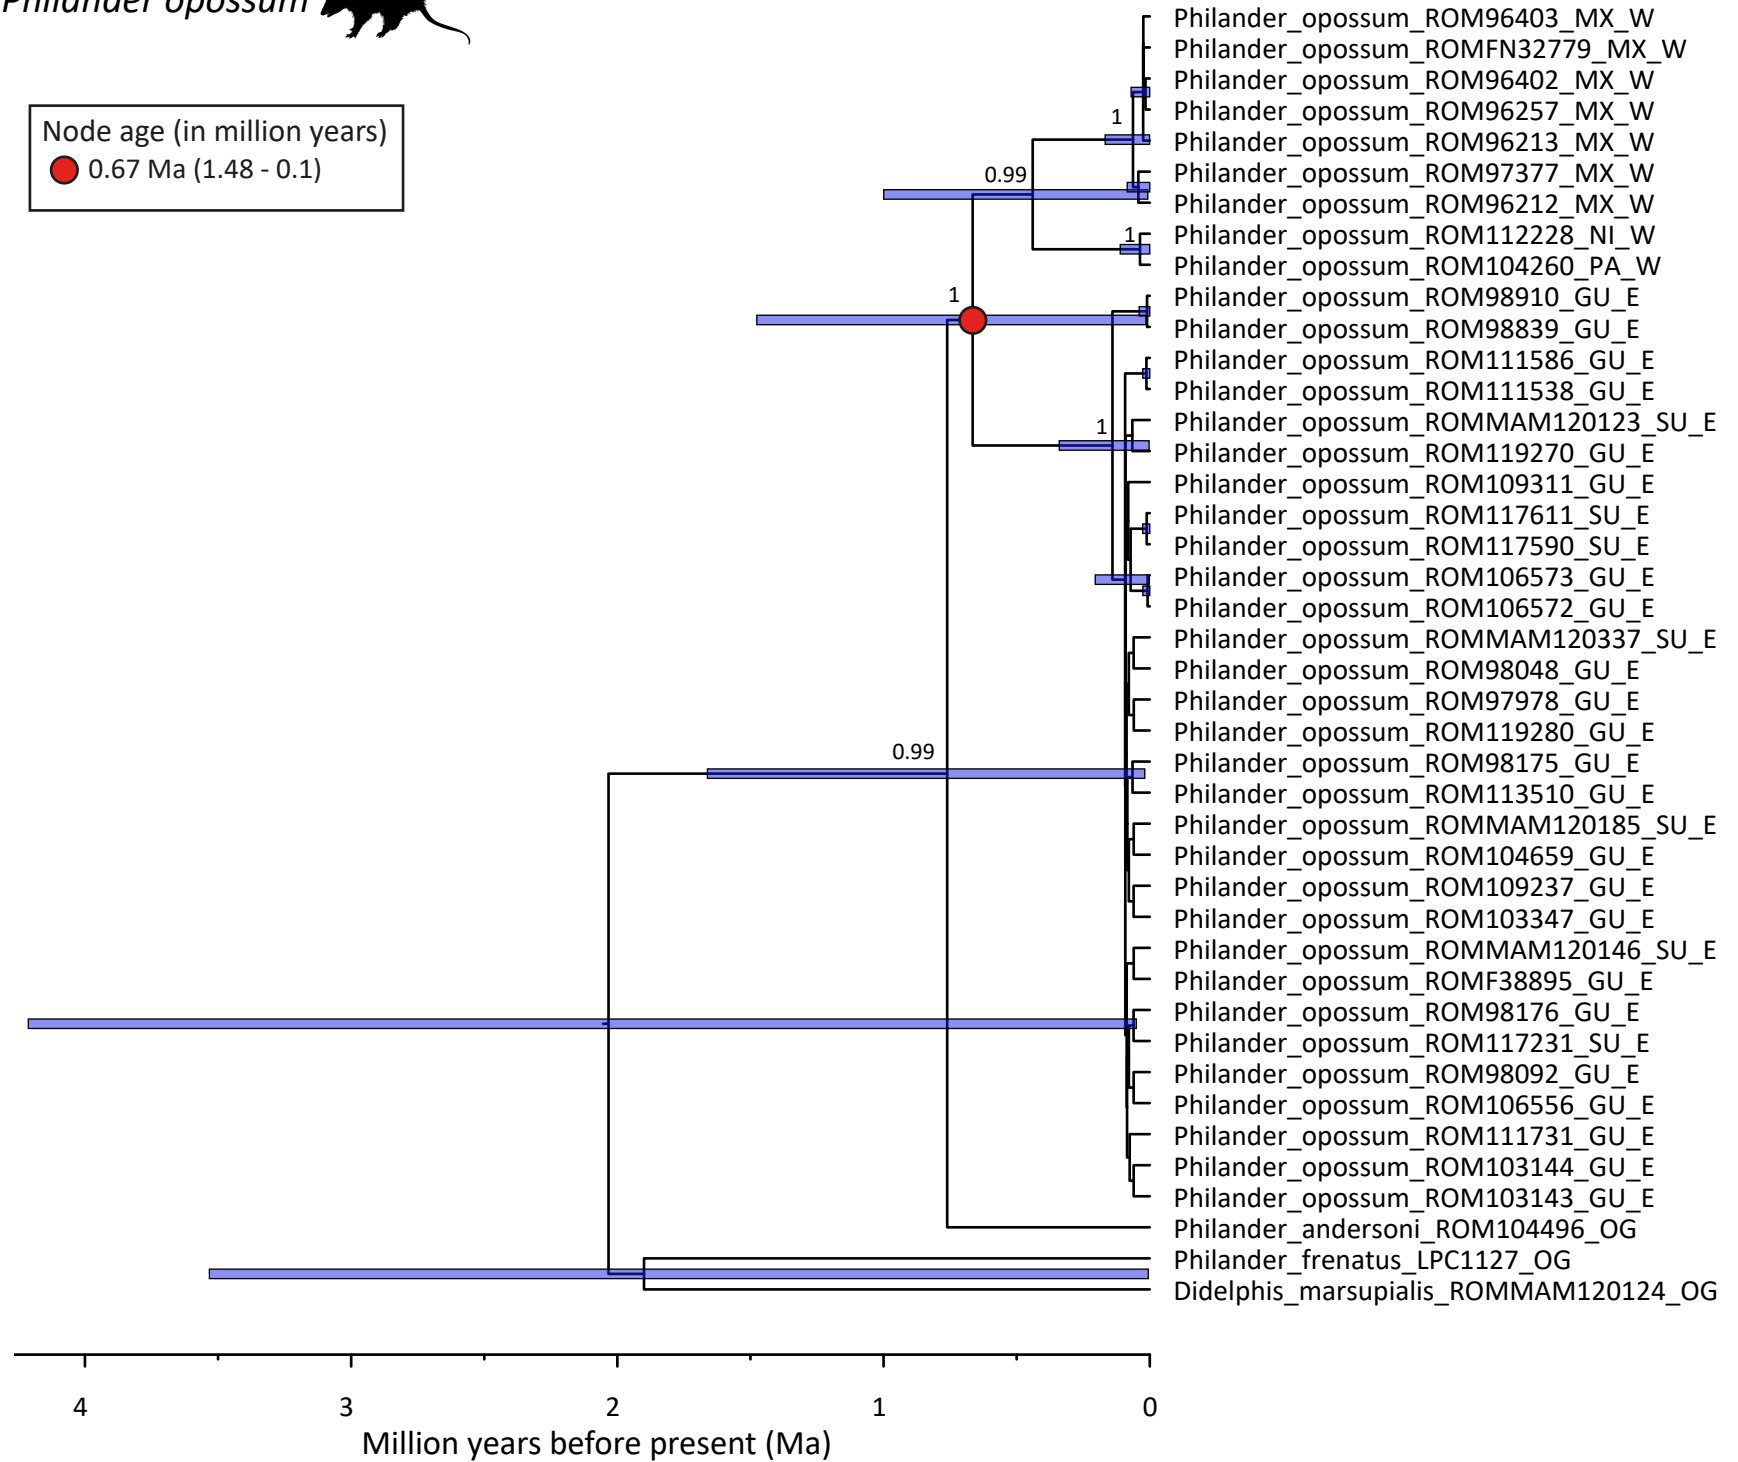

*Saimiri sciureus*, *S. oerstedii*

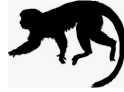

Node age (in million years)  
● 2.85 Ma (6.38 - 0.53)

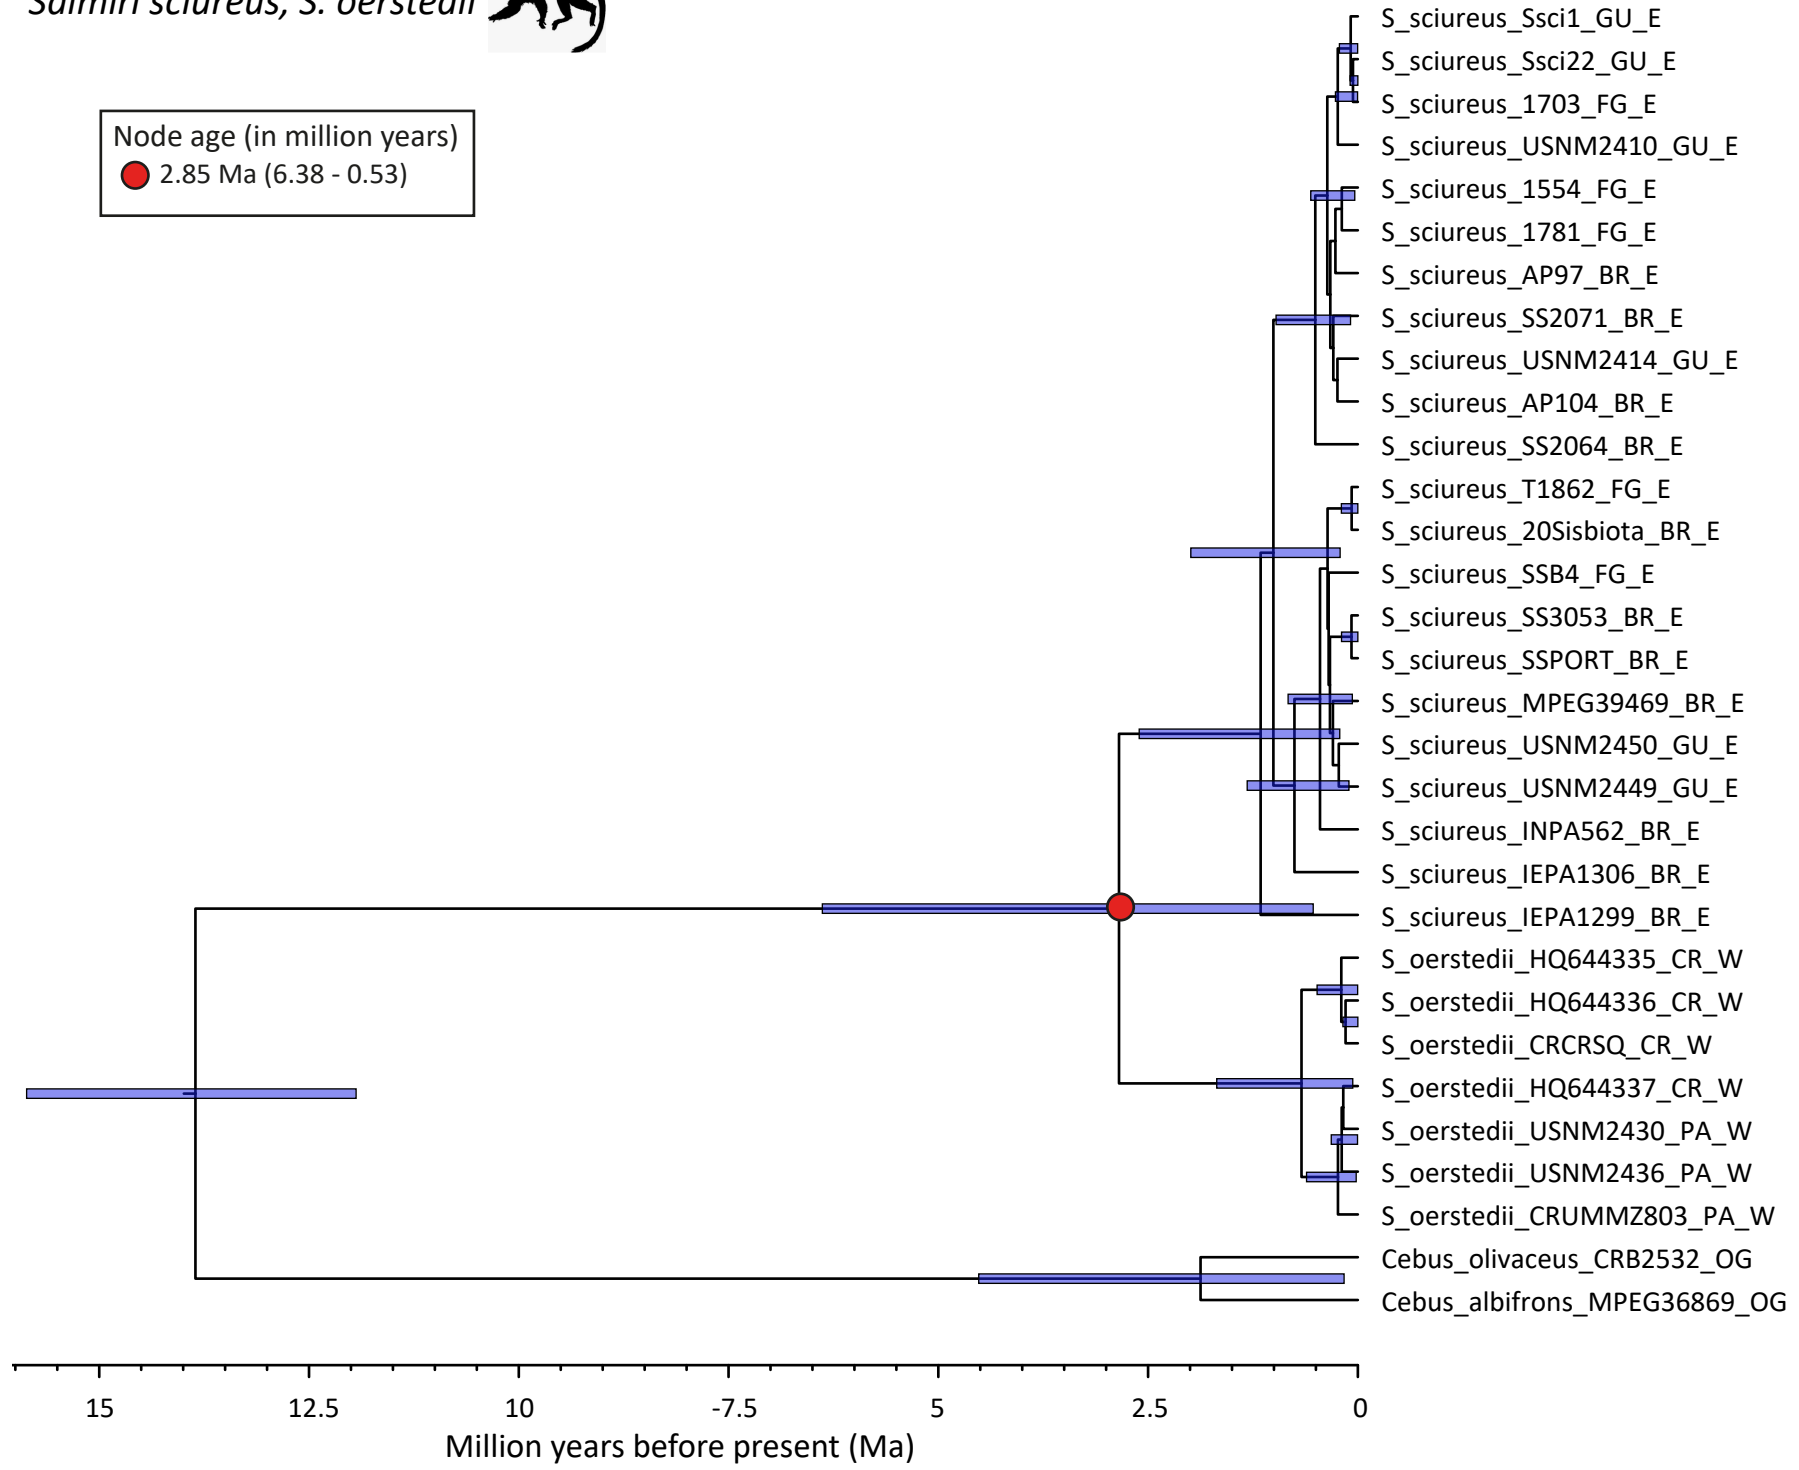

*Trachops cirrhosus*

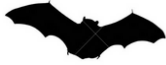

Node age (in million years)

● 2.87 Ma (5.72 - 1.16)

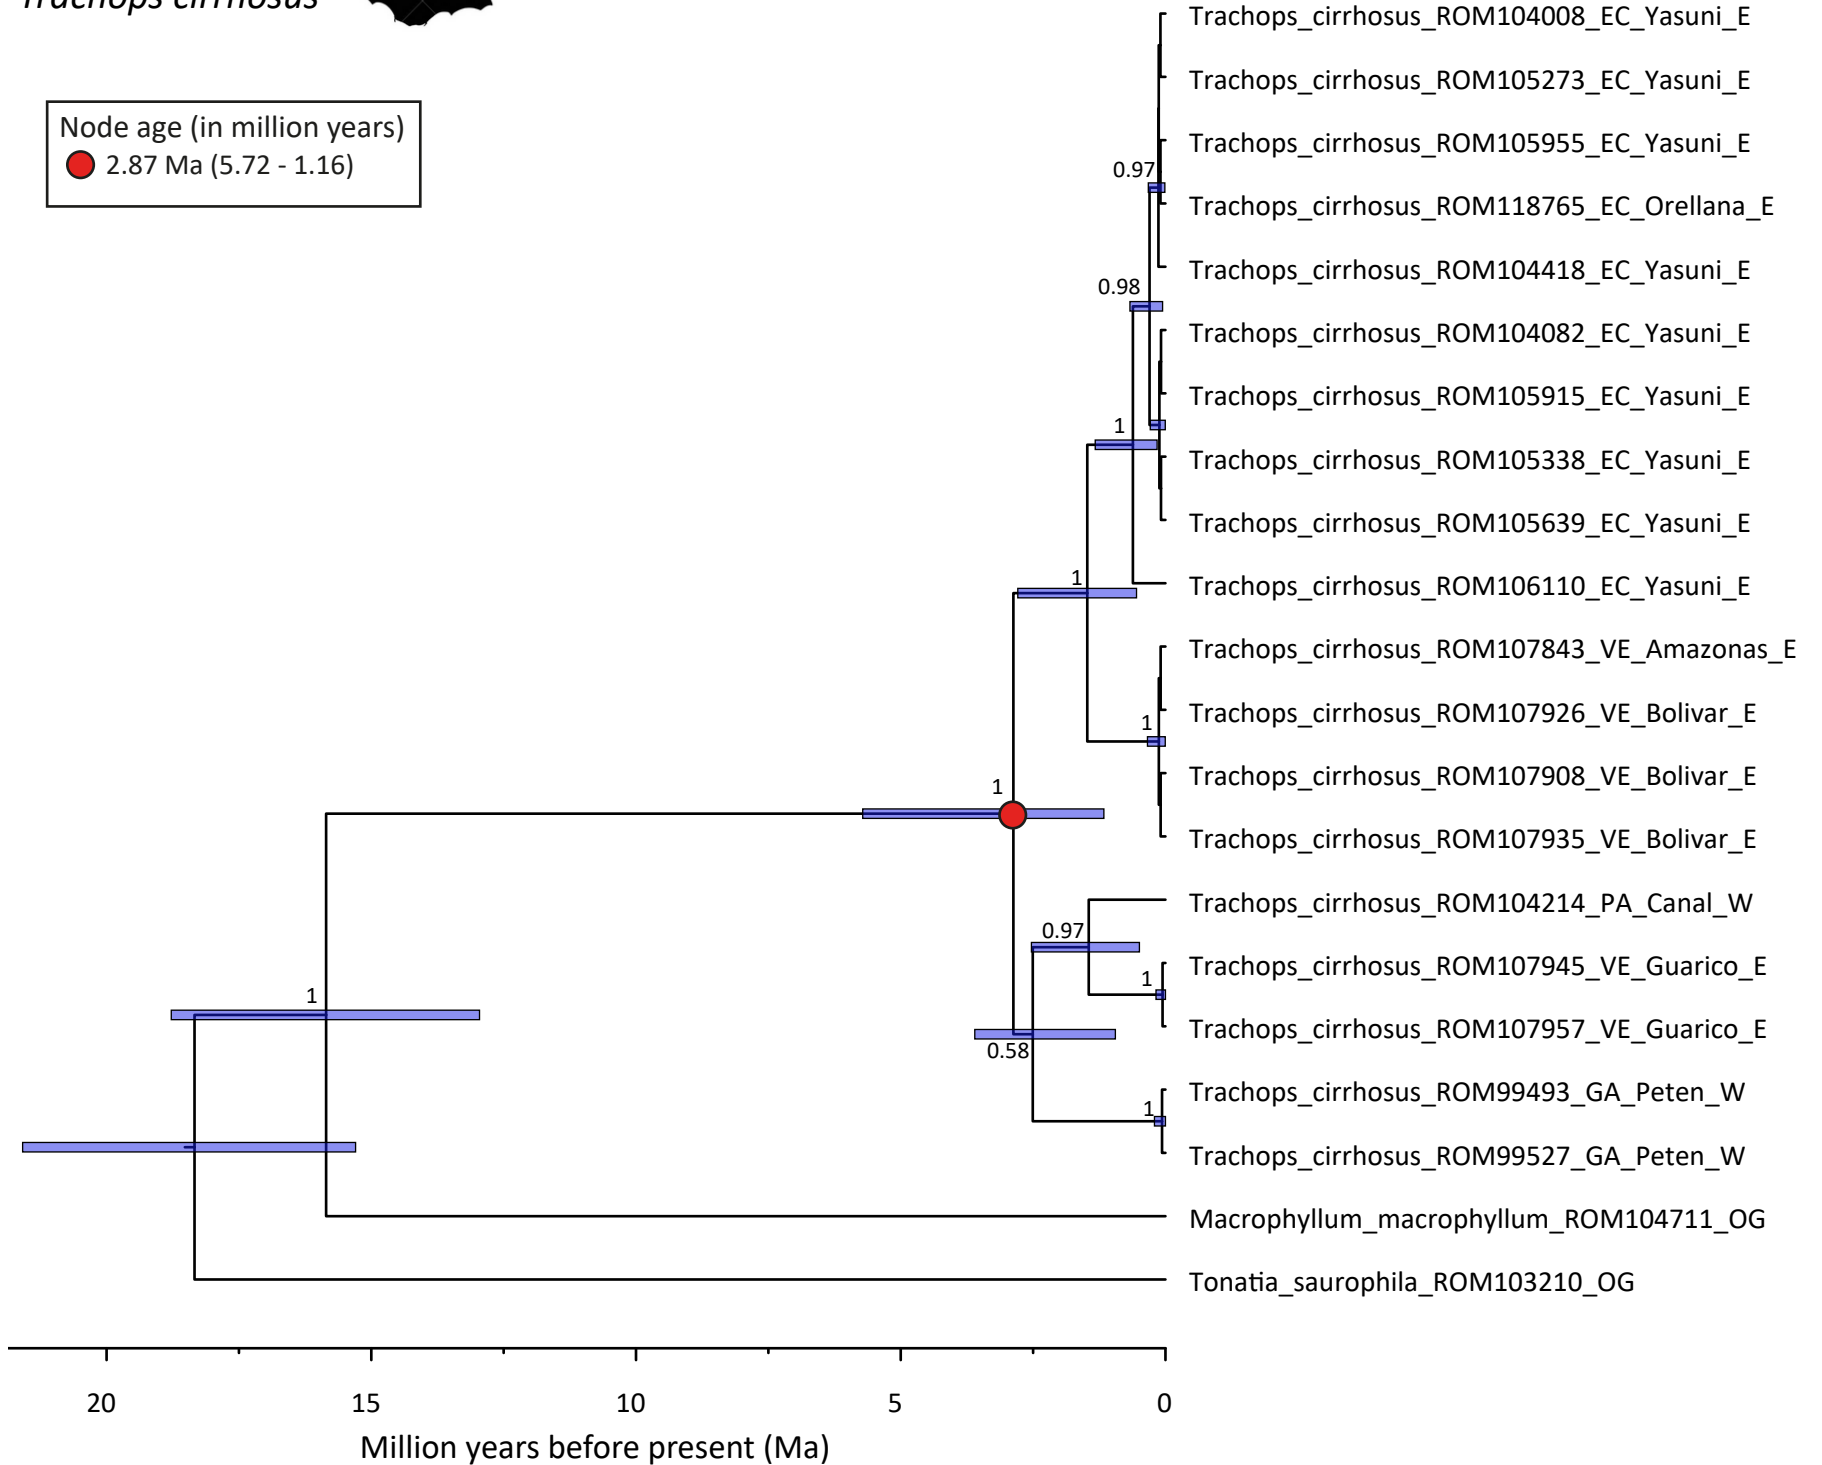

Supplement: Appendix_S2.pdf [file Appendix_S2.pdf]
