# Supplementary material for: Synthesis of geological data and comparative phylogeography of lowland tetrapods suggests recent dispersal through lowland portals crossing the Eastern Andean Cordillera
Source: PeerJ journal article supplement (doi:10.7717/peerj.13186), 2022-07-13

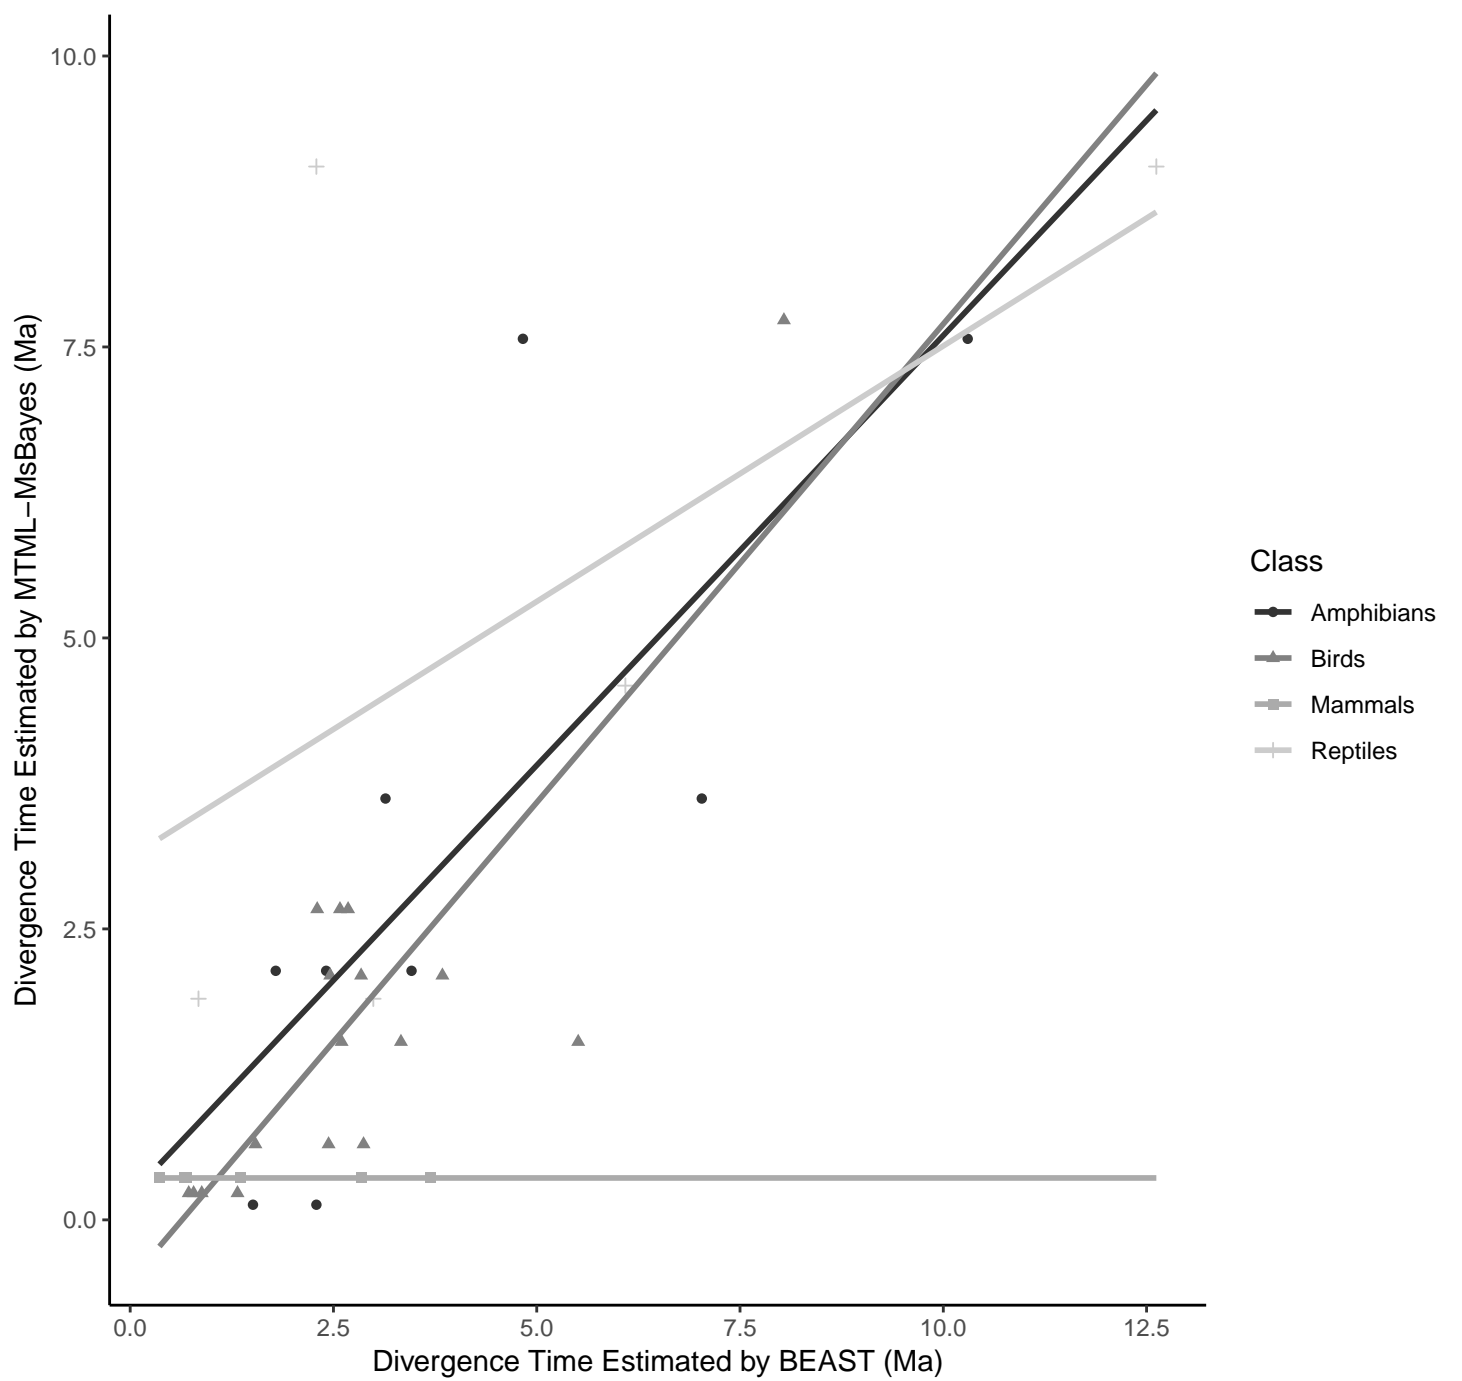

Supplement: Fig_S1.pdf [file Fig_S1.pdf]
