# Supplementary material for: Synthesis of geological data and comparative phylogeography of lowland tetrapods suggests recent dispersal through lowland portals crossing the Eastern Andean Cordillera
Source: PeerJ. 2022 Jul 13;10:e13186. doi: 10.7717/peerj.13186 (PMC9288170; doi:10.7717/peerj.13186)
Supplement: Supplemental Information 1 [file peerj-10-13186-s001.xlsx]

## Sheet: Boa
Synthesis of geological data and comparative phylogeography of lowland tetrapods suggests recent dispersal through lowland portals crossing the Eastern Andean Cordillera.
By Erika Rodríguez-Muñoz, Camilo Montes, Fernando J. M. Rojas-Runjaic, and Andrew J. Crawford.
Species	Gene	Voucher/Isolate	Country or region	Newly Generated sequence?
	Cyt b
Boa constrictor constrictor	GQ300906	BAM5	Suriname	No
Boa constrictor constrictor	GQ300897	BC1	Suriname	No
Boa constrictor constrictor	EU273655	BRA	Brazil	No
Boa constrictor constrictor	EU273653	BRA2	Brazil	No
Boa constrictor constrictor	EU273654	BRA3	Brazil: Marajó	No
Boa constrictor constrictor	EU273632	GUY1	Guyana	No
Boa constrictor constrictor	GQ300896	GUY10	Guyana	No
Boa constrictor constrictor	EU273631	GUY11	Guyana	No
Boa constrictor constrictor	EU273647	GUY12	Guyana	No
Boa constrictor constrictor	GQ300903	GUY13	Guyana	No
Boa constrictor constrictor	GQ300898	GUY14	Guyana	No
Boa constrictor constrictor	EU273661	GUY2	Guyana	No
Boa constrictor constrictor	EU273633	GUY3	Guyana	No
Boa constrictor constrictor	GQ300908	GUY4	Guyana	No
Boa constrictor constrictor	EU273639	GUY5	Guyana	No
Boa constrictor constrictor	EU273629	GUY6	Guyana	No
Boa constrictor constrictor	GQ300907	GUY7	Guyana	No
Boa constrictor constrictor	GQ300909	GUY8	Guyana	No
Boa constrictor constrictor	EU273646	GUY9	Guyana	No
Boa constrictor constrictor	EU273662	GUYA	Guyana	No
Boa constrictor constrictor	EU273623	IQU1	Peru: Iquitos	No
Boa constrictor constrictor	EU273628	IQU10	Peru: Iquitos	No
Boa constrictor constrictor	EU273627	IQU2	Peru: Iquitos	No
Boa constrictor constrictor	EU273624	IQU3	Peru: Iquitos	No
Boa constrictor constrictor	EU273626	IQU4	Peru: Iquitos	No
Boa constrictor constrictor	GQ300902	IQU5	Peru: Iquitos	No
Boa constrictor constrictor	EU273636	IQU7	Peru: Iquitos	No
Boa constrictor constrictor	EU273634	IQU8	Peru: Iquitos	No
Boa constrictor constrictor	EU273634	IQU8	Peru: Iquitos	No
Boa constrictor constrictor	EU273625	IQU9	Peru: Iquitos	No
Boa constrictor constrictor	EU273637	PER1	Eastern Peru	No
Boa constrictor constrictor	EU273638	PER2	Eastern Peru	No
Boa constrictor constrictor	GQ300901	PER3	Eastern Peru	No
Boa constrictor constrictor	EU273640	PER4	Eastern Peru	No
Boa constrictor constrictor	GQ300900	PER5	Eastern Peru	No
Boa constrictor constrictor	EU273643	PER6	Eastern Peru	No
Boa constrictor constrictor	EU273635	PERW	Peru: Tarapoto	No
Boa constrictor constrictor	GQ300905	SURI1	Suriname	No
Boa constrictor constrictor	GQ300910	SURI2	Suriname	No
Boa constrictor constrictor	GQ300904	SURI3	Suriname	No
Boa constrictor constrictor	EU273630	SURI4	Suriname	No
Boa constrictor constrictor	EU273649	SURI5	Suriname	No
Boa constrictor constrictor	EU273648	SURI6	Suriname	No
Boa constrictor constrictor	GQ300899	SURI7	Surinam	No
Boa constrictor imperator	EU273609	BCK1	Colombia: Chocó	No
Boa constrictor imperator	EU273611	BCKO	Colombia: Chocó	No
Boa constrictor imperator	BCU69746	BCU69746	Costa Rica	No
Boa constrictor imperator	GQ300887	COL1	Colombia: East-Llanos	No
Boa constrictor imperator	EU273658	COL2	Colombia: East-Llanos	No
Boa constrictor imperator	GQ300883	COL3	Colombia: East-Llanos	No
Boa constrictor imperator	GQ300884	COL4	Colombia: East-Llanos	No
Boa constrictor imperator	GQ300924	COS4	Costa Rica: Cahuita	No
Boa constrictor imperator	EU273659	ECU2	Ecuador: West	No
Boa constrictor imperator	EU273660	ECU4	Ecuador: West	No
Boa constrictor imperator	EU273614	KOS1	Costa Rica	No
Boa constrictor imperator	GQ300922	KOS2	Costa Rica	No
Boa constrictor imperator	GQ300923	KOS3	Costa Rica	No
Boa constrictor imperator	GQ300925	KOS7	Costa Rica	No
Boa constrictor imperator	GQ300885	KOST	Costa Rica	No
Boa constrictor imperator	AB177354	MVZFC-13188	Panama: Barro Colorado	No
Boa constrictor sabogae	EU273665	SAB2	Panama: Saboga Island	No
Corallus caninus	HM348893	CCNVenezuela769	Outgroup - Venezuela	No
Corallus hortulanus	HM348885	Chort6AmazonasBrasil	Outgroup - Brazil	No
Epicrates cenchria	HQ399502	Epcen3	Outgroup	No

## Sheet: Caiman
Species	Genes		Voucher/Isolate	Country: region	Newly Generated sequence?
	COI	Cyt b
Caiman crocodilus fuscus	EU260416	EU496817	CAcrfu13	Costa Rica: Río San Juan	No
Caiman crocodilus fuscus	EU260417	EU496818	CAcrfu31	Costa Rica: Río San Juan	No
Caiman crocodilus fuscus	EU260418	EU496819	CAcrfu41	Costa Rica: Río San Juan	No
Caiman crocodilus fuscus	EU260419	EU496820	CAcrfu42	Costa Rica: Río San Juan	No
Caiman crocodilus fuscus	EU260420	EU496821	CAcrfu44	Costa Rica: Río San Juan	No
Caiman crocodilus fuscus	EU260421	EU496822	CAcrfu46	El Salvador: Río Cara Sucia	No
Caiman crocodilus fuscus	EU260422	EU496823	CAcrfu47	El Salvador: Río Cara Sucia	No
Caiman crocodilus fuscus	EU260423	EU496824	CAcrfu48	El Salvador: Río Cara Sucia	No
Caiman crocodilus fuscus	EU260424	EU496825	CAcrfu49	El Salvador: San Salvador	No
Caiman crocodilus fuscus	EU260425	EU496826	CAcrfu51	El Salvador: San Salvador	No
Caiman crocodilus fuscus	EU260426	EU496827	CAcrfu53	El Salvador: San Salvador	No
Caiman crocodilus fuscus	EU260427	EU496828	CAcrfu55	El Salvador: San Salvador	No
Caiman crocodilus fuscus	EU260428	EU496829	CAcrfu59	Costa Rica: Río Parrita	No
Caiman crocodilus fuscus	EU260429	EU496830	CAcrfu62	Costa Rica: Río Parrita	No
Caiman crocodilus fuscus	EU260430	EU496831	CAcrfu66RParitaCRPAC	Costa Rica: Río Parrita	No
Caiman crocodilus fuscus	EU260431	EU496832	CAcrfu69	Costa Rica: Río Parrita	No
Caiman crocodilus fuscus	EU260432	EU496833	CAcrfu70	Panama: Río Armila	No
Caiman crocodilus fuscus	EU260433	EU496834	CAcrfu72	Panama: Rio Armila	No
Caiman crocodilus fuscus	EU260434	EU496835	CAcrfu74	Panama: Río Armila	No
Caiman crocodilus fuscus	EU260435	EU496836	CAcrfu79RMagdalenaCOATL	Colombia: Río Magdalena	No
Caiman crocodilus fuscus	EU260436	EU496837	CAcrfu83RTuiraPAPAC	Panama: Río Tuira	No
Caiman crocodilus fuscus	EU260437	EU496838	CAcrfu85RSan San PAATL	Panama: Río San San	No
Caiman crocodilus fuscus	EU260438	EU496839	CAcrfu86RSan San PAATL	Panama: Río San San	No
Caiman crocodilus fuscus	EU260439	EU496840	CAcrfu90RBalsaPAPAC	Panama: Río Balsa	No
Caiman crocodilus fuscus	EU260440	EU496841	CAcrfu95RLaMaestraPAPAC	Panama: Río La Maestra	No
Caiman crocodilus fuscus	EU260441	EU496842	CAcrfu106SJuanPAPAC	Panama: Río San Junan	No
Caiman crocodilus fuscus	EU260442	EU496843	CAcrfu108CulebraPAATL	Panama: Canal de Panamá	No
Caiman crocodilus fuscus	EU260443	EU496844	CAcrfu109CulebraPAATL	Panama: Canal de Panamá	No
Caiman crocodilus chiapasius	EU260444	EU496845	CAcrch120TapachulaMXATL	Mexico: Tapachula	No
Caiman crocodilus chiapasius	EU260445	EU496846	CAcrch122TapachulaMXATL	Mexico: Tapachula	No
Caiman crocodilus chiapasius	EU260446	EU496847	CAcrch123TapachulaMXATL	Mexico: Tapachula	No
Caiman crocodilus fuscus	EU260447	EU496848	CAcrfu139RChagresPAATL	Panama: Río Chagres	No
Caiman crocodilus fuscus	EU260448	EU496849	CAcrfu141RSJuanPAPAC	Panama: Río San Juan	No
Caiman crocodilus fuscus	EU260449	EU496850	CAcrfu142RSJuanPAPAC	Panama: Río San Juan	No
Caiman crocodilus crocodilus	EU260450	EU496851	CAcrcr178AmazonasPEATL	Peru: Río Istocohca	No
Caiman crocodilus crocodilus	EU260451	EU496852	CAcrcr179AmazonasPEATL	Peru: Río Istocohca	No
Caiman crocodilus crocodilus	EU260452	EU496853	CAcrcr251RUcayaliPEATL	Peru: Río Ucayali	No
Caiman crocodiluscrocodilus	EU260453	EU496854	CAcrcr255RUcayaliPEATL	Peru: Río Ucayali	No
Caiman crocodilus crocodilus	EU260454	EU496855	CAcrcr260RUcayaliPEATL	Peru: Río Ucayali	No
Caiman crocodilus crocodilus	EU260455	EU496856	CAcrcr265RUcayaliPEATL	Peru: Río Ucayali	No
Caiman crocodilus crocodilus	EU260456	EU496857	CAcrcr279RIstocohcaPEATL	Peru: Río Amazonas	No
Caiman crocodilus crocodilus	EU260457	EU496858	CAcrcr281RIstocohcaPEATL	Peru: Río Istocohca	No
Caiman crocodilus crocodilus	EU260458	EU496859	CAcrcr282RIstocohcaPEATL	Peru: Río Istocohca	No
Caiman crocodilus crocodilus	EU260459	EU496860	CAcrcr283RIstocohcaPEATL	Peru: Río Istocohca	No
Caiman crocodilus crocodilus	EU260460	EU496861	CAcrcr284RIstocohcaPEATL	Peru: Río Istocohca	No
Paleosuchus trigonatus	EU260461	EU496862	PAtr169RUcayaliPEATL	Outgroup	No
Alligator mississippiensis	EU260462	EU496863	ALmi111USA	Outgroup	No

## Sheet: Chelonoidis
Species	Gene	Voucher/Isolate	Country: region	Newly Generated sequence?
	Cyt b
Chelonoidis carbonarius	EF490386	CcH01	Brazil: Para	No
Chelonoidis carbonarius	EF490387	CcH02	Brazil: Para	No
Chelonoidis carbonarius	EF490388	CcH03	Brazil: Para	No
Chelonoidis carbonarius	EF490389	CcH04	Brazil: Para	No
Chelonoidis carbonarius	EF490390	CcH05	Brazil: Para	No
Chelonoidis carbonarius	EF490391	CcH06	Brazil: Para	No
Chelonoidis carbonarius	EF490392	CcH07	Brazil: Para	No
Chelonoidis carbonarius	EF490393	CcH08	Brazil: Para	No
Chelonoidis carbonarius	EF490394	CcH09	Brazil: Para	No
Chelonoidis carbonarius	EF490395	CcH10	Brazil: Para	No
Chelonoidis carbonarius	FM165591	COLCHI94	Colombia: Cesar: Chimichagua	No
Chelonoidis carbonarius	FM165592	COLCHI93	Colombia: Cesar: Chimichagua	No
Chelonoidis carbonarius	FM165593	COLVAL105	Colombia: Cesar: Valledupar	No
Chelonoidis carbonarius	FM165594	COLVAL107	Colombia: Cesar: Valledupar	No
Chelonoidis carbonarius	FM165595	COLVAL108	Colombia: Cesar: Valledupar	No
Chelonoidis carbonarius	FM165596	COLVAL110	Colombia: Cesar: Valledupar	No
Chelonoidis carbonarius	FM165597	COLVAL113	Colombia: Cesar: Valledupar	No
Chelonoidis carbonarius	FM165598	FGNL958	French Guiana	No
Chelonoidis carbonarius	FM165599	FGINC5135	French Guiana: Iracoubo	No
Chelonoidis carbonarius	FM165600	FGNL417	French Guiana	No
Chelonoidis carbonarius	FN185746	MTD4792	Colombia: Bolívar: Tolú	No
Chelonoidis carbonarius	FN185747	MTD4791	Colombia: Bolívar: Tolú	No
Chelonoidis carbonarius	FN185748	MTD4793	Northern Colombia	No
Chelonoidis carbonarius	FN185749	MTD4794	Northern Colombia	No
Chelonoidis carbonarius	FN185750	MTD4795	Colombia: Meta: Eastern Llanos	No
Chelonoidis carbonarius	FN185751	MTD4796	Colombia: Meta: Eastern Llanos	No
Chelonoidis carbonarius	FN185752	MTD4797	Colombia: Meta: Eastern Llanos	No
Chelonoidis carbonarius	FN185753	MTD4798	Colombia: Meta: Eastern Llanos	No
Chelonoidis carbonarius	FN185754	MTD4799	Colombia: Meta: Eastern Llanos	No
Chelonoidis carbonarius	FN185755	MTD4800	Colombia: Meta: Eastern Llanos	No
Chelonoidis chilensis	DQ497297	DQ497297	Outgroup	No
Chelonoidis nigra	DQ497300	DQ497300	Outgroup	No

## Sheet: Crotalus
Species	Genes			Voucher/Isolate	Country: region	Newly Generated sequence?
	Cyt b	ND4	ND2
Crotalus durissus durissus	AY704831	AY704881	AY704786	1	Mexico: Veracruz	No
Crotalus durissus durissus	AY704832	AY704882	–	CDD	Mexico: Veracruz	No
Crotalus durissus durissus	AY704833	AY704883	AY704787	2065	Mexico: Chiapas	No
Crotalus durissus durissus	AY704834	AY704884	AY704788	2067	Mexico: Chiapas	No
Crotalus durissus durissus	AY704803	AY704853	AY704789	Sal1	El Salvador: San Salvador	No
Crotalus durissus durissus	AY704835	AY704885	AY704790	1097	Costa Rica: Puntarenas	No
Crotalus durissus cumanensis	AY704820	AY704870	AY704778	781	Venezuela: Falcon, Distrito Colina	No
Crotalus durissus cumanensis	AY704821	AY704871	AY704779	788	Venezuela: Falcon, Curimagua	No
Crotalus durissus cumanensis	AY704822	AY704872	AY704780	789	Venezuela: Falcon, Las Ventosas	No
Crotalus durissus cumanensis	AY704823	AY704873	AY704781	790	Venezuela: Falcon, Las Ventosas	No
Crotalus durissus cumanensis	AY704825	AY704875	AY704783	775	Venezuela: Distrito Federal, La Guaira	No
Crotalus durissus durissus	AY704826	AY704876	AY704784	833	Guyana	No
Crotalus durissus ruruima	AY196656	AY255083	–	1092	Brazil: Roraima	No
Crotalus durissus terrificus	AY704813	AY704863	AY704769	IB4610	Brazil: Mato Grosso	No
Crotalus durissus terrificus	AY704816	AY704866	–	IB56419	Brazil: Maranão	No
Crotalus durissus terrificus	AY704817	AY704867	AY704773	IB 56420	Brazil: Maranão	No
Crotalus durissus terrificus	AY704818	AY704868	AY704774	IB 56421	Brazil: Maranão	No
Crotalus durissus terrificus	AY704819	AY704869	AY704775	IB 4112	Brazil: Pernambuco	No
Crotalus durissus terrificus	AY704811	AY704861	AY704767	IB58460	Brazil: Mato Grosso	No
Crotalus durissus terrificus	AY704812	AY704862	AY704768	IB58466	Brazil: Mato Grosso	No
Crotalus durissus terrificus	AY704814	AY704864	AY704770	IB4826	Brazil: Mato Grosso	No
Crotalus durissus terrificus	AY704815	AY704865	AY704771	IB4826-Isolate 318	Brazil: Brasilia	No
Crotalus durissus terrificus	AY704804	AY704854	AY704772	IB4872	Brazil: Bahia	No
Crotalus durissus terrificus	–	–	AY704776	IB4127	Brazil: Bahia	No
Crotalus durissus terrificus	AY196652	AY196631	–	Unknown	Brazil: São Paulo	No
Crotalus durissus terrificus	AY196651	AY196630	–	Unknown	Brazil: São Paulo	No
Crotalus durissus terrificus	AY196650	AY196629	–	Unknown	Brazil: São Paulo	No
Crotalus durissus terrificus	AY196645	AY196621	–	Unknown	Brazil: Parana	No
Crotalus durissus terrificus	AY196644	AY196620	–	Unknown	Brazil: Parana	No
Crotalus durissus terrificus	AY704809	AY704859	AY704765	907	Brazil: Parana	No
Crotalus durissus terrificus	AY704810	AY704860	AY704766	908	Brazil: Parana	No
Crotalus durissus terrificus	AY704801	AY704851	–	IB55553	Brazil: São Paulo	No
Crotalus durissus terrificus	AY196647	AY196624	–	Unknown	Brazil: São Paulo	No
Crotalus durissus terrificus	AY196646	AY196623	–	Unknown	Brazil: São Paulo	No
Crotalus durissus terrificus	AY196642	AY196615	–	Unknown	Brazil: Minas Gerais	No
Crotalus durissus terrificus	AY196641	AY196614	–	Unknown	Brazil: Minas Gerais	No
Crotalus durissus terrificus	AY196640	AY196613	–	Unknown	Brazil: Minas Gerais	No
Crotalus durissus terrificus	AY196648	AY196626	–	Unknown	Brazil: São Paulo	No
Crotalus durissus terrificus	AY196649	AY196628	–	Unknown	Brazil: São Paulo	No
Crotalus durissus terrificus	AY704802	AY704852	–	IB55600	Brazil: São Paulo	No
Crotalus durissus terrificus	AY704801	AY704851	AY704762	IB55601	Brazil: São Paulo	No
Crotalus durissus terrificus	AY704808	AY704858	–	IB55522	Brazil: São Paulo	No
Crotalus durissus terrificus	AY704800	AY704850	AY704764	IB 55552	Brazil: São Paulo	No
Crotalus durissus terrificus	AY704807	AY704857	AY704763	IB555521	Brazil: São Paulo	No
Crotalus durissus terrificus	AY196655	AY196634	–	Unknown	Brazil: São Paulo	No
Crotalus durissus terrificus	AY196654	AY196633	–	Unknown	Brazil: São Paulo	No
Crotalus durissus terrificus	AY196653	AY196632	–	Unknown	Brazil: São Paulo	No
Crotalus durissus terrificus	AY196639	AY196612	–	Unknown	Brazil: Parana	No
Crotalus durissus terrificus	AY196638	AY196611	–	Unknown	Brazil: Parana	No
Crotalus durissus terrificus	AY196637	AY196610	–	Unknown	Brazil: Parana	No
Crotalus durissus terrificus	AY196636	AY196609	–	Unknown	Brazil: Parana	No
Crotalus durissus terrificus	AY196635	AY196618	–	Unknown	Brazil: Parana	No
Crotalus durissus terrificus	AY96643	AY96616	–	10	Brazil	No
Crotalus durissus terrificus	–	AY196617	–	11	Brazil	No
Crotalus durissus terrificus	–	AY196618	–	12	Brazil	No
Crotalus durissus terrificus	–	AY196619	–	13	Brazil	No
Crotalus durissus terrificus	–	AY196622	–	16	Brazil	No
Crotalus durissus terrificus	–	AY196625	–	19	Brazil	No
Crotalus durissus terrificus	–	AY196627	–	21	Brazil	No
Crotalus virids viridis	AF147869	AF194160	AY704799	UTEP 15872	Outgroup	No
Crotalus tigris	AY223606	AF156574	AY016240	CLP 169	Outgroup	No

## Sheet: Leptodeira
Species	Genes		Voucher/Isolate	Country: region	Newly Generated sequence?
	Cyt b	ND4
Leptodeira septentrionalis ornata	GQ334541	GQ334646	ASL 308	Costa Rica	No
Leptodeira septentrionalis ornata	﻿GQ334540	﻿GQ334645	ICP 1089	Costa Rica: Limón	No
Leptodeira septentrionalis ornata		﻿GQ334643	ICP 1108	Costa Rica: Puntarenas	No
Leptodeira septentrionalis ornata	﻿GQ334539	﻿GQ334644	﻿MSM PH 90	Costa Rica: Puntarenas	No
Leptodeira septentrionalis ornata	﻿EF078575	EF078527	﻿USNM 347357	Panamá: Bocas del Toro	No
Leptodeira annulata annulata	﻿GQ334496	GQ334597	﻿LSU-H 12755	Ecuador: Sucumbios	No
Leptodeira annulata annulata	﻿GQ334497	﻿GQ334598	Vidal2000	French Guiana	No
Leptodeira annulata annulata	﻿EF078563	﻿EF078515	﻿KU 214878	Peru: Madre de Dios	No
Leptodeira annulata annulata	﻿GQ334493	﻿GQ334594	﻿BPN 963	Suriname: Para	No
Leptodeira annulata annulata	﻿GQ334494	﻿GQ334595	﻿LSU-H 14016	Brazil: Amazonas	No
Leptodeira annulata annulata	﻿EF078564	﻿EF078516	﻿LSU-H 14438	Brazil: Para	No
﻿Imantodes inornatus	﻿GQ334488	﻿GQ334589	﻿MHUA 14540	Colombia: Antioquia	No
Leptodeira punctata	﻿EF078577	﻿EF078529	﻿UTA R-51974	Mexico: Sinaloa	No
Leptodeira annulata annulata	-	﻿GQ334599	No voucher	Brazil: Goias	No
Leptodeira ﻿nigrofasciata	﻿GQ334525	﻿GQ334628	﻿ASL 190	Costa Rica	No
Leptodeira annulata annulata	GQ334495	GQ334596	LSU-H 12442	Brazil: Roraima	No

## Sheet: Automolus
Species	Genes	Voucher/Isolate	Country: region	Newly Generated sequence?
	cytb
Automolus ochrolaemus	KM079778	AMNH12394	Venezuela: Amazonas	No
Automolus ochrolaemus	KM079840	MPEGESEC 077	Brazil: Acre	No
Automolus ochrolaemus	KM079841	MPEGESEC 097	Brazil: Acre	No
Automolus ochrolaemus	KM079842	MPEGESEC 115	Brazil: Acre	No
Automolus ochrolaemus	KM079843	MPEGESEC 121	Brazil: Acre	No
Automolus ochrolaemus	KM079839	MPEGESEC 210	Brazil: Acre	No
Automolus ochrolaemus	KM079831	MPEGUFAC 012	Brazil: Acre	No
Automolus ochrolaemus	KM079834	MPEGUFAC 060	Brazil: Acre	No
Automolus ochrolaemus	KM079832	MPEGUFAC 084	Brazil: Acre	No
Automolus ochrolaemus	KM079833	MPEGUFAC 103	Brazil: Acre	No
Automolus ochrolaemus	KM079822	MPEGUFAC 506	Brazil: Acre	No
Automolus ochrolaemus	KM079827	MPEGUFAC 924	Brazil: Acre	No
Automolus ochrolaemus	KM079815	FIELD391345	Brazil: Amapa	No
Automolus ochrolaemus	KM079784	AMNH14519	Brazil: Amazonas	No
Automolus ochrolaemus	KM079785	AMNH14626	Brazil: Amazonas	No
Automolus ochrolaemus	KM079867	FIELD457890	Brazil: Amazonas	No
Automolus ochrolaemus	KM079782	MPEGAMZ 409	Brazil: Amazonas	No
Automolus ochrolaemus	KM079783	MPEGAMZ 518	Brazil: Amazonas	No
Automolus ochrolaemus	KM079878	MPEGFPR 049	Brazil: Amazonas	No
Automolus ochrolaemus	KM079866	MPEGJAP 549	Brazil: Amazonas	No
Automolus ochrolaemus	KM079879	MPEGMAR 036	Brazil: Amazonas	No
Automolus ochrolaemus	KM079880	MPEGMAR 166	Brazil: Amazonas	No
Automolus ochrolaemus	KM079881	MPEGMAR 174	Brazil: Amazonas	No
Automolus ochrolaemus	KM079882	MPEGMAR 188	Brazil: Amazonas	No
Automolus ochrolaemus	KM079883	MPEGMAR 189	Brazil: Amazonas	No
Automolus ochrolaemus	KM079771	MPEGSIL 060	Brazil: Amazonas	No
Automolus ochrolaemus	FJ899220	LSUMZ31359	Brazil: Rondônia	No
Automolus ochrolaemus	FJ899224	LSUMZ36699	Brazil: Rondônia	No
Automolus ochrolaemus	KM079877	MPEGMPDS 480	Brazil: Rondônia	No
Automolus ochrolaemus	KM079875	MPEGOP 074	Brazil: Rondônia	No
Automolus ochrolaemus	KM079808	FIELD389199	Brazil: Roraima	No
Automolus ochrolaemus	KM079816	IAvH14533	Colombia: Amazonas	No
Automolus ochrolaemus	KM079817	IAvH14569	Colombia: Amazonas	No
Automolus ochrolaemus	KM079818	IAvH11206	Colombia: Caquetá	No
Automolus ochrolaemus	KM079819	IAvH11217	Colombia: Caquetá	No
Automolus ochrolaemus	KM079820	IAvH11229	Colombia: Caquetá	No
Automolus ochrolaemus	KM079852	ANDES--BT1312	Colombia: Huila	No
Automolus ochrolaemus	KM079851	ANDES--BT521	Colombia: Santander	No
Automolus ochrolaemus	KM079807	IAvH12853	Colombia: Vichada	No
Automolus ochrolaemus	KM079805	IAvH14393	Colombia: Vichada	No
Automolus ochrolaemus	KM079806	IAvH14413	Colombia: Vichada	No
Automolus ochrolaemus	FJ899219	ANSP4306	Ecuador: Esmeraldas	No
Automolus ochrolaemus	FJ899221	ANSP3436	Ecuador: Manabi	No
Automolus ochrolaemus	FJ899227	ANSP5854	Ecuador: Sucumbios	No
Automolus ochrolaemus	FJ899222	ANSP5856	Ecuador: Sucumbios	No
Automolus ochrolaemus	KM079868	ANSP5956	Ecuador: Sucumbios	No
Automolus leucophthalmus	AY590048	NRM 937251	Outgroup	No
Automolus ochrolaemus	KM079758	USNM1990	Panamá: Bocas Del Toro	No
Automolus ochrolaemus	KM079757	LSUMZ51424	Panamá: Chiriqui	No
Automolus ochrolaemus	KM079759	MBMJMD 867	Panamá: Chiriqui	No
Automolus ochrolaemus	KM079760	MBMJMD 874	Panamá: Chiriqui	No
Automolus ochrolaemus	KM079764	LSUMZ26528	Panamá: Colón	No
Automolus ochrolaemus	KM079765	LSUMZ26537	Panamá: Colón	No
Automolus ochrolaemus	KM079763	LSUMZ2241	Panamá: Darién	No
Automolus ochrolaemus	KM079762	BARR15332	Panamá: Panamá	No
Automolus ochrolaemus	KM079837	LSUMZ2027	Peru	No
Automolus ochrolaemus	KM079846	FIELD433308	Peru: Cuzco	No
Automolus ochrolaemus	FJ899204	LSUMZ39944	Peru: Loreto	No
Automolus ochrolaemus	FJ899209	LSUMZ40504	Peru: Loreto	No
Automolus ochrolaemus	FJ899208	LSUMZ40554	Peru: Loreto	No
Automolus ochrolaemus	FJ899202	LSUMZ4159	Peru: Loreto	No
Automolus ochrolaemus	KM079865	LSUMZ4234	Peru: Loreto	No
Automolus ochrolaemus	FJ899218	LSUMZ4264	Peru: Loreto	No
Automolus ochrolaemus	FJ899228	LSUMZ4353	Peru: Loreto	No
Automolus ochrolaemus	KM079826	LSUMZ5123	Peru: Loreto	No
Automolus ochrolaemus	KM079835	FIELD433309	Peru: Madre de Dios	No
Automolus ochrolaemus	KM079836	FIELD433310	Peru: Madre de Dios	No
Automolus ochrolaemus	KM079838	LSUMZ2063	Peru: Pasco	No
Automolus ochrolaemus	FJ899199	LSUMZ46009	Peru: San Martín	No
Automolus ochrolaemus	FJ899214	LSUMZ46133	Peru: San Martín	No
Automolus ochrolaemus	KM079821	LSUMZ10514	Peru: Ucayali	No
Automolus ochrolaemus	FJ899206	LSUMZ10655	Peru: Ucayali	No
Automolus ochrolaemus	KM079844	LSUMZ10864	Peru: Ucayali	No
Automolus ochrolaemus	FJ899225	LSUMZ11048	Peru: Ucayali	No
Automolus ochrolaemus	FJ899226	LSUMZ11164	Peru: Ucayali	No
Automolus ochrolaemus	KM079825	LSUMZ11187	Peru: Ucayali	No
Automolus ochrolaemus	FJ899205	LSUMZ11244	Peru: Ucayali	No
Automolus ochrolaemus	KM079779	AMNH12407	Venezuela: Amazonas	No
Automolus ochrolaemus	KM079781	AMNH12688	Venezuela: Amazonas	No
Automolus infuscatus	KM081605	LSUMZ10576	Outgroup	No

## Sheet: Chlorophanes
Species	Gene	Voucher/Isolate	Country: region	Lat	Long	Newly Generated sequence?
	Cyt b
Chlorophanes spiza	KM079929	MPEGJAP 051	Brazil: Amazonas	–	–	No
Chlorophanes spiza	FJ899509	ANSP:2453	Ecuador: Chocó	0.97	-78.72	No
Coryphospingus pileatus	FJ799870	FMNH 392719	Outgroup	–	–	No
Chlorophanes spiza	KM079928	ICN30199	Colombia: Antioquia	6.05	-75.15	No
Chlorophanes spiza	KM079927	ICN32556	Colombia: Cundinamarca, Yacopi	5.55	-74.3	No
Schistochlamys melanopis	AY383102	LSUMNS B-9669	Outgroup	–	–	No
Chlorophanes spiza	FJ899508	LSUMZ:2727	Peru: Loreto	-3.25	-72.92	No
Chlorophanes spiza	FJ899515	LSUMZ:2783	Peru: Loreto	–	–	No
Chlorophanes spiza	FJ899504	LSUMZ:28014	Peru: Loreto	-7.08	-75.65	No
Chlorophanes spiza	FJ899512	LSUMZ:2861	Peru: Loreto	-3.25	-72.92	No
Chlorophanes spiza	FJ899505	LSUMZ:42292	Peru: Loreto	-5.33	-76.28	No
Chlorophanes spiza	FJ899511	LSUMZ:42349	Peru: Loreto	-5.33	-76.28	No
Chlorophanes spiza	FJ899506	LSUMZ:42539	Peru: Loreto	-5.33	-76.28	No
Chlorophanes spiza	FJ899502	LSUMZ:5431	Peru: Inambari	-6.39	-76.34	No
Chlorophanes spiza	KM079885	LSUMZ16555	Panamá: Colon	9.27	-79.94	No
Chlorophanes spiza	KM079899	LSUMZ2131	Panamá: Darién	8.42	-78.89	No
Chlorophanes spiza	KM079898	LSUMZ2226	Panamá: Darién	7.76	-77.68	No
Chlorophanes spiza	KM079932	LSUMZ2696	Peru: Loreto	-3.25	-72.92	No
Chlorophanes spiza	KM079925	LSUMZ27495	Peru: Loreto	-7.13	-75.68	No
Chlorophanes spiza	KM079926	LSUMZ27558	Peru: Loreto	-7.13	-75.68	No
Chlorophanes spiza	FJ899514	LSUMZ27666	Peru: Loreto	-7.13	-75.68	No
Chlorophanes spiza	KM079924	LSUMZ28016	Peru: Loreto	-7.08	-75.65	No
Chlorophanes spiza	KM079933	LSUMZ2838	Peru: Loreto	-3.25	-72.92	No
Chlorophanes spiza	KM079934	LSUMZ2845	Peru: Loreto	-3.25	-72.92	No
Chlorophanes spiza	KM079931	LSUMZ2966	Peru: Loreto	-3.25	-72.92	No
Chlorophanes spiza	KM079922	LSUMZ42570	Peru: Loreto	-5.31	-76.28	No
Chlorophanes spiza	KM079910	LSUMZ48389	Guyana	–	–	No
Chlorophanes spiza	KM079930	LSUMZ7030	Peru: Loreto	–	–	No
Chlorophanes spiza	KM079889	LSUMZ72156	Costa Rica: San José	–	–	No
Chlorophanes spiza	KM079900	PhelpsML 1371	Venezuela: Barinas	8.87	-70.49	No
Chlorophanes spiza	KM079890	USNM1243	Panamá: Bocas del Toro	9.08	-81.85	No
Chlorophanes spiza	KM079897	USNM295	Panamá: Bocas del Toro	9.25	-82.27	No
Chlorophanes spiza	KM079886	USNM469	Panamá: Bocas del Toro	9.18	-82.28	No
Chlorophanes spiza	KM079887	USNM536	Panamá: Bocas del Toro	9.18	-82.28	No
Chlorophanes spiza	KM079888	USNM537	Panamá: Bocas del Toro	9.18	-82.28	No
Chlorophanes spiza	KM079919	KU1397	Guyana: Iwokrama Reserve	4.28	-58.52	No
Chlorophanes spiza	KM079920	MPEGCN 438	Brazil: Pará	-0.15	-55.18	No
Chlorophanes spiza	KM079921	MPEGCN 503	Brazil: Pará	-0.15	-55.18	No
Chlorophanes spiza	KM079909	LSUMZ48357	Guyana: Kopinang River	4.93	-59.89	No
Chlorophanes spiza	KM079923	LSUMZ22857	Bolivia: La Paz	-15.19	-68.26	No
Chlorophanes spiza	KM079896	UWBMGMS158	Honduras: Atlantida	15.72	-86.87	No
Chlorophanes spiza	KM079892	UWMB56021	Nicaragua: La Luz	13.7	-84.85	No
Chlorophanes spiza	KM079894	MBMDAB 1008	Nicaragua: La Luz	12.85	-85.9	No
Chlorophanes spiza	KM079893	UWMB69945	Nicaragua: La Luz	12.85	-85.9	No
Chlorophanes spiza	KM079895	MBMDAB 1186	Nicaragua: La Luz	12.85	-85.9	No
Chlorophanes spiza	KM079656	UWMB70037	Nicaragua: La Luz	13.7	-84.85	No

## Sheet: Colonia
Species	Genes	Voucher/Isolate	Country: region	Lat	Long	Newly Generated sequence?
	Cyt b
Colonia colonus	DQ294494	FMNH323355	Peru: Madre de Dios	–	–	No
Colonia colonus	KM079951	KU21521	Peru: Puno	-12.87	-71.38	No
Colonia colonus	KM079952	KU21560	Peru: Puno	-14.23	-69.19	No
Colonia colonus	KM079949	LSUMZ10676	Peru: Ucayali	-9.19	-74.38	No
Colonia colonus	FJ899341	LSUMZ111941	Ecuador: Esmeraldas	0.87	-78.55	No
Sublegatus modestus	AF447623	LSUMZ137586	Outgroup	–	–	No
Colonia colonus	KM079944	LSUMZ28471	Panamá: Colón	9.21	-80	No
Colonia colonus	KM079948	LSUMZ43993	Peru: San Martín	-5.69	-77.75	No
Colonia colonus	KM079953	LSUMZ5941	Ecuador: Morona-Santiago	-2.67	-78.2	No
Colonia colonus	FJ899342	LSUMZ5945	Ecuador: Morona-Santiago	-2.67	-78.2	No
Colonia colonus	KM079950	LSUMZ954	Bolivia: La Paz	-15.29	-67.59	No
Colonia colonus	KM079942	MBM18304	Panamá: Veraguas	8.5	-81.12	No
Colonia colonus	KM079945	MBMGMS 1191	Panamá: Colón	9.21	-80	No
Colonia colonus	KM079946	MPEGMPDS 0432	Brazil: Roraima	0.98	-59.87	No
Empidonax flavescens flavescens	AF447599	MVZ 178156	Outgroup	–	–	No
Colonia colonus	KM079943	USNM279	Panamá: Bocas Del Toro	9.23	-82.27	No
Colonia colonus	KM079947	USNM9288	Guyana: Northwest District	7.37	-60.48	No

## Sheet: Cyanerpes
Species	Gene	Voucher/Isolate	Country: region	Newly Generated sequence?
	Cyt b
Cyanerpes caeruleus	FJ899499	LSUMZ11825	Ecuador: Esmeraldas	No
Cyanerpes caeruleus	KM079954	PhelpsML 1207	Venezuela: Barinas	No
Cyanerpes caeruleus	KM079955	USNM5124	Guyana: Cuyuni-Mazaruni	No
Cyanerpes caeruleus	KM079956	USNM5251	Guyana: Essequibo	No
Cyanerpes caeruleus	KM079957	USNM11703	Guyana	No
Cyanerpes caeruleus	KM079958	MPEGAMZ 205	Brazil: Amazonas	No
Cyanerpes caeruleus	KM079959	USNM23614	Guyana: Cuyuni- Mazaruni	No
Cyanerpes caeruleus	KM079960	USNM23627	Guyana: Cuyuni- Mazaruni	No
Cyanerpes caeruleus	KM079961	USNM23630	Guyana: Cuyuni- Mazaruni	No
Cyanerpes caeruleus	KM079962	USNM23643	Guyana: Cuyuni- Mazaruni	No
Cyanerpes caeruleus	KM079963	USNM23650	Guyana: Cuyuni- Mazaruni	No
Cyanerpes caeruleus	KM079964	USNM23695	Guyana: Cuyuni- Mazaruni	No
Cyanerpes caeruleus	KM079965	USNM15680	Guyana	No
Cyanerpes caeruleus	KM079966	ANSP21530	Guyana: Potaro-Siparuni	No
Cyanerpes caeruleus	KM079967	ANSP21531	Guyana: Potaro-Siparuni	No
Cyanerpes caeruleus	KM079968	ANSP21402	Guyana: Potaro-Siparuni	No
Cyanerpes caeruleus	KM079969	ANSP21825	Guyana: Potaro-Siparuni	No
Cyanerpes caeruleus	KM079970	KU5795	Guyana	No
Cyanerpes caeruleus	KM079971	ANSP21681	Guyana	No
Cyanerpes caeruleus	KM079972	LSUMZ7554	Venezuela: Amazonas	No
Cyanerpes caeruleus	KM079973	USNM9500	Guyana: Northwest District	No
Cyanerpes caeruleus	KM079974	LSUMZ42532	Peru: Loreto	No
Cyanerpes caeruleus	FJ899498	LSUMZ5404	Peru: San Martín	No
Cyanerpes caeruleus	KM079975	MPEGPUC 219	Brazil: Amazonas	No
Cyanerpes caeruleus	KM079976	MPEGUFAC 1070	Brazil: Acre	No
Cyanerpes caeruleus	KM079977	LSUMZ9049	Bolivia: Pando	No
Cyanerpes caeruleus	KM079978	LSUMZ1983	Peru: Pasco	No
Cyanerpes caeruleus	KM079979	MPEGUFAC 1982	Brazil: Acre	No
Cyanerpes caeruleus	KM079980	MPEGAMZ 519	Brazil: Amazonas	No
Cyanerpes caeruleus	KM079981	ICN37289	Colombia: Córdoba	No
Cyanerpes caeruleus	KM079982	ICN37290	Colombia: Córdoba	No
Cyanerpes caeruleus	KM079983	ICN36721	Colombia: Antioquia	No
Cyanerpes caeruleus	KM079984	LSUMZ43042	Peru: Loreto	No
Cyanerpes caeruleus	KM079985	ICN34292	Colombia: Amazonas	No
Cyanerpes caeruleus	FJ899500	LSUMZ2730	Peru: Loreto	No
Cyanerpes caeruleus	KM079986	MPEGAMANÃ 040	Brazil: Pará	No
Cyanerpes caeruleus	KM079987	MPEGAMANÃ 042	Brazil: Pará	No
Cyanerpes cyaneus	GU215299	STRIHACCNHA82	Outgroup	No
Cyanerpes nitidus	GU215303	FMNH FM390048	Outgroup	No

## Sheet: Cymbilaimus
Species	Gene	Voucher/Isolate	Country: region	Newly Generated sequence?
	Cyt b
Cymbilaimus lineatus	FJ899308	ANSP1630	Ecuador: Morona-Santiago	No
Cymbilaimus lineatus	FJ899310	ANSP2641	Ecuador: Morona-Santiago	No
Cymbilaimus lineatus	FJ899309	ANSP4686	Ecuador: Esmeraldas	No
Cymbilaimus lineatus	KF826068	FMNH:389850	Brazil	No
Cymbilaimus lineatus	KM080007	ICN33084	Colombia: Guainía, Inírida	No
Cymbilaimus lineatus	KM080012	LSUMNS1129	Bolivia: La Paz	No
Cymbilaimus lineatus	KM079994	LSUMNS2205	Panamá: Darién	No
Cymbilaimus lineatus	KM079995	LSUMNS2252	Panamá: Darién	No
Cymbilaimus lineatus	KM080017	LSUMNS27594	Peru: Loreto	No
Cymbilaimus lineatus	KM080018	LSUMNS27679	Peru: Loreto	No
Cymbilaimus lineatus	KM080019	LSUMNS27958	Peru: Loreto	No
Cymbilaimus lineatus	KM079991	LSUMNS28582	Panamá: Colón	No
Cymbilaimus lineatus	KM079993	LSUMNS28690	Panamá: Panamá	No
Cymbilaimus lineatus	KM079989	LSUMNS28749	Panamá: Colón	No
Cymbilaimus lineatus	KM079990	LSUMNS28750	Panamá: Colón	No
Cymbilaimus lineatus	KM080015	LSUMNS40200	Peru: Loreto	No
Cymbilaimus lineatus	KM080016	LSUMNS40476	Peru: Loreto	No
Cymbilaimus lineatus	FJ899312	LSUMNS4157	Peru: Loreto	No
Cymbilaimus lineatus	KM080011	LSUMNS4633	Peru: Loreto	No
Cymbilaimus lineatus	KM079992	LSUMNS46622	Panama: Darién	No
Cymbilaimus lineatus	FJ899313	LSUMZ18168		No
Cymbilaimus lineatus fasciatus	GU215222	LSUMZ B2252	Panama: Darién	No
Cymbilaimus lineatus	FJ899311	LSUMZ11156	Peru: Ucayali	No
Cymbilaimus lineatus	FJ899314	LSUMZ6890	Peru: Loreto	No
Cymbilaimus lineatus	KM080005	MPEGAMZ 170	Brazil: Amazonas	No
Cymbilaimus lineatus	KM080024	MPEGBR163-116	Brazil: Pará	No
Cymbilaimus lineatus	KM080025	MPEGBR163-161	Brazil: Pará	No
Cymbilaimus lineatus	KM080003	MPEGCN 1174	Brazil: Pará	No
Cymbilaimus lineatus	KM080004	MPEGCN 394	Brazil: Pará	No
Cymbilaimus lineatus	KM080013	MPEGCUJ 176	Brazil: Amazonas	No
Cymbilaimus lineatus	KM080014	MPEGESEC 212	Brazil	No
Cymbilaimus lineatus	KM080020	MPEGJAP 443	Brazil: Amazonas	No
Cymbilaimus lineatus	KM080021	MPEGJAP 457	Brazil: Amazonas	No
Cymbilaimus lineatus	KM080022	MPEGJAP 458	Brazil: Amazonas	No
Cymbilaimus lineatus	KM080006	MPEGJAP 631	Brazil: Amazonas	No
Cymbilaimus lineatus	KM080026	MPEGPPBIO 018	Brazil: Pará	No
Cymbilaimus lineatus	KM080027	MPEGPPBIO 108	Brazil: Pará	No
Cymbilaimus lineatus	KM080009	MPEGPUC 114	Brazil: Amazonas	No
Cymbilaimus lineatus	KM080010	MPEGPUC 115	Brazil: Amazonas	No
Cymbilaimus lineatus	KM080008	MPEGPUC 209	Brazil: Amazonas	No
Cymbilaimus lineatus	KM080023	MPEGWM382	Brazil: Pará	No
Cymbilaimus lineatus	KM080001	PhelpsFM 40	Venezuela: Bolivar	No
Cymbilaimus lineatus fasciatus	GU215221	STRI JTW154	Panama: Bocas del Toro	No
Cymbilaimus lineatus	KM080000	USNM11881	Guyana	No
Cymbilaimus lineatus	KM079998	USNM22078	Guyana: Upper Takutu - Upper Essequibo	No
Cymbilaimus lineatus	KM079999	USNM22134	Guyana: Upper Takutu - Upper Essequibo	No
Cymbilaimus lineatus	KM079988	USNM406	Panamá: Bocas Del Toro	No
Cymbilaimus lineatus	KM079996	USNM5125	Guyana: Cuyuni-Mazaruni	No
Cymbilaimus lineatus	KM079997	USNM5127	Guyana: Cuyuni-Mazaruni	No
Cymbilaimus lineatus	KM080002	USNM9149	Guyana: Barima-Waini	No
Frederickena unduligera	EF030316	LSUMZ B4281	Outgroup	No
Batara cinerea	EF639939	UWBM RTB520	Outgroup	No
Hypoedaleus guttatus	EF639956	UWBM DHB1805	Outgroup	No

[truncated: 30 more sheets: Glyphorhynchus, Henicorhina, Hylophilus, Lepidothrix, Microcerculus, Mionectes oleagineus, Querula purpurata, Schiffornis turdina, Saltator maximus, Sclerurus mexicanus, Tersina viridis, Trogon rufus, Hoja1, Cebus albifrons, Coendou prehensilis, Marmosa robinsoni, Philander opossum, Trachops cirrhosus, Saimiri, Boana boans …]
